# Supplementary material for: Chirality amplification in helical block copolymers. Synthesis and chiroptical properties of block copolymers of chiral/achiral acetylene monomers
Source: Royal Society of Chemistry journal article supplement (doi:10.1039/c5py00743g), 2015-01-01
Supplement: c5py00743g1.pdf [file c5py00743g1.pdf]

*Supporting Information*

Chirality Amplification in Helical Block Copolymers.  
Synthesis and Chiroptical Properties of Block Copolymers of  
Chiral/Achiral Acetylene Monomers

Shohei Kumazawa,<sup>a</sup> Jesus Rodriguez Castanon,<sup>a</sup> Masashi Shiotsuki,<sup>b</sup> Takahiro Sato,<sup>c</sup> and Fumio Sanda<sup>d,\*</sup>

<sup>a</sup> Department of Polymer Chemistry, Graduate School of Engineering, Kyoto University, Katsura Campus, Nishikyo-ku, Kyoto 615-8510, Japan.

<sup>b</sup> Department of Chemistry and Energy Engineering, Faculty of Engineering, Tokyo City University, 1-28-1 Tamazutsumi, Setagaya-ku, Tokyo 158-8557, Japan

<sup>c</sup> Department of Macromolecular Science, Graduate School of Science, Osaka University, 1-1 Machikaneyama-cho, Toyonaka, Osaka 560-0043, Japan.

<sup>d</sup> Department of Chemistry and Materials Engineering, Faculty of Chemistry, Materials and Bioengineering, Kansai University, 3-3-35 Yamate-cho, Suita, Osaka 564-8680, Japan.

\*Corresponding Author. E-mail: sanda@kansai-u.ac.jp

**Correction of the Degree of Polymerization of the Block Copolymer of 1a and 1b.** The molecular weight obtained by SEC using the calibration curve made with standard polystyrene samples is not the true one. One may correct this molecular weight to estimate the true molecular weight or degree of polymerization by the following procedure. It is well known that the elution volume  $V_E$  of a polymer fraction eluted from an SEC column is a universal function of the molecular weight multiplied by the intrinsic viscosity. Thus, when the molecular weight and the intrinsic viscosity of the block copolymer sample of **1a** and **1b** are denoted as  $M$  and  $[\eta]$ , respectively, and those of polystyrene with the same  $V_E$  as  $M_{PS}$  and  $[\eta]_{PS}$ , respectively, we have the relation  $M[\eta] = M_{PS}[\eta]_{PS}$ .

Tsimpris<sup>1</sup> demonstrated the Mark-Houwink-Sakurada relation for polystyrene in DMF

$$[\eta]_{PS} = K_{PS}M_{PS}^{a_{PS}} \quad (S1)$$

with  $K_{PS} = 0.0318 \text{ cm}^3/\text{g}$  and  $a_{PS} = 0.603$ . Hirao et al.<sup>2</sup> and Ashida et al.<sup>3</sup> reported the relation between  $[\eta]$  and the degree of polymerization  $N_0$  for poly(phenylacetylene) derivatives in good solvents, which is given in the form

$$[\eta]M = K'N_0^{1+a} \quad (S2)$$

with  $K' = 174 \text{ cm}^3/\text{g}$ , and  $a = 0.609$ . Assuming that the same relation holds for the block copolymer of 1a and 1b, we can calculate  $N_0$  of the copolymer by

$$N_0 = \left[ (K_{PS}/K')M_{PS}^{1+a_{PS}} \right]^{1/(1+a)} \quad (S3)$$

When we substitute weight average molecular weights  $M_w$  calculated from  $M_n$  and  $M_w/M_n$  listed in the fifth and sixth columns of Table 2 into  $M_{PS}$  in eq S3, we obtain values of  $N_{0,w}$  listed in the seventh column of Table 2.

## References

1. C. W. Tsimpris, B. Suryanarayanan, X. G. Mayhan, *J. Polym. Sci. Part A-2: Polym. Phys.* 1972, **10**, 1837–1839.
2. T. Hirao, T. Sato, T. Norisuye, A. Teramoto, T. Masuda, T. Higashimura, *Polym. J.* 1991, **23**, 925–932.
3. Y. Ashida, T. Sato, K. Morino, K. Maeda, Y. Okamoto, E. Yashima, *Macromolecules* 2003, **36**, 3345–3350.

**Table S1. Atomic Charges of Ethynyl Groups of Monomers 1a and 1b <sup>a</sup>**

| monomer   | Mulliken charge |               |
|-----------|-----------------|---------------|
|           | $-C\equiv CH$   | $-C\equiv CH$ |
| <b>1a</b> | +0.364          | -0.607        |
| <b>1b</b> | +0.364          | -0.606        |

<sup>a</sup> Calculated by the DFT (B3LYP/6-31G\*) method.

**Table S2. Interatomic Distances in the Optimized Geometry of the Most Stable 24-mer of 1b<sup>a</sup> ( $\phi = 137.5^\circ$ )**

| unit number |             | interatomic distance ( $>N-H\cdots O=C<$ , Å) |           |
|-------------|-------------|-----------------------------------------------|-----------|
| <i>n</i>    | <i>n</i> +2 | amide                                         | carbamate |
| 1           | 3           | 3.63793                                       | 2.10105   |
| 2           | 4           | 3.88109                                       | 2.04720   |
| 3           | 5           | 3.37643                                       | 2.10105   |
| 4           | 6           | 2.12001                                       | 2.01225   |
| 5           | 7           | 3.29120                                       | 2.02249   |
| 6           | 8           | 2.04345                                       | 1.96890   |
| 7           | 9           | 2.05384                                       | 2.03999   |
| 8           | 10          | 2.04345                                       | 1.92700   |
| 9           | 11          | 2.07886                                       | 1.96184   |
| 10          | 12          | 2.08103                                       | 1.99560   |
| 11          | 13          | 2.88233                                       | 2.00131   |
| 12          | 14          | 2.20309                                       | 1.97429   |
| 13          | 15          | 2.07750                                       | 1.97641   |
| 14          | 16          | 2.03388                                       | 1.98599   |
| 15          | 17          | 2.04999                                       | 1.95101   |
| 16          | 18          | 2.11358                                       | 1.98623   |
| 17          | 19          | 2.79057                                       | 2.02576   |
| 18          | 20          | 2.00546                                       | 1.98740   |
| 19          | 21          | 2.31798                                       | 1.96769   |
| 20          | 22          | 2.20127                                       | 1.96089   |
| 21          | 23          | 2.31798                                       | 1.99128   |
| 22          | 24          | 1.99060                                       | 1.98822   |
| average     |             | 2.43598                                       | 1.99881   |

<sup>a</sup> Calculated by the PM6 method.

**Table S3. Energies for Various Conformers of 16-mer of 1b Calculated by the PM6 Method**<sup>a</sup>

| conformer                                                             | solvent molecule <sup>b</sup> | $\Delta E^c$<br>(kJ/mol) | $\Delta\Delta E^d$<br>(kJ/mol) |
|-----------------------------------------------------------------------|-------------------------------|--------------------------|--------------------------------|
| <b>1b-16-mer<sub>RH</sub></b>                                         | none                          | 0.00                     | 0.00                           |
| <b>1b-16-mer<sub>RH</sub>/16CHCl<sub>3</sub></b>                      | CHCl <sub>3</sub>             | -32.27                   | 0.00                           |
| <b>1b-16-mer<sub>RH</sub>/16THF</b>                                   | THF                           | -28.85                   | 0.00                           |
| <b>1b-8-mer<sub>RH</sub>-1b-8-mer<sub>LH</sub></b>                    | none                          | +0.47                    | +0.47                          |
| <b>1b-8-mer<sub>RH</sub>-1b-8-mer<sub>LH</sub>/16CHCl<sub>3</sub></b> | CHCl <sub>3</sub>             | -27.43                   | +4.84                          |
| <b>1b-8-mer<sub>RH</sub>-1b-8-mer<sub>LH</sub>/16THF</b>              | THF                           | -28.55                   | +0.30                          |

<sup>a</sup> All geometries were fully optimized. <sup>b</sup> Total of sixteen solvent molecules were located at the side chains of one conformer. The distance between each solvent molecule and hydrogen atom of -CO<sub>2</sub>NH- was set to be 2 Å in the initial conformation. <sup>c</sup> Relative energy per monomer unit using the value of **1b-16-mer<sub>RH</sub>** as a standard. The value of a conformer with solvent molecules was adjusted using the energy values of CHCl<sub>3</sub> and THF molecules, respectively. <sup>d</sup> Energy difference between **1b-8-mer<sub>RH</sub>-1b-8-mer<sub>LH</sub>** series and **1b-16-mer<sub>RH</sub>** series accompanying no, 16 CHCl<sub>3</sub> and 16 THF molecules, respectively.

## Cartesian Coordinates of Optimized Geometries

### The most stable 24-mer of 1b ( $\phi = 137.5^\circ$ )

|   |              |             |             |
|---|--------------|-------------|-------------|
| C | -26.79413800 | -1.08084900 | 0.81239000  |
| C | -25.56021000 | -0.90396300 | 0.32003000  |
| C | -24.86110600 | 0.38233800  | 0.49978400  |
| C | -23.56395700 | 0.55790300  | 0.82871400  |
| C | -22.62545600 | -0.57059500 | 0.90648300  |
| C | -21.35614400 | -0.61248800 | 0.45071300  |
| C | -20.60126900 | 0.58059800  | 0.04212700  |
| C | -19.30874900 | 0.84700000  | 0.32945500  |
| C | -18.42352700 | -0.16782900 | 0.91632600  |
| C | -17.14206800 | -0.42807600 | 0.58038500  |
| C | -16.30894900 | 0.51837500  | -0.17019800 |
| C | -15.01533200 | 0.82385700  | 0.07179200  |
| C | -14.17556900 | -0.01490700 | 0.93717100  |
| C | -12.89593600 | -0.37709900 | 0.70624800  |
| C | -12.09969700 | 0.25343200  | -0.35283700 |
| C | -10.81059000 | 0.64752800  | -0.27210400 |
| C | -9.89734800  | 0.14104400  | 0.75526000  |
| C | -8.61045600  | -0.23911900 | 0.59774300  |
| C | -7.82080100  | 0.19327800  | -0.56200000 |
| C | -6.53844800  | 0.61269700  | -0.53634900 |
| C | -5.69978500  | 0.44008700  | 0.65497600  |
| C | -4.41105700  | 0.04141800  | 0.68356600  |
| C | -3.57656400  | 0.02208400  | -0.52036600 |
| C | -2.29266300  | 0.42463000  | -0.62975900 |
| C | -1.43245300  | 0.58960600  | 0.54471500  |
| C | -0.14242200  | 0.21421300  | 0.67721800  |
| C | 0.70604200   | -0.08318100 | -0.47969200 |
| C | 1.99050500   | 0.28758400  | -0.66809200 |
| C | 2.85692100   | 0.69628500  | 0.44095900  |
| C | 4.14781700   | 0.34765500  | 0.63044500  |
| C | 4.94373800   | -0.24351300 | -0.45171700 |
| C | 6.22168800   | 0.06209100  | -0.75819400 |
| C | 7.05492900   | 0.85642000  | 0.14968800  |
| C | 8.34721900   | 0.63282800  | 0.46782000  |
| C | 9.20671200   | -0.23679400 | -0.33881100 |
| C | 10.48768300  | -0.00746100 | -0.69614700 |
| C | 11.31744600  | 0.99051700  | -0.01608500 |
| C | 12.60840200  | 0.84992500  | 0.35166800  |
| C | 13.44533400  | -0.24086200 | -0.15503700 |
| C | 14.72710600  | -0.16263400 | -0.57061400 |
| C | 15.58003500  | 0.98379300  | -0.24907800 |
| C | 16.87208100  | 0.96298900  | 0.14171900  |
| C | 17.71581800  | -0.22104200 | -0.02836500 |
| C | 18.99681400  | -0.26892100 | -0.44918800 |
| C | 19.86616400  | 0.90938100  | -0.49754600 |
| C | 21.16055700  | 0.98459000  | -0.12262300 |
| C | 21.95237000  | -0.21082300 | 0.17883400  |
| C | 23.21695600  | -0.43494300 | -0.20116500 |
| C | -23.33124600 | -4.06309700 | -1.53349400 |
| C | -24.84607700 | -2.01372200 | -0.36118100 |

|   |              |              |             |
|---|--------------|--------------|-------------|
| C | -23.58484200 | -2.88087300  | -2.25043700 |
| C | -23.88304600 | -4.24519900  | -0.24797800 |
| C | -24.64391000 | -3.22708800  | 0.32101300  |
| C | -24.32980800 | -1.86144800  | -1.65648400 |
| N | -22.49833100 | -5.11104900  | -2.04834600 |
| C | -22.15159200 | -5.28236700  | -3.39415800 |
| O | -22.53275400 | -4.55180700  | -4.28832600 |
| C | -21.22527300 | -6.47807000  | -3.67219700 |
| N | -21.87480800 | -7.76796200  | -3.40586100 |
| C | -21.79202900 | -8.35968800  | -2.15447300 |
| O | -21.16375700 | -7.92977200  | -1.19445200 |
| O | -22.51890500 | -9.51582800  | -2.17098800 |
| C | -22.66924600 | -10.34328000 | -0.92744700 |
| C | -23.54947400 | -11.45953300 | -1.48093800 |
| C | -21.29507000 | -10.82361800 | -0.49510000 |
| C | -23.36921400 | -9.49138300  | 0.12003700  |
| H | -27.34265200 | -2.00525500  | 0.71670200  |
| H | -23.19529500 | -2.75932800  | -3.26610300 |
| H | -23.71301700 | -5.16710200  | 0.30245300  |
| H | -25.07170300 | -3.36455300  | 1.31410900  |
| H | -24.50190900 | -0.93255500  | -2.20068300 |
| H | -22.10024500 | -5.75727200  | -1.35055400 |
| H | -20.27180600 | -6.37239400  | -3.07423800 |
| H | -22.48974300 | -8.15162300  | -4.11976600 |
| H | -23.03515400 | -12.02029500 | -2.27238200 |
| H | -24.46897300 | -11.05835900 | -1.92809300 |
| H | -23.83654900 | -12.16659600 | -0.69606000 |
| H | -20.71910300 | -10.02610700 | 0.00931500  |
| H | -20.69762300 | -11.16698600 | -1.34842100 |
| H | -21.36131100 | -11.65504000 | 0.21517600  |
| H | -22.72855600 | -8.65660300  | 0.44753700  |
| H | -23.62576500 | -10.07731600 | 1.00847300  |
| H | -24.29612600 | -9.05159700  | -0.26811800 |
| H | -20.91088900 | -6.43525400  | -4.74334200 |
| H | -25.51625800 | 1.25534800   | 0.41118500  |
| C | -23.02732200 | 1.92075100   | 1.06769800  |
| C | -23.09226700 | 2.89973700   | 0.06180300  |
| C | -22.39013000 | 2.22416300   | 2.28177300  |
| C | -22.46153200 | 4.13124000   | 0.22873600  |
| H | -23.61929800 | 2.68564600   | -0.86792200 |
| C | -21.77415600 | 3.45937000   | 2.47289800  |
| H | -22.36284100 | 1.47911700   | 3.07750100  |
| C | -21.77276600 | 4.40299400   | 1.42954900  |
| H | -22.49505600 | 4.86889300   | -0.56964800 |
| H | -21.28537100 | 3.68998500   | 3.42522700  |
| N | -21.06063900 | 5.64283000   | 1.52268000  |
| C | -20.57662800 | 6.21102600   | 2.70919500  |
| H | -20.85560800 | 6.11760900   | 0.63006900  |
| O | -20.74786600 | 5.72167800   | 3.80937400  |
| C | -19.77905500 | 7.51158600   | 2.52557100  |
| N | -20.60073600 | 8.61255900   | 2.01006700  |
| H | -18.88799900 | 7.32149100   | 1.85556600  |
| H | -19.34705900 | 7.79961400   | 3.51486100  |
| C | -20.70963000 | 8.83722600   | 0.64461400  |

|   |              |             |             |   |              |              |             |
|---|--------------|-------------|-------------|---|--------------|--------------|-------------|
| H | -21.15685000 | 9.14911600  | 2.67062600  | O | -19.35855100 | -9.36161800  | 1.78167400  |
| O | -20.15808600 | 8.18475300  | -0.23291900 | N | -17.46175900 | 8.90193400   | -1.50436900 |
| O | -21.54556200 | 9.89754400  | 0.45037200  | H | -15.45465300 | 8.14092000   | -1.33301400 |
| C | -21.82320200 | 10.42418500 | -0.92861400 | H | -16.08703100 | 9.02437100   | 0.10282400  |
| C | -22.82016500 | 11.52307600 | -0.57009100 | C | -19.46992100 | -9.58514500  | 3.26062300  |
| C | -20.52233400 | 10.95985700 | -1.49914200 | C | -17.20510000 | 9.26589100   | -2.82321000 |
| C | -22.43778400 | 9.30693500  | -1.75512400 | H | -18.43171300 | 8.69222600   | -1.20920200 |
| H | -22.35417800 | 12.30013800 | 0.04936600  | C | -20.67497100 | -10.52251900 | 3.27808100  |
| H | -23.66272000 | 11.12238000 | 0.00934900  | C | -18.19353000 | -10.24026100 | 3.75895300  |
| H | -23.22504100 | 12.00064400 | -1.46788100 | C | -19.75146500 | -8.23822300  | 3.90964800  |
| H | -19.89991700 | 10.15986400 | -1.94026900 | O | -16.11375000 | 9.48863600   | -3.31938100 |
| H | -19.91147600 | 11.44550800 | -0.72752500 | O | -18.40718900 | 9.43748100   | -3.46538200 |
| H | -20.69678200 | 11.69631800 | -2.29008300 | H | -20.43432100 | -11.49264100 | 2.82606600  |
| H | -21.71743200 | 8.48614700  | -1.91301000 | H | -21.50959500 | -10.10142300 | 2.70044500  |
| H | -22.74653200 | 9.66195200  | -2.74368200 | H | -21.02544400 | -10.70070500 | 4.29960500  |
| H | -23.31619400 | 8.87184300  | -1.26446900 | H | -17.37623400 | -9.50612300  | 3.88531200  |
| H | -23.07225600 | -1.49083100 | 1.30321700  | H | -17.83074400 | -11.00413800 | 3.06055800  |
| C | -20.67063500 | -1.92695300 | 0.34997900  | H | -18.33836200 | -10.72255800 | 4.73114200  |
| C | -20.52369300 | -2.76627400 | 1.46602200  | H | -18.87877200 | -7.56968000  | 3.82737500  |
| C | -20.14600300 | -2.32786100 | -0.89021300 | H | -19.98440100 | -8.34376200  | 4.97379300  |
| H | -21.19499300 | 1.33361500  | -0.48868500 | H | -20.59503000 | -7.72679600  | 3.43062200  |
| C | -19.81855900 | -3.96435200 | 1.36246100  | C | -18.44106000 | 9.95902300   | -4.86661300 |
| H | -20.94935800 | -2.47195900 | 2.42489100  | C | -19.94769400 | 9.93055300   | -5.11753600 |
| C | -19.45221100 | -3.52943300 | -1.01339200 | C | -17.86175100 | 11.36563600  | -4.86191000 |
| H | -20.27732200 | -1.68799100 | -1.76414300 | C | -17.67660100 | 8.99520100   | -5.76001900 |
| C | -18.75261500 | 2.18650700  | 0.01736700  | H | -20.48470500 | 10.57371800  | -4.40994800 |
| C | -19.27007400 | -4.34095200 | 0.11965100  | H | -20.34925600 | 8.91664500   | -4.98836300 |
| H | -19.69099100 | -4.59474900 | 2.23879800  | H | -20.18614000 | 10.26397500  | -6.13207500 |
| H | -19.04435200 | -3.83327400 | -1.98247700 | H | -16.78617600 | 11.34727400  | -4.61555300 |
| C | -18.72859700 | 2.66640000  | -1.30320900 | H | -18.34658900 | 12.00200400  | -4.11336500 |
| C | -18.22364700 | 2.97648900  | 1.05035800  | H | -17.96590600 | 11.84936900  | -5.83753000 |
| N | -18.53234800 | -5.56996000 | 0.06321500  | H | -16.58859600 | 9.03592800   | -5.56577200 |
| C | -18.13606800 | 3.89215300  | -1.59940600 | H | -17.82641500 | 9.22147000   | -6.81941600 |
| H | -19.16401000 | 2.06873700  | -2.10380900 | H | -17.98275600 | 7.95641100   | -5.58882500 |
| C | -17.64606100 | 4.21435700  | 0.77198200  | H | -18.92295800 | -0.83811200  | 1.62703300  |
| H | -18.25980200 | 2.61583500  | 2.07923300  | C | -16.54263500 | -1.72020300  | 1.00071700  |
| C | -18.27563800 | -6.29727800 | -1.10154400 | C | -16.45980600 | -2.09455900  | 2.35111900  |
| H | -18.15837000 | -5.91756400 | 0.95732800  | C | -16.05575700 | -2.58974400  | 0.00996100  |
| C | -17.58357800 | 4.66502900  | -0.55765300 | H | -16.85395600 | 1.09043200   | -0.93093000 |
| H | -18.10540200 | 4.24698100  | -2.62733300 | C | -15.85820100 | -3.29865000  | 2.71562400  |
| H | -17.23832800 | 4.82757200  | 1.58121300  | H | -16.85555500 | -1.43383300  | 3.12185800  |
| O | -18.57062000 | -5.90378700 | -2.21937600 | C | -15.46956000 | -3.80419500  | 0.35742600  |
| C | -17.60497300 | -7.65824800 | -0.88381800 | H | -16.13576200 | -2.30967000  | -1.04138300 |
| N | -16.97537800 | 5.91610400  | -0.91084100 | C | -14.42298200 | 2.03473300   | -0.54953900 |
| N | -18.44802000 | -8.59661000 | -0.12324200 | C | -15.35385900 | -4.15265800  | 1.71458200  |
| H | -16.59782500 | -7.52192000 | -0.39038800 | H | -15.77852200 | -3.56841200  | 3.76601600  |
| H | -17.38848600 | -8.11090400 | -1.88288800 | H | -15.10108400 | -4.48087800  | -0.41984400 |
| C | -16.84098700 | 7.00088000  | -0.04903800 | C | -14.65665800 | 2.35346100   | -1.89740700 |
| H | -16.57900700 | 5.98439700  | -1.86537500 | C | -13.63158900 | 2.89386000   | 0.23573000  |
| C | -18.35389000 | -8.59068800 | 1.27033500  | H | -14.68965700 | -0.42114900  | 1.81629800  |
| H | -19.37195900 | -8.81309200 | -0.54360900 | N | -14.72222600 | -5.37217400  | 2.12922600  |
| O | -17.10040400 | 6.95193200  | 1.14508100  | C | -14.10704900 | 3.50662100   | -2.45948200 |
| C | -16.37258000 | 8.30627100  | -0.70534500 | H | -15.26940800 | 1.69584500   | -2.51400100 |
| O | -17.48583600 | -8.04001400 | 1.93525100  | C | -13.06825000 | 4.04335900   | -0.31552900 |

|   |              |             |             |   |              |             |             |
|---|--------------|-------------|-------------|---|--------------|-------------|-------------|
| H | -13.45695500 | 2.65469500  | 1.28532400  | C | -14.43601000 | -8.54179600 | 7.19993200  |
| C | -12.30160600 | -1.45047000 | 1.53991100  | C | -15.97356300 | -6.55784500 | 6.80985700  |
| C | -14.57580900 | -6.50557000 | 1.32685500  | O | -11.96758300 | 7.80752400  | -5.98536600 |
| H | -14.33622000 | -5.38736200 | 3.08640000  | O | -14.05251200 | 8.64209900  | -6.45928700 |
| C | -13.30624800 | 4.34282700  | -1.66718900 | N | -11.04739400 | -6.99813700 | 5.81412700  |
| H | -14.30028500 | 3.75992100  | -3.50101300 | H | -9.11059300  | -6.37579800 | 5.11522400  |
| H | -12.45617100 | 4.70380700  | 0.29585500  | H | -9.83884700  | -7.78353600 | 4.25944000  |
| C | -12.13125400 | -1.28592800 | 2.92433600  | C | -9.26887900  | 5.83061400  | -4.03938300 |
| C | -11.93180200 | -2.66130200 | 0.93273100  | H | -8.42529800  | 4.10749300  | -4.89989000 |
| H | -12.67867200 | 0.52451200  | -1.24651600 | H | -16.75614400 | -9.96408700 | 6.77877500  |
| O | -14.93955700 | -6.55505700 | 0.16165300  | H | -17.82920400 | -8.61865000 | 6.39475700  |
| C | -13.93098200 | -7.71108700 | 2.02042000  | H | -17.18521500 | -8.79291800 | 8.04040500  |
| N | -12.70498600 | 5.52862100  | -2.23807200 | H | -13.57810600 | -7.91296200 | 6.89386500  |
| C | -11.55857800 | -2.29964800 | 3.69024900  | H | -14.20548000 | -9.56783500 | 6.89314900  |
| H | -12.44259600 | -0.35746400 | 3.40164900  | H | -14.45343100 | -8.50837600 | 8.29858500  |
| C | -11.38322700 | -3.69397500 | 1.69080200  | H | -15.10313000 | -5.96853800 | 6.47388900  |
| H | -12.07919200 | -2.79606400 | -0.13954400 | H | -16.13806500 | -6.32138700 | 7.86557500  |
| C | -10.31932500 | 1.61410000  | -1.28685900 | H | -16.84022800 | -6.19882600 | 6.24331200  |
| N | -14.78804900 | -8.29799100 | 3.06489700  | C | -13.79305600 | 8.74624100  | -7.92905600 |
| H | -12.92138300 | -7.42540100 | 2.44067400  | C | -10.65682700 | -6.75129500 | 7.12296700  |
| H | -13.72677600 | -8.49609800 | 1.25174700  | H | -12.04901700 | -7.04080700 | 5.56227500  |
| C | -13.47333500 | 6.58612700  | -2.70007600 | O | -9.98189900  | 6.31402500  | -3.16526800 |
| H | -11.66932400 | 5.54021300  | -2.31115500 | C | -8.60535700  | 6.68552400  | -5.12683800 |
| C | -11.18156900 | -3.50681200 | 3.06898600  | C | -15.15642100 | 9.24957700  | -8.39819600 |
| H | -11.41263400 | -2.15910300 | 4.75902500  | C | -12.68035100 | 9.76168000  | -8.14425600 |
| H | -11.11752400 | -4.64496800 | 1.22044300  | C | -13.45558500 | 7.36171400  | -8.46080000 |
| C | -10.30793400 | 1.30273900  | -2.65628400 | O | -9.51332400  | -6.62572000 | 7.53085700  |
| C | -9.90707300  | 2.88643600  | -0.85822300 | O | -11.77628000 | -6.75230700 | 7.92087200  |
| C | -14.72560600 | -7.75101100 | 4.34777300  | N | -9.31210200  | 6.59819200  | -6.41243600 |
| H | -15.69272000 | -8.68109200 | 2.74051300  | H | -7.52143900  | 6.38821600  | -5.24682900 |
| O | -14.69901700 | 6.58065900  | -2.64289300 | H | -8.60553100  | 7.75125100  | -4.79135800 |
| C | -12.68723900 | 7.78841200  | -3.23090800 | H | -15.45123500 | 10.15402900 | -7.84884100 |
| N | -10.59079900 | -4.52462700 | 3.89128500  | H | -15.93940600 | 8.50171200  | -8.22174800 |
| C | -9.86954800  | 2.24046500  | -3.59087400 | H | -15.14528500 | 9.48761800  | -9.46605600 |
| H | -10.63976400 | 0.31971100  | -2.99072800 | H | -11.72243100 | 9.39228900  | -7.74406500 |
| C | -9.49114800  | 3.84171000  | -1.78306100 | H | -12.89418700 | 10.70824000 | -7.63333600 |
| H | -9.91553400  | 3.12685500  | 0.20509700  | H | -12.52917900 | 9.97814600  | -9.20605100 |
| O | -13.89586100 | -6.94062800 | 4.74399700  | H | -12.47631300 | 7.01570200  | -8.08286500 |
| O | -15.70661000 | -8.30488000 | 5.11956600  | H | -13.40914600 | 7.35043600  | -9.55338000 |
| N | -13.43035700 | 8.47569100  | -4.29892100 | H | -14.19401100 | 6.61698200  | -8.14224800 |
| H | -11.65599200 | 7.49999600  | -3.58737300 | C | -11.63055200 | -6.63009500 | 9.40420600  |
| H | -12.52434300 | 8.50925600  | -2.39191400 | C | -9.10165800  | 5.49665100  | -7.23336100 |
| C | -10.68442900 | -5.88990800 | 3.63907400  | H | -10.18754200 | 7.14350000  | -6.50219500 |
| H | -10.02008600 | -4.19523600 | 4.69131400  | C | -13.10152200 | -6.64685700 | 9.81661600  |
| C | -9.46418600  | 3.51303500  | -3.14965200 | C | -10.85773400 | -7.84097700 | 9.90528300  |
| H | -9.84991100  | 1.98988000  | -4.64981500 | C | -10.94744200 | -5.30785800 | 9.71648700  |
| H | -9.18456900  | 4.83598600  | -1.45309600 | O | -8.23733500  | 4.63872300  | -7.08000500 |
| C | -15.73785700 | -8.04510600 | 6.59752900  | O | -9.99080200  | 5.54081300  | -8.26729200 |
| C | -13.05169700 | 8.23782900  | -5.61644800 | H | -13.60554000 | -7.56003100 | 9.46223000  |
| H | -14.41482800 | 8.72612400  | -4.08188300 | H | -13.64429300 | -5.79945500 | 9.37841000  |
| O | -11.22173400 | -6.35512700 | 2.64431700  | H | -13.20802700 | -6.59635800 | 10.90411700 |
| C | -10.07806700 | -6.79433100 | 4.72165200  | H | -9.81760400  | -7.82379000 | 9.53665200  |
| N | -9.00569000  | 4.46810200  | -4.12167800 | H | -11.30161900 | -8.77930800 | 9.55435100  |
| C | -16.94312000 | -8.90151800 | 6.97852000  | H | -10.81705400 | -7.87238500 | 10.99784500 |



|   |              |             |              |   |             |             |             |
|---|--------------|-------------|--------------|---|-------------|-------------|-------------|
| H | -9.88284600  | -5.32285300 | 9.41638500   | N | -6.73959800 | -5.33400300 | 7.70335300  |
| H | -10.98364800 | -5.07723300 | 10.78471600  | H | -5.01091700 | -4.80461900 | 6.54702600  |
| H | -11.41098700 | -4.47601300 | 9.17348800   | H | -5.92617200 | -6.23358500 | 5.97345800  |
| C | -9.87904000  | 4.58424100  | -9.41583900  | C | -4.99270200 | 4.65429600  | -5.50919000 |
| C | -11.06399400 | 5.06369400  | -10.25135100 | H | -3.74140300 | 2.96000900  | -5.60570400 |
| C | -8.53924000  | 4.81151500  | -10.09501500 | C | -2.87681400 | -1.32769900 | 4.43220700  |
| C | -10.06002100 | 3.17204000  | -8.88240900  | H | -3.18393500 | 0.70085300  | 5.14709000  |
| H | -10.93245500 | 6.10719900  | -10.56512000 | H | -2.68083100 | -3.25703000 | 3.45933400  |
| H | -11.99772200 | 5.02283700  | -9.67438600  | C | -1.59889900 | -0.30665800 | -2.94552800 |
| H | -11.19222900 | 4.44994800  | -11.14800900 | C | -1.53898300 | 2.04750900  | -2.34887900 |
| H | -7.71525100  | 4.30247100  | -9.56102200  | H | -1.95703000 | 0.96368900  | 1.43385500  |
| H | -8.28230700  | 5.87734400  | -10.13359300 | C | -6.28761800 | -4.54966300 | 8.75906500  |
| H | -8.53369600  | 4.43353800  | -11.12185200 | H | -7.72931600 | -5.64687500 | 7.67485600  |
| H | -9.22397400  | 2.89071900  | -8.21948900  | O | -5.78638100 | 5.31716600  | -4.85701700 |
| H | -10.10046200 | 2.43793300  | -9.69270300  | C | -4.47591700 | 5.11613800  | -6.87989300 |
| H | -10.97947300 | 3.07617000  | -8.29290700  | N | -2.36422200 | -1.77830200 | 5.69642500  |
| H | -10.38485500 | -0.06006100 | 1.71830000   | C | -1.15210100 | 0.00011100  | -4.23129000 |
| C | -7.97465700  | -1.08496500 | 1.64022000   | H | -1.80713900 | -1.34211200 | -2.67816400 |
| C | -8.14723700  | -0.81203600 | 3.00777600   | C | -1.12527500 | 2.37087000  | -3.63930600 |
| C | -7.20972900  | -2.20062900 | 1.25250100   | H | -1.68903600 | 2.83773700  | -1.61270100 |
| H | -8.37424800  | 0.23741600  | -1.50662900  | C | 0.41224700  | 0.12215500  | 2.05260500  |
| C | -7.56396100  | -1.63112500 | 3.97546000   | O | -5.19116800 | -4.01146400 | 8.83342800  |
| H | -8.73963900  | 0.04769400  | 3.32047600   | O | -7.22754500 | -4.53347600 | 9.75437300  |
| C | -6.61415700  | -3.02224300 | 2.20900600   | N | -5.34637500 | 4.59185900  | -7.95055000 |
| H | -7.08091500  | -2.42182300 | 0.19243800   | H | -3.40241100 | 4.81646500  | -7.04439200 |
| C | -5.99631800  | 1.31807600  | -1.72503400  | H | -4.50426900 | 6.23199900  | -6.91575100 |
| C | -6.79046800  | -2.72997500 | 3.57146900   | C | -2.61652500 | -3.04197000 | 6.22054800  |
| H | -7.70966600  | -1.42405100 | 5.03472000   | H | -1.76182100 | -1.11961400 | 6.22238400  |
| H | -6.02389500  | -3.88400500 | 1.90289200   | C | -0.91882500 | 1.34308700  | -4.57597200 |
| C | -5.79309900  | 0.65325400  | -2.94481500  | H | -0.99458600 | -0.79182800 | -4.96108200 |
| C | -5.72752500  | 2.69307000  | -1.62784100  | H | -0.97256600 | 3.41218400  | -3.92801300 |
| H | -6.23433400  | 0.57362100  | 1.60497900   | C | 0.56181600  | 1.26199700  | 2.85939900  |
| N | -6.15093800  | -3.57004100 | 4.56212500   | C | 0.74586700  | -1.14185400 | 2.56512100  |
| C | -5.29045200  | 1.34199800  | -4.04808800  | H | 0.17296600  | -0.54954200 | -1.31777600 |
| H | -6.02609600  | -0.40762000 | -3.02950300  | C | -6.88011700 | -3.97481900 | 11.09823300 |
| C | -5.25834200  | 3.40143600  | -2.73323200  | C | -4.85082500 | 3.58392600  | -8.77588400 |
| H | -5.89582000  | 3.21142200  | -0.68381000  | H | -6.36902100 | 4.63922100  | -7.77302300 |
| C | -3.84923500  | -0.40223500 | 1.98348100   | O | -3.35294700 | -3.85166100 | 5.66730900  |
| C | -6.88139900  | -4.36665900 | 5.43138200   | C | -1.90451200 | -3.33800100 | 7.54750200  |
| H | -5.11574700  | -3.52267500 | 4.61566200   | N | -0.45303600 | 1.64622000  | -5.90350900 |
| C | -5.02655800  | 2.72009700  | -3.93941200  | C | 1.07852000  | 1.15070700  | 4.14953700  |
| H | -5.11537500  | 0.81908300  | -4.98602300  | H | 0.27700600  | 2.23999700  | 2.47259500  |
| H | -5.08753100  | 4.47807700  | -2.67367300  | C | 1.23171400  | -1.27149100 | 3.86528400  |
| C | -3.76120700  | 0.46963600  | 3.08089300   | H | 0.61793800  | -2.02841600 | 1.94373900  |
| C | -3.45042800  | -1.74150900 | 2.12210400   | C | 2.53383900  | 0.25319300  | -2.05124600 |
| H | -4.11779400  | -0.24760900 | -1.43583900  | C | -8.19979300 | -4.21627100 | 11.82781000 |
| O | -8.10563800  | -4.42630300 | 5.39824100   | C | -5.72962900 | -4.78979400 | 11.67057300 |
| C | -6.05462200  | -5.21105400 | 6.40637600   | C | -6.55187400 | -2.49824200 | 10.93848600 |
| N | -4.52639100  | 3.40838300  | -5.10033700  | O | -3.67503800 | 3.33080400  | -8.98388200 |
| C | -3.26364400  | 0.01871100  | 4.30277900   | O | -5.90157700 | 2.96530900  | -9.40413800 |
| H | -4.08057700  | 1.50642800  | 2.97578700   | N | -2.57356800 | -2.69942600 | 8.69079500  |
| C | -2.97638000  | -2.21250800 | 3.34438700   | H | -0.82328400 | -3.01660100 | 7.48879200  |
| H | -3.51672100  | -2.41588900 | 1.26808400   | H | -1.89917300 | -4.44327200 | 7.71078000  |
| C | -1.77828100  | 0.70957100  | -1.99405100  | C | -0.92514000 | 2.71720100  | -6.65250700 |

|   |             |             |              |   |             |             |              |
|---|-------------|-------------|--------------|---|-------------|-------------|--------------|
| H | 0.33084000  | 1.07260000  | -6.26824100  | H | -1.86229800 | 2.59234800  | -9.37255200  |
| C | 1.41398600  | -0.12106800 | 4.65124600   | O | 0.89994400  | -2.16212100 | 6.59121200   |
| H | 1.20984000  | 2.03863800  | 4.76449800   | C | 2.21365100  | -1.05328400 | 8.28802600   |
| H | 1.45773300  | -2.25688100 | 4.27863500   | N | 4.00624500  | 0.24845800  | -6.02582000  |
| C | 2.59820300  | -0.94360800 | -2.78397600  | C | 5.13420700  | 1.90133500  | 3.95305500   |
| C | 2.94838100  | 1.45682300  | -2.64473800  | H | 3.99135400  | 2.55326800  | 2.24947300   |
| H | 2.34280900  | 1.26096400  | 1.22767200   | C | 6.09527000  | -0.33810900 | 3.79792500   |
| H | -8.49525600 | -5.27249600 | 11.76557600  | H | 5.67153600  | -1.41432500 | 1.97966800   |
| H | -9.01420200 | -3.63234300 | 11.38106600  | C | 6.74909600  | -0.39168500 | -2.06952400  |
| H | -8.12411300 | -3.94482700 | 12.88497900  | C | -4.31798800 | 0.39945000  | 11.44572700  |
| H | -4.80657700 | -4.63892500 | 11.08819900  | C | -1.79964900 | 0.57361100  | 11.15489300  |
| H | -5.94684400 | -5.86454800 | 11.64842600  | C | -3.35080300 | 1.46149400  | 9.34895500   |
| H | -5.51190200 | -4.51110400 | 12.70604100  | O | 0.19420600  | 0.17629800  | -8.78604400  |
| H | -5.60004300 | -2.35374800 | 10.39587600  | O | -1.62256300 | 0.34992600  | -10.18205000 |
| H | -6.45544900 | -2.00061100 | 11.90764300  | N | 1.36141700  | -0.15260000 | 9.08619500   |
| H | -7.32289300 | -1.97511500 | 10.36115900  | H | 3.27192300  | -0.67620000 | 8.25096300   |
| C | -5.64436200 | 1.90842300  | -10.43254000 | H | 2.24390400  | -2.05700500 | 8.77871300   |
| C | -2.37809800 | -1.34268000 | 8.92291800   | C | 3.37136400  | 0.93194900  | -7.05225400  |
| H | -3.43768200 | -3.15500500 | 9.03490700   | H | 4.89096900  | -0.26688400 | -6.19264800  |
| O | -1.82928700 | 3.44845400  | -6.26593200  | C | 5.89738200  | 0.86057800  | 4.50290000   |
| C | -0.23575200 | 2.89735000  | -8.01274600  | H | 4.97697900  | 2.82097600  | 4.51464500   |
| N | 1.94868900  | -0.20629600 | 5.98359400   | H | 6.68087900  | -1.14385800 | 4.23693800   |
| C | 3.09416100  | -0.94688400 | -4.08783100  | C | 6.95071200  | -1.75244600 | -2.34997600  |
| H | 2.26223000  | -1.87546200 | -2.33034100  | C | 6.98488300  | 0.56908500  | -3.06636300  |
| C | 3.42279600  | 1.47022300  | -3.95637500  | H | -4.20302000 | -0.42896600 | 12.15703800  |
| H | 2.89099400  | 2.38640900  | -2.07839400  | H | -5.26889800 | 0.23633200  | 10.92178100  |
| C | 4.76672800  | 0.55151600  | 1.96374900   | H | -4.39898800 | 1.32976300  | 12.01626700  |
| C | -7.08140800 | 1.53272100  | -10.78669900 | H | -0.96744400 | 0.55572600  | 10.42714600  |
| C | -4.88802700 | 2.54339300  | -11.58914900 | H | -1.62396300 | -0.24331400 | 11.86319800  |
| C | -4.88493900 | 0.76990600  | -9.77034300  | H | -1.69913000 | 1.52541800  | 11.69714100  |
| O | -1.53526700 | -0.63351500 | 8.38011200   | H | -2.50976800 | 1.43714000  | 8.63549800   |
| O | -3.25105100 | -0.92681700 | 9.88567200   | H | -3.42394500 | 2.48249600  | 9.73555100   |
| N | -0.95442200 | 2.18928200  | -9.08321400  | H | -4.26106900 | 1.25209700  | 8.77477300   |
| H | 0.83873500  | 2.55639300  | -7.96928500  | C | -1.43830000 | -1.01276700 | -10.77665400 |
| H | -0.21806300 | 3.98655000  | -8.25881900  | C | 1.93625900  | 0.94141900  | 9.71827000   |
| C | 1.62034700  | -1.21800100 | 6.88090900   | H | 0.33987500  | -0.19259800 | 8.92293900   |
| H | 2.63106300  | 0.52466500  | 6.25536900   | O | 2.37829400  | 1.62519800  | -6.86503400  |
| C | 3.50338700  | 0.26428400  | -4.67056900  | C | 3.97468800  | 0.73769900  | -8.45021000  |
| H | 3.15436400  | -1.87639500 | -4.65112500  | N | 6.50797500  | 1.01965400  | 5.80511000   |
| H | 3.71510900  | 2.40681900  | -4.43032100  | C | 7.41580300  | -2.15404200 | -3.60238700  |
| C | 4.57689700  | 1.74294800  | 2.68325500   | H | 6.74494700  | -2.49998400 | -1.58446700  |
| C | 5.52688100  | -0.48645800 | 2.53391900   | C | 7.41763900  | 0.17854900  | -4.33192100  |
| H | 4.39731600  | -0.94556200 | -1.09176100  | H | 6.81871500  | 1.62469100  | -2.85027200  |
| H | -7.59400400 | 2.34547400  | -11.31478000 | C | -2.58188800 | -1.01177900 | -11.78865800 |
| H | -7.66677700 | 1.32895900  | -9.87887200  | C | -0.07001300 | -1.08121500 | -11.43423300 |
| H | -7.11398200 | 0.64039300  | -11.41913400 | C | -1.62775500 | -2.03132000 | -9.66245300  |
| H | -3.86189700 | 2.81494700  | -11.29028900 | O | 3.12184900  | 1.09727200  | 9.96276600   |
| H | -5.37180100 | 3.46538800  | -11.93185500 | O | 0.93668700  | 1.79749000  | 10.11111400  |
| H | -4.81036800 | 1.86401200  | -12.44330500 | N | 3.14455100  | -0.20340500 | -9.22565900  |
| H | -3.88156700 | 1.09376500  | -9.43732000  | H | 5.04655300  | 0.39118600  | -8.41093700  |
| H | -4.71482000 | -0.06628100 | -10.46633300 | H | 3.98039000  | 1.72319900  | -8.97565600  |
| H | -5.40997000 | 0.38480200  | -8.89046000  | C | 5.76145800  | 1.02117500  | 6.97580000   |
| C | -3.14736500 | 0.45172500  | 10.46726700  | H | 7.53815900  | 1.14681700  | 5.82104100   |
| C | -0.70965100 | 0.83426300  | -9.28241700  | C | 7.64614600  | -1.18358400 | -4.59301700  |

|   |             |             |              |   |             |             |              |
|---|-------------|-------------|--------------|---|-------------|-------------|--------------|
| H | 7.58961800  | -3.20805300 | -3.81186500  | H | 3.89537300  | -4.66473600 | -11.97425500 |
| H | 7.57058200  | 0.91879100  | -5.11846700  | H | 4.58312000  | -3.97134200 | -8.87595700  |
| H | -2.42151400 | -0.25785300 | -12.56952900 | H | 3.79463200  | -5.47967900 | -9.32980600  |
| H | -3.54218900 | -0.76217800 | -11.30342700 | H | 2.99654600  | -4.36569900 | -8.19256000  |
| H | -2.68715900 | -1.98785400 | -12.27081800 | C | 5.89954100  | 5.29204400  | 10.85384600  |
| H | 0.73646300  | -1.23352600 | -10.69155000 | C | 7.86010600  | -4.05190900 | -8.57190700  |
| H | 0.16719900  | -0.15491000 | -11.97144000 | H | 6.68571000  | -2.50412900 | -9.38801800  |
| H | -0.00402600 | -1.90577200 | -12.15030400 | C | 4.66154800  | 5.59570700  | 11.69391000  |
| H | -0.82716400 | -1.93814500 | -8.90865000  | C | 7.14166400  | 5.06772300  | 11.70356000  |
| H | -1.60536200 | -3.05625600 | -10.04385900 | C | 6.11398600  | 6.28768300  | 9.72384800   |
| H | -2.57780600 | -1.88430800 | -9.13642600  | O | 8.77876900  | -4.42904900 | -7.85855400  |
| C | 1.27699400  | 3.04716000  | 10.86105800  | O | 6.94876000  | -4.88196200 | -9.17193100  |
| C | 3.65628500  | -1.47110700 | -9.49147500  | H | 4.48715500  | 4.80826000  | 12.43928100  |
| H | 2.11618000  | -0.06965200 | -9.16467700  | H | 3.75386500  | 5.64042200  | 11.07051300  |
| O | 4.54492400  | 0.87916900  | 6.98163400   | H | 4.76352200  | 6.54910800  | 12.22044100  |
| C | 6.58589900  | 1.15827900  | 8.26116800   | H | 8.01450000  | 4.81740600  | 11.07943400  |
| N | 8.13307600  | -1.60783300 | -5.87962700  | H | 7.00549500  | 4.23627100  | 12.40579400  |
| C | -0.11961000 | 3.64304600  | 11.02575500  | H | 7.39991800  | 5.95874600  | 12.28416400  |
| C | 1.91452300  | 2.65034800  | 12.18387700  | H | 6.99900000  | 6.01971500  | 9.11882400   |
| C | 2.18377200  | 3.89568800  | 9.98504900   | H | 6.27288900  | 7.30084500  | 10.10424300  |
| O | 4.83498600  | -1.78963000 | -9.48003500  | H | 5.25881400  | 6.30922900  | 9.03908900   |
| O | 2.63096700  | -2.30356900 | -9.86102400  | C | 7.13742300  | -6.36610100 | -9.10663500  |
| N | 5.89813200  | 2.01140600  | 9.24140600   | C | 6.01650300  | -6.81578700 | -10.04081000 |
| H | 7.62639100  | 1.54774700  | 8.06094000   | C | 8.51826100  | -6.71491900 | -9.63797200  |
| H | 6.71939900  | 0.13989500  | 8.70318300   | C | 6.91849200  | -6.79016100 | -7.66168600  |
| C | 7.63296100  | -1.11731700 | -7.07922400  | H | 6.18296500  | -6.45366200 | -11.06326900 |
| H | 8.94360200  | -2.25640100 | -5.88284000  | H | 5.04137300  | -6.40947800 | -9.71931400  |
| H | -0.79489100 | 2.93846500  | 11.53904700  | H | 5.93801300  | -7.90623400 | -10.07173600 |
| H | -0.57639800 | 3.85902200  | 10.05145700  | H | 9.30903800  | -6.50202200 | -8.89346200  |
| H | -0.08921200 | 4.57161600  | 11.60286000  | H | 8.76439600  | -6.13456600 | -10.53518600 |
| H | 2.90009200  | 2.18052900  | 12.01984900  | H | 8.59786000  | -7.77554500 | -9.89512400  |
| H | 1.30320600  | 1.91987600  | 12.72564000  | H | 7.71586600  | -6.38959600 | -7.01272200  |
| H | 2.06818800  | 3.51497800  | 12.83562700  | H | 6.91748200  | -7.87859300 | -7.55498200  |
| H | 3.17924100  | 3.42692100  | 9.86142400   | H | 5.96869000  | -6.40929300 | -7.26892200  |
| H | 2.36531400  | 4.88710300  | 10.42183200  | H | 6.50595200  | 1.63879600  | 0.69171300   |
| H | 1.76933700  | 4.03335100  | 8.98086900   | C | 8.88698900  | 1.29581900  | 1.68192700   |
| C | 2.92754300  | -3.71234200 | -10.27209500 | C | 8.95662900  | 2.69407900  | 1.79027700   |
| C | 6.37998600  | 3.29033800  | 9.47048000   | C | 9.27652000  | 0.49332600  | 2.76675100   |
| H | 4.92475100  | 1.75450500  | 9.48970400   | H | 8.69009200  | -1.10053500 | -0.77491200  |
| O | 6.69558100  | -0.32851500 | -7.12871700  | C | 9.42660500  | 3.29031100  | 2.96025700   |
| C | 8.34449800  | -1.64299000 | -8.33405600  | H | 8.64403100  | 3.31813600  | 0.95317300   |
| C | 1.50873100  | -4.21375800 | -10.53132500 | C | 9.72185600  | 1.07578900  | 3.95138900   |
| C | 3.78827500  | -3.67290800 | -11.52524300 | H | 9.22440100  | -0.59229300 | 2.68143000   |
| C | 3.59830100  | -4.42012600 | -9.10511200  | C | 11.04837100 | -0.79451500 | -1.82463300  |
| O | 7.45920600  | 3.72948100  | 9.09475900   | C | 9.80401900  | 2.47623400  | 4.04374800   |
| O | 5.49040000  | 3.98459900  | 10.24942200  | H | 9.49197400  | 4.37404800  | 3.03369300   |
| N | 7.59648800  | -2.74310700 | -8.95946100  | H | 10.00650600 | 0.45327900  | 4.80171100   |
| H | 9.39873400  | -1.96894800 | -8.09939200  | C | 11.19246500 | -2.18917300 | -1.74777800  |
| H | 8.42339200  | -0.80519500 | -9.06900000  | C | 11.38250300 | -0.12189000 | -3.01146200  |
| H | 1.07334600  | -3.75196700 | -11.42543300 | H | 10.77919300 | 1.89584800  | 0.28952300   |
| H | 0.84626500  | -3.95964700 | -9.69152000  | N | 10.29106700 | 3.10324100  | 5.24203200   |
| H | 1.48907500  | -5.29964100 | -10.66355400 | C | 11.68770100 | -2.90784100 | -2.83601000  |
| H | 4.80213700  | -3.30282800 | -11.29755100 | H | 10.91810200 | -2.71298200 | -0.83275400  |
| H | 3.36940100  | -3.00041400 | -12.28283700 | C | 11.85154900 | -0.83228700 | -4.11573900  |

|   |             |             |             |   |             |             |             |
|---|-------------|-------------|-------------|---|-------------|-------------|-------------|
| H | 11.26453900 | 0.96017500  | -3.07122100 | H | 10.72118400 | -4.84153100 | -7.90302400 |
| C | 13.15673800 | 1.81936000  | 1.33333300  | O | 13.49113300 | 3.65180300  | 6.09616900  |
| C | 10.03425300 | 2.62149200  | 6.52221900  | C | 14.68606800 | 5.73822800  | 6.39624100  |
| H | 10.89062900 | 3.93853500  | 5.12536200  | N | 16.49797600 | -4.50144200 | -3.84308200 |
| C | 12.01182100 | -2.22404200 | -4.01991400 | C | 18.09772300 | 4.50824200  | 0.74660100  |
| H | 11.81212800 | -3.98723300 | -2.77150800 | H | 17.54455100 | 3.37295100  | -0.99918400 |
| H | 12.07914000 | -0.31884200 | -5.04975800 | C | 17.93531800 | 3.32423800  | 2.87908500  |
| C | 13.33723300 | 3.17276500  | 1.00749900  | H | 17.32576100 | 1.26141100  | 2.75786100  |
| C | 13.43017600 | 1.37225500  | 2.63601300  | C | 19.50244200 | -1.58950100 | -0.90892900 |
| H | 12.91012600 | -1.18950800 | -0.28867000 | C | 8.11386800  | 8.68512600  | 7.74328800  |
| O | 9.30045800  | 1.66224800  | 6.73268500  | C | 10.60681900 | 8.72492600  | 7.25361100  |
| C | 10.73929700 | 3.39007300  | 7.64861900  | C | 8.97575000  | 7.89458000  | 5.48625300  |
| N | 12.51913900 | -2.98005500 | -5.14043400 | O | 13.27760100 | -6.56152100 | -6.91999300 |
| C | 13.80545000 | 4.07167000  | 1.96439400  | O | 11.13164800 | -7.17025000 | -7.46776600 |
| H | 13.11080600 | 3.52264600  | 0.00079700  | N | 13.82298000 | 6.92032700  | 6.21491800  |
| C | 13.86690900 | 2.26600800  | 3.61176500  | H | 15.75107000 | 5.97514400  | 6.11491400  |
| H | 13.28756100 | 0.32136300  | 2.88848400  | H | 14.69373300 | 5.47265500  | 7.48032100  |
| C | 15.24620700 | -1.28822500 | -1.39009300 | C | 16.04290300 | -4.72362600 | -5.13628900 |
| N | 10.02752400 | 4.62661900  | 8.00342100  | H | 17.22146200 | -5.13000900 | -3.44389700 |
| H | 11.80838700 | 3.61393100  | 7.36165000  | C | 18.21907600 | 4.48985000  | 2.14857300  |
| H | 10.78363900 | 2.73413300  | 8.55231000  | H | 18.32092500 | 5.41147200  | 0.18322600  |
| C | 11.91648600 | -2.95572600 | -6.38968500 | H | 18.00238400 | 3.33046300  | 3.96916300  |
| H | 13.39928300 | -3.50746900 | -4.98560600 | C | 19.72942400 | -2.64220500 | -0.00871600 |
| C | 14.05972600 | 3.61592500  | 3.27232100  | C | 19.66184700 | -1.80210600 | -2.28750900 |
| H | 13.96133900 | 5.11624900  | 1.70323000  | H | 19.35309600 | 1.82950500  | -0.80391100 |
| H | 14.04268200 | 1.92902100  | 4.63618300  | H | 8.32702100  | 8.71757300  | 8.81958500  |
| C | 15.43057600 | -2.56982300 | -0.84689600 | H | 7.19200900  | 8.10057400  | 7.62124100  |
| C | 15.47611200 | -1.07126000 | -2.75811900 | H | 7.91465900  | 9.70632400  | 7.40405000  |
| H | 15.04787700 | 1.94378500  | -0.23182400 | H | 11.39803500 | 8.36958100  | 6.56813300  |
| C | 10.18621100 | 5.75626800  | 7.20889500  | H | 10.95040000 | 8.52033500  | 8.27492900  |
| H | 9.16336400  | 4.51794500  | 8.56504900  | H | 10.55183400 | 9.81180300  | 7.13585500  |
| O | 10.92144700 | -2.28056000 | -6.62767100 | H | 9.81116800  | 7.39335200  | 4.96994500  |
| C | 12.57439600 | -3.84493700 | -7.45336000 | H | 8.81167700  | 8.85996200  | 4.99822400  |
| N | 14.51119500 | 4.57124200  | 4.24358600  | H | 8.08323000  | 7.27906300  | 5.31917200  |
| C | 15.85920500 | -3.62383900 | -1.65299300 | C | 11.37507900 | -8.62732800 | -7.22714000 |
| H | 15.23761200 | -2.74217600 | 0.21175100  | C | 14.05804600 | 7.74423500  | 5.11075100  |
| C | 15.87300300 | -2.12312000 | -3.58202600 | H | 12.84116700 | 6.80966900  | 6.53670000  |
| H | 15.33044100 | -0.07655200 | -3.18017600 | O | 15.21288900 | -4.00496000 | -5.68218400 |
| C | 17.40252300 | 2.18371600  | 0.80169500  | C | 16.63907700 | -5.96433300 | -5.81739800 |
| O | 11.03532900 | 5.91366400  | 6.33712600  | N | 18.64782900 | 5.69562200  | 2.80528100  |
| O | 9.27438200  | 6.69683200  | 7.59357400  | C | 20.13043600 | -3.89344300 | -0.47431900 |
| N | 11.72885300 | -5.01866400 | -7.73064900 | H | 19.58918300 | -2.48174600 | 1.06008300  |
| H | 13.61670200 | -4.16149600 | -7.16099100 | C | 20.02944600 | -3.05774300 | -2.76978100 |
| H | 12.67970900 | -3.24999200 | -8.39329600 | H | 19.48103600 | -0.98468600 | -2.98606400 |
| C | 14.16874300 | 4.53526400  | 5.59335200  | C | 21.72837200 | 2.34026700  | 0.08379300  |
| H | 15.16491800 | 5.30329100  | 3.91155700  | C | 9.98645900  | -9.17946900 | -7.54144500 |
| C | 16.07101100 | -3.39810600 | -3.02542300 | C | 12.44052400 | -9.10423700 | -8.20196400 |
| H | 16.01818500 | -4.61187800 | -1.22486800 | C | 11.76281100 | -8.81428900 | -5.76816000 |
| H | 16.01833100 | -1.96467900 | -4.65226700 | O | 15.04743200 | 7.72840000  | 4.39031700  |
| C | 17.67178900 | 3.35793800  | 0.08301500  | O | 13.03053900 | 8.63792000  | 4.99910900  |
| C | 17.54276800 | 2.17259200  | 2.19931700  | N | 15.83227500 | -7.16332400 | -5.53797800 |
| H | 17.18202700 | -1.16979100 | 0.11558300  | H | 17.70766500 | -6.12459700 | -5.49774300 |
| C | 9.27133000  | 8.05899100  | 6.96939000  | H | 16.65182600 | -5.79478300 | -6.92136800 |
| C | 12.15448000 | -6.27155100 | -7.30693900 | C | 18.16478600 | 6.13051100  | 4.03534000  |

|   |             |              |             |   |             |              |             |
|---|-------------|--------------|-------------|---|-------------|--------------|-------------|
| H | 19.41343900 | 6.21779900   | 2.34464000  | O | 19.27344500 | -5.53014800  | -4.13299000 |
| C | 20.26926700 | -4.09928500  | -1.85928600 | C | 20.65234200 | -7.46518700  | -3.66501500 |
| H | 20.32192200 | -4.70219100  | 0.22764000  | N | 22.53227300 | 6.44765100   | 0.68738500  |
| H | 20.11190600 | -3.23878100  | -3.84298200 | C | 24.34244200 | -3.81512100  | 1.10555700  |
| C | 22.21129300 | 3.13035900   | -0.96663800 | H | 24.11027500 | -1.86438300  | 1.99603800  |
| C | 21.63388700 | 2.88365500   | 1.37753900  | C | 24.00077300 | -3.92786900  | -1.31007700 |
| H | 21.39780200 | -0.99462400  | 0.70981000  | H | 23.51910400 | -2.06564500  | -2.27259000 |
| H | 9.74094000  | -9.07112200  | -8.60517900 | C | 13.78582700 | -10.52645700 | -3.34475900 |
| H | 9.21333800  | -8.63381800  | -6.98236000 | C | 16.32052500 | -10.55003000 | -3.18710100 |
| H | 9.91211900  | -10.23961100 | -7.28119600 | C | 14.96882500 | -8.95571100  | -1.73591100 |
| H | 13.42070500 | -8.65548700  | -7.97237200 | O | 19.40130100 | 9.41541000   | 2.50776000  |
| H | 12.19963000 | -8.82394300  | -9.23425000 | O | 17.21644600 | 10.12173900  | 2.53523100  |
| H | 12.56127900 | -10.19142200 | -8.16738500 | N | 19.74233200 | -8.45730400  | -3.06484300 |
| H | 12.77235300 | -8.41717600  | -5.56057600 | H | 21.70158100 | -7.59583800  | -3.27942700 |
| H | 11.76779800 | -9.87175700  | -5.48737200 | H | 20.69359900 | -7.64285200  | -4.76747100 |
| H | 11.07266500 | -8.28724300  | -5.09916000 | C | 21.98186900 | 7.21781200   | 1.71164400  |
| C | 13.09900900 | 9.74702300   | 3.99201500  | H | 23.00706100 | 6.93408200   | -0.10067900 |
| C | 16.00161600 | -7.82156800  | -4.32400800 | C | 24.25839200 | -4.56490700  | -0.08349300 |
| H | 14.92601200 | -7.23187900  | -6.03506000 | H | 24.59210000 | -4.29674000  | 2.04924800  |
| O | 17.33874600 | 5.51057700   | 4.68908000  | H | 23.97350800 | -4.50399600  | -2.23917500 |
| C | 18.73131800 | 7.48216700   | 4.49942300  | H | 13.82906600 | -10.97377900 | -4.34638700 |
| N | 20.66942300 | -5.40613800  | -2.31104900 | H | 12.89458200 | -9.88599200  | -3.31847500 |
| C | 22.51486600 | 4.47654200   | -0.75150500 | H | 13.64375200 | -11.33256600 | -2.61812300 |
| H | 22.32736300 | 2.70034500   | -1.96094900 | H | 17.20740800 | -10.00327500 | -2.81765200 |
| C | 21.92824300 | 4.22469400   | 1.60610500  | H | 16.51739000 | -10.80847500 | -4.23472400 |
| H | 21.29634300 | 2.25643200   | 2.20429900  | H | 16.26380900 | -11.48471800 | -2.62040500 |
| C | 23.73459700 | -1.81780700  | -0.13128100 | H | 15.87840000 | -8.35238700  | -1.57537900 |
| C | 11.78387900 | 10.45624700  | 4.30480600  | H | 14.85820400 | -9.62675500  | -0.87906600 |
| C | 14.32113200 | 10.59843600  | 4.29290300  | H | 14.12201500 | -8.25912100  | -1.72995600 |
| C | 13.12003800 | 9.11951100   | 2.60655000  | C | 17.43597500 | 11.17311100  | 1.48955700  |
| O | 16.92124400 | -7.65528400  | -3.53219900 | C | 20.12083300 | -9.09138000  | -1.88789900 |
| O | 14.99840800 | -8.73861300  | -4.17085500 | H | 18.73480000 | -8.36361800  | -3.29903600 |
| N | 17.86427700 | 8.58661500   | 4.05089900  | O | 21.34623700 | 6.74559000   | 2.64408000  |
| H | 19.78953600 | 7.63179300   | 4.14740500  | C | 22.23886300 | 8.73163600   | 1.60627600  |
| H | 18.76273200 | 7.48837500   | 5.61642300  | N | 24.42750600 | -5.99013300  | -0.00226400 |
| C | 20.12512900 | -6.04277500  | -3.41926800 | C | 16.01961900 | 11.73104800  | 1.38062400  |
| H | 21.44938400 | -5.84940000  | -1.79267400 | C | 18.43616200 | 12.18367300  | 2.02725700  |
| C | 22.32616400 | 5.03510900   | 0.52811200  | C | 17.89537700 | 10.48766500  | 0.21125400  |
| H | 22.87292300 | 5.08877000   | -1.57720200 | O | 21.25225500 | -9.12734500  | -1.42049600 |
| H | 21.82364700 | 4.64659900   | 2.61010900  | O | 19.04240200 | -9.74946300  | -1.35948400 |
| C | 24.07488300 | -2.44487700  | 1.07478900  | N | 21.41494300 | 9.36199400   | 0.56569500  |
| C | 23.74612600 | -2.55942200  | -1.32691100 | H | 23.32096500 | 8.93938800   | 1.43233500  |
| H | 11.81319400 | 10.94229000  | 5.28758400  | H | 21.95830600 | 9.19376800   | 2.59074200  |
| H | 10.94859900 | 9.74183600   | 4.32859000  | C | 23.89274600 | -6.89824700  | -0.91348800 |
| H | 11.55509500 | 11.21942000  | 3.55437600  | H | 24.85952000 | -6.35321900  | 0.87169200  |
| H | 15.24862200 | 10.13739500  | 3.90702100  | H | 15.73011900 | 12.27716000  | 2.28689300  |
| H | 14.46057300 | 10.73628000  | 5.37222500  | H | 15.28754900 | 10.92141500  | 1.25057900  |
| H | 14.24333000 | 11.59154200  | 3.83931400  | H | 15.92570900 | 12.41393600  | 0.53002500  |
| H | 14.05723100 | 8.56286200   | 2.43886600  | H | 19.43668700 | 11.73862800  | 2.14638400  |
| H | 13.03894300 | 9.87492900   | 1.81937200  | H | 18.14106600 | 12.56030200  | 3.01444200  |
| H | 12.29806100 | 8.40559100   | 2.47457900  | H | 18.53815700 | 13.04465300  | 1.35811500  |
| C | 15.05082500 | -9.72661300  | -3.04443600 | H | 18.91281300 | 10.07144400  | 0.30896800  |
| C | 18.26796900 | 9.35915900   | 2.96871000  | H | 17.92212800 | 11.18342000  | -0.63469800 |
| H | 16.85406500 | 8.49896400   | 4.27156000  | H | 17.23609700 | 9.65433800   | -0.05953600 |

|   |              |              |             |
|---|--------------|--------------|-------------|
| C | 19.22032800  | -10.64879000 | -0.17382700 |
| C | 21.71849700  | 9.17412900   | -0.77731000 |
| H | 20.47350800  | 9.69393100   | 0.85307500  |
| O | 23.30276200  | -6.56215900  | -1.93216400 |
| C | 24.10584000  | -8.38258200  | -0.56805400 |
| C | 17.78471500  | -11.13658600 | 0.00025500  |
| C | 20.18666600  | -11.75909900 | -0.55345500 |
| C | 19.69734000  | -9.80487200  | 0.99871600  |
| O | 22.70799600  | 8.59905300   | -1.21351200 |
| O | 20.73798600  | 9.75495300   | -1.52976600 |
| N | 23.23895700  | -8.82733300  | 0.53183600  |
| H | 25.17731800  | -8.58391800  | -0.33141300 |
| H | 23.84008800  | -8.98524100  | -1.47765500 |
| H | 17.47587000  | -11.78757100 | -0.82707200 |
| H | 17.08218300  | -10.29121700 | 0.01599600  |
| H | 17.66524400  | -11.69561100 | 0.93388500  |
| H | 21.20217700  | -11.36920900 | -0.72731100 |
| H | 19.88181900  | -12.26313500 | -1.47881000 |
| H | 20.25724600  | -12.51803200 | 0.23291600  |
| H | 20.72923500  | -9.44158400  | 0.85359100  |
| H | 19.69535900  | -10.37381800 | 1.93502300  |
| H | 19.06653300  | -8.91942600  | 1.14201400  |
| C | 20.87097000  | 9.81864400   | -3.02498400 |
| C | 23.51149700  | -8.44098000  | 1.83848800  |
| H | 22.29627800  | -9.17787700  | 0.27079700  |
| C | 19.58684200  | 10.57182200  | -3.35909600 |
| C | 22.12978500  | 10.60148700  | -3.35718100 |
| C | 20.88568600  | 8.39508600   | -3.55715200 |
| O | 24.50244200  | -7.82493400  | 2.21091200  |
| O | 22.49828100  | -8.87990000  | 2.64231300  |
| H | 19.57027500  | 11.56295600  | -2.88831400 |
| H | 18.70143000  | 10.03210800  | -2.99953200 |
| H | 19.48147800  | 10.71032700  | -4.44075600 |
| H | 23.03509800  | 10.05633500  | -3.04067000 |
| H | 22.15178600  | 11.57344700  | -2.85008500 |
| H | 22.22024400  | 10.78394900  | -4.43325700 |
| H | 21.79506400  | 7.86004900   | -3.23727100 |
| H | 20.86403300  | 8.37376300   | -4.65206900 |
| H | 20.02920600  | 7.81484100   | -3.19471100 |
| C | 22.59201800  | -8.71569400  | 4.13279000  |
| C | 21.28244600  | -9.38316400  | 4.54195600  |
| C | 23.82313800  | -9.46268700  | 4.61677100  |
| C | 22.62708100  | -7.22780500  | 4.44112500  |
| H | 21.25469600  | -10.43479800 | 4.22967500  |
| H | 20.41945600  | -8.88862200  | 4.07797600  |
| H | 21.14624900  | -9.35023700  | 5.62852900  |
| H | 24.74883700  | -8.99018200  | 4.24687000  |
| H | 23.83508900  | -10.50110800 | 4.26483400  |
| H | 23.88183000  | -9.47971300  | 5.71022400  |
| H | 23.55714400  | -6.76643700  | 4.07010200  |
| H | 22.57752000  | -7.03818000  | 5.51879100  |
| H | 21.79439700  | -6.69345600  | 3.96925000  |
| H | -27.34343100 | -0.31268100  | 1.33402700  |
| H | 23.85237100  | 0.31073300   | -0.67387400 |

### CHCl<sub>3</sub>

|    |             |             |             |
|----|-------------|-------------|-------------|
| C  | 0.00018500  | 0.00007600  | 0.45569300  |
| H  | 0.00031000  | -0.00040200 | 1.54127000  |
| Cl | -0.98611000 | -1.36839100 | -0.08402700 |
| Cl | 1.67834300  | -0.16958400 | -0.08379000 |
| Cl | -0.69231700 | 1.53797200  | -0.08367800 |

### THF

|   |             |             |             |
|---|-------------|-------------|-------------|
| C | 1.17624200  | 0.46314600  | -0.00000100 |
| O | -0.00000100 | 1.24964900  | 0.00000300  |
| C | -1.17624300 | 0.46314300  | 0.00000000  |
| C | -0.77078500 | -1.02362200 | -0.00000200 |
| C | 0.77078700  | -1.02362100 | 0.00000100  |
| H | 1.77065900  | 0.71922100  | -0.88516300 |
| H | 1.77066500  | 0.71922100  | 0.88515600  |
| H | -1.77066400 | 0.71921600  | 0.88516000  |
| H | -1.77066300 | 0.71921900  | -0.88515900 |
| H | -1.16638000 | -1.53709000 | 0.87920500  |
| H | -1.16637700 | -1.53708600 | -0.87921300 |
| H | 1.16638000  | -1.53708400 | 0.87921100  |
| H | 1.16638300  | -1.53708700 | -0.87920700 |

### 1b-16-mer<sub>RH</sub>

|   |              |             |             |
|---|--------------|-------------|-------------|
| C | -14.32235100 | -1.20319300 | 0.57756300  |
| C | -12.98111900 | -1.22461900 | 0.61657600  |
| C | -12.21150500 | -1.55611000 | -0.59742300 |
| C | -10.90600200 | -1.30195100 | -0.87130300 |
| C | -10.03760300 | -0.53563400 | 0.03762000  |
| C | -8.70111600  | -0.65359400 | 0.24422000  |
| C | -7.86169800  | -1.61735800 | -0.48763000 |
| C | -6.58901400  | -1.42677900 | -0.91535000 |
| C | -5.84360500  | -0.20712400 | -0.56884100 |
| C | -4.52179900  | -0.09803100 | -0.29161900 |
| C | -3.58705200  | -1.22358100 | -0.47401300 |
| C | -2.31156500  | -1.13294400 | -0.91864700 |
| C | -1.69421200  | 0.18752100  | -1.12363700 |
| C | -0.42716400  | 0.55137000  | -0.81610200 |
| C | 0.56935900   | -0.45012500 | -0.41621300 |
| C | 1.90180000   | -0.44964800 | -0.65897000 |
| C | 2.56099600   | 0.73015300  | -1.23294200 |
| C | 3.79649100   | 1.23740800  | -0.98321800 |
| C | 4.77982800   | 0.48026700  | -0.21132000 |
| C | 6.12854200   | 0.59943700  | -0.03933000 |
| C | 6.84418200   | 1.73534300  | -0.61356900 |
| C | 8.12295000   | 2.19555500  | -0.60951500 |
| C | 9.27382600   | 1.52623100  | 0.00664200  |
| C | 9.54417500   | 0.22029000  | -0.13833400 |
| H | -14.90625600 | -0.97942200 | 1.46481300  |
| C | -12.24852200 | -0.90997400 | 1.87762200  |
| C | -12.31632300 | 0.36200200  | 2.45041200  |
| C | -11.35307300 | -1.83318800 | 2.42353600  |
| H | -12.78982900 | -2.04866700 | -1.37875600 |
| C | -11.45617300 | 0.72182400  | 3.48196000  |

|   |              |             |             |   |             |             |             |
|---|--------------|-------------|-------------|---|-------------|-------------|-------------|
| H | -13.00386900 | 1.09514400  | 2.03734000  | H | -5.74570600 | 0.21398900  | 3.76383500  |
| C | -10.50161300 | -1.49634200 | 3.46650200  | C | -5.97422100 | -3.81759600 | -1.43824100 |
| H | -11.27943700 | -2.82265200 | 1.97988700  | C | -5.20664100 | -2.07580900 | -2.89467700 |
| C | -10.29990000 | -1.81136400 | -2.13227700 | H | -6.44149900 | 0.67823000  | -0.38490200 |
| C | -10.52226600 | -0.19308300 | 3.97759700  | N | -6.22230700 | 2.88700500  | 3.97069700  |
| H | -11.48792200 | 1.72741200  | 3.89415200  | C | -5.25048300 | -4.74407900 | -2.17639300 |
| H | -9.79829000  | -2.21542200 | 3.86172600  | H | -6.53004700 | -4.14181100 | -0.56240200 |
| C | -10.39783500 | -3.15918200 | -2.48780500 | C | -4.47648600 | -2.98863100 | -3.64418700 |
| C | -9.47749300  | -0.98820800 | -2.90969700 | H | -5.17756100 | -1.02633200 | -3.17414800 |
| N | -9.60993600  | 0.25403300  | 4.95556300  | C | -4.04495900 | 1.18888200  | 0.28955900  |
| C | -9.63386300  | -3.67664800 | -3.52574600 | C | -5.59373900 | 2.65053600  | 5.15538200  |
| H | -11.02125200 | -3.82231600 | -1.89423400 | H | -6.47849700 | 3.85165900  | 3.80751200  |
| C | -8.71736500  | -1.48380900 | -3.95906700 | C | -4.47341200 | -4.33821800 | -3.26812300 |
| H | -9.38692800  | 0.06187800  | -2.64513100 | H | -5.25954700 | -5.79246900 | -1.88648900 |
| C | -8.90211700  | -0.53031300 | 5.82394400  | H | -3.89359800 | -2.66422500 | -4.49504600 |
| H | -9.39487100  | 1.24783600  | 4.96013800  | C | -4.39667700 | 2.42775000  | -0.25299200 |
| C | -8.75756900  | -2.85493100 | -4.24188200 | C | -3.23666100 | 1.17402400  | 1.43325500  |
| H | -9.68133000  | -4.73915200 | -3.75373600 | H | -3.99451900 | -2.22185200 | -0.35267100 |
| H | -8.06018300  | -0.83849500 | -4.52450400 | O | -5.25397000 | 1.55033100  | 5.55723000  |
| O | -8.95141000  | -1.74482500 | 5.87030700  | C | -5.34574300 | 3.90066600  | 5.99783300  |
| C | -8.00143300  | 0.25546200  | 6.77916800  | N | -3.70871800 | -5.31887800 | -3.91991000 |
| N | -7.93961700  | -3.46565100 | -5.20863200 | C | -3.95262300 | 3.61156800  | 0.32711900  |
| N | -8.70122200  | 1.26707200  | 7.55512400  | H | -5.00395500 | 2.46180200  | -1.15359900 |
| H | -7.18998700  | 0.73384300  | 6.22066900  | C | -2.80114600 | 2.34806700  | 2.02962000  |
| H | -7.56363300  | -0.47061600 | 7.46412900  | H | -2.93859000 | 0.21745500  | 1.85426800  |
| C | -6.93265700  | -2.90428300 | -5.94191000 | C | -1.54933300 | -2.37516200 | -1.21704700 |
| H | -8.03122900  | -4.46951700 | -5.29892300 | N | -6.37564900 | 4.90106600  | 5.80569500  |
| C | -8.84048000  | 2.53685200  | 7.13799300  | H | -4.37660900 | 4.32880100  | 5.71942700  |
| H | -9.10554500  | 1.02478100  | 8.44822100  | H | -5.30051400 | 3.56239700  | 7.03728500  |
| O | -6.62914400  | -1.72713600 | -5.94432900 | C | -3.05641000 | -5.22675600 | -5.11427900 |
| C | -6.14175100  | -3.89396100 | -6.79824200 | H | -3.72613600 | -6.24396300 | -3.51060000 |
| O | -8.48367800  | 2.95342900  | 6.03836300  | C | -3.15601400 | 3.58040900  | 1.47223700  |
| O | -9.43277100  | 3.30224100  | 8.06847900  | H | -4.22286500 | 4.57100300  | -0.10718200 |
| N | -6.85426000  | -5.11636500 | -7.12169300 | H | -2.18941600 | 2.32321000  | 2.92194100  |
| H | -5.22374300  | -4.15508100 | -6.26006000 | C | -1.45582500 | -3.42801600 | -0.30200900 |
| H | -5.84197100  | -3.35743500 | -7.70238700 | C | -0.86211900 | -2.49252400 | -2.43072000 |
| C | -9.64409800  | 4.66308100  | 7.69531400  | H | -2.37058500 | 0.98974900  | -1.39568100 |
| C | -6.32595300  | -6.35081100 | -6.90128200 | C | -6.10841100 | 6.20504000  | 5.58941300  |
| H | -7.59466000  | -5.07766100 | -7.81033800 | H | -7.34423900 | 4.60126300  | 5.88253100  |
| O | -5.33687800  | -6.59222100 | -6.23497300 | O | -2.98707800 | -4.21744200 | -5.79499800 |
| O | -7.07425400  | -7.29408500 | -7.50162500 | C | -2.37461800 | -6.51330500 | -5.57036800 |
| C | -6.61900600  | -8.63131500 | -7.31160900 | N | -2.71809900 | 4.80155900  | 2.03553700  |
| H | -10.54392400 | 0.18735600  | 0.66457900  | C | -0.67832300 | -4.54598300 | -0.58190100 |
| C | -8.09123200  | 0.23546600  | 1.27236000  | H | -1.96445000 | -3.34841800 | 0.65528000  |
| C | -8.43035800  | 1.59093300  | 1.33732800  | C | -0.09970100 | -3.61272800 | -2.73109800 |
| C | -7.13559800  | -0.24222100 | 2.17762400  | H | -0.91509300 | -1.67690300 | -3.14688600 |
| H | -8.35317600  | -2.52847700 | -0.81468900 | C | -0.12057500 | 2.00638600  | -0.78061600 |
| C | -7.81619100  | 2.43669700  | 2.24753300  | O | -4.99883300 | 6.70318400  | 5.49528600  |
| H | -9.15595300  | 1.99377300  | 0.63631600  | O | -7.25411700 | 6.91291800  | 5.47776000  |
| C | -6.50555400  | 0.59308900  | 3.09369000  | N | -3.03242500 | -7.70668300 | -5.07759600 |
| H | -6.85168200  | -1.29048100 | 2.13648100  | H | -1.33690800 | -6.50934200 | -5.21642300 |
| C | -5.93984700  | -2.45881200 | -1.76596800 | H | -2.37182500 | -6.48059800 | -6.66332100 |
| C | -6.83397400  | 1.95389900  | 3.11887000  | C | -2.61968900 | 5.04971300  | 3.37196700  |
| H | -8.07778500  | 3.49235500  | 2.26825300  | H | -2.49600400 | 5.57025500  | 1.40810100  |

|   |             |              |             |   |             |             |             |
|---|-------------|--------------|-------------|---|-------------|-------------|-------------|
| C | 0.00588900  | -4.64805200  | -1.79560500 | C | -4.72664000 | 9.30699000  | 0.71279700  |
| H | -0.59535700 | -5.35138800  | 0.14387800  | C | 0.96079300  | -8.83571300 | -1.08904800 |
| H | 0.41892500  | -3.69158700  | -3.67698100 | H | 0.08737800  | -9.14061300 | -2.90088000 |
| C | -0.42043500 | 2.86444400   | -1.84092300 | O | 0.20617900  | 6.46887300  | 1.76410600  |
| C | 0.42654500  | 2.55558100   | 0.38468500  | C | 0.33170300  | 8.42912800  | 0.37167400  |
| H | 0.17301800  | -1.35950600  | 0.01889000  | N | 4.34217500  | -5.48729900 | 0.41891500  |
| C | -7.06998100 | 8.29745100   | 5.18835300  | C | 4.17442300  | 4.37934000  | -3.10832700 |
| C | -2.34830000 | -8.74522100  | -4.54840700 | H | 4.24149300  | 2.27136800  | -3.51733000 |
| H | -3.99155100 | -7.85653200  | -5.37290200 | C | 3.86106300  | 5.01420700  | -0.79808000 |
| O | -2.81433100 | 4.21311000   | 4.24046400  | H | 3.71529100  | 3.38364900  | 0.58416900  |
| C | -2.27534000 | 6.50163600   | 3.70809400  | C | 6.72527900  | -0.57922900 | 0.67261400  |
| N | 0.78808000  | -5.79899800  | -2.03293400 | O | 1.71551600  | -8.18741200 | -0.36605200 |
| C | -0.18881100 | 4.23085500   | -1.73302100 | O | 0.09411100  | -9.75057100 | -0.60671000 |
| H | -0.82741000 | 2.45382400   | -2.76106700 | N | -0.72884800 | 8.80378300  | -0.54822900 |
| C | 0.64033200  | 3.91980200   | 0.51304400  | H | 1.29284800  | 8.74179100  | -0.04610500 |
| H | 0.68125300  | 1.89406300   | 1.20873500  | H | 0.15984500  | 8.92176100  | 1.32903500  |
| C | 2.61150200  | -1.72675100  | -0.36263200 | C | 4.43548500  | -6.56484200 | -0.40819300 |
| O | -1.15259100 | -8.76554600  | -4.31338900 | H | 4.75867400  | -5.59346000 | 1.34018600  |
| O | -3.17626100 | -9.77819200  | -4.28216400 | C | 4.02471600  | 5.37676000  | -2.13964800 |
| N | -3.34546000 | 7.41399000   | 3.34036000  | H | 4.30581300  | 4.66465200  | -4.14967600 |
| H | -1.35658200 | 6.79533300   | 3.19177200  | H | 3.73648900  | 5.77884300  | -0.04309100 |
| H | -2.13940000 | 6.55713400   | 4.78798400  | C | 7.36596000  | -0.54418400 | 1.91545800  |
| C | 0.96610700  | -6.39890700  | -3.24742700 | C | 6.52563900  | -1.83254800 | 0.08672500  |
| H | 1.20440400  | -6.26351000  | -1.22951400 | C | 0.11443800  | -9.90171200 | 0.81006400  |
| C | 0.32835000  | 4.76918400   | -0.55363800 | C | -0.53053700 | 8.80968400  | -1.87640500 |
| H | -0.42386500 | 4.89288100   | -2.56298000 | H | -1.68098800 | 8.71162800  | -0.20346700 |
| H | 1.04556000  | 4.33487300   | 1.42626300  | O | 4.13225100  | -6.56117400 | -1.59093700 |
| C | 2.64057800  | -2.26398000  | 0.92660800  | C | 4.91292200  | -7.82678000 | 0.31201800  |
| C | 3.17517300  | -2.46580500  | -1.40608300 | N | 4.06015000  | 6.71610800  | -2.57575000 |
| H | 1.90901800  | 1.37223400   | -1.81415600 | C | 7.76011000  | -1.71846800 | 2.54641100  |
| C | -2.54218300 | -10.90259500 | -3.67733700 | H | 7.55522000  | 0.41110500  | 2.39765700  |
| C | -3.45389000 | 7.93105000   | 2.11179800  | C | 6.92774000  | -3.01631100 | 0.69263300  |
| H | -4.11143300 | 7.51978300   | 3.99978300  | H | 6.02685200  | -1.88649100 | -0.87685100 |
| O | 0.58691300  | -5.93104600  | -4.30816200 | O | 0.54363500  | 8.59656900  | -2.43328000 |
| C | 1.66586500  | -7.75710300  | -3.16444900 | O | -1.66457600 | 9.08528100  | -2.54766400 |
| N | 0.51805000  | 6.16587800   | -0.47903500 | N | 3.97256500  | -8.24456100 | 1.33857000  |
| C | 3.22342100  | -3.50033200  | 1.16510300  | H | 5.88245200  | -7.63467800 | 0.78088800  |
| H | 2.21046200  | -1.69756900  | 1.74802300  | H | 5.00325000  | -8.61643300 | -0.43464400 |
| C | 3.73770200  | -3.71792100  | -1.18611900 | C | 3.59943600  | 7.81579600  | -1.91522700 |
| H | 3.15394000  | -2.05771000  | -2.41319700 | H | 4.50950200  | 6.89395500  | -3.47049800 |
| C | 3.97538100  | 2.65948200   | -1.41874000 | C | 7.54014600  | -2.96679800 | 1.94709400  |
| O | -2.67434400 | 7.73130700   | 1.18165800  | H | 8.25760400  | -1.67133600 | 3.51304100  |
| O | -4.54640000 | 8.71661400   | 1.99645300  | H | 6.76197500  | -3.96437800 | 0.20167300  |
| N | 0.88593900  | -8.73403100  | -2.42151000 | C | -1.53201400 | 9.10654200  | -3.96563600 |
| H | 2.64441000  | -7.64412900  | -2.68824500 | C | 4.06867900  | -7.78523000 | 2.59993200  |
| H | 1.78225700  | -8.11666300  | -4.18665400 | H | 3.04744700  | -8.51926900 | 1.01510900  |
| C | 0.36002100  | 6.92466500   | 0.64276700  | O | 3.16873600  | 7.81242300  | -0.77270800 |
| H | 0.73298800  | 6.66273100   | -1.33947100 | C | 3.63562500  | 9.08984200  | -2.76149800 |
| C | 3.76542100  | -4.23912000  | 0.11152200  | N | 7.94071500  | -4.12277200 | 2.64709200  |
| H | 3.25418200  | -3.90901500  | 2.17206700  | O | 4.99081100  | -7.11034400 | 3.04619800  |
| H | 4.14965100  | -4.29417800  | -2.00373000 | O | 3.01195200  | -8.17068400 | 3.34179400  |
| C | 4.13895100  | 3.03666000   | -2.75297200 | N | 2.85570500  | 8.97486700  | -3.98104500 |
| C | 3.84733600  | 3.66651100   | -0.45727800 | H | 4.67347800  | 9.31427900  | -3.02375400 |
| H | 4.35401600  | -0.39565600  | 0.25989600  | H | 3.21800500  | 9.89170300  | -2.15225800 |





|   |             |              |             |   |             |              |             |
|---|-------------|--------------|-------------|---|-------------|--------------|-------------|
| C | 0.94028600  | -12.67144100 | -0.94752400 | H | -3.68126600 | -9.13110200  | 2.95017500  |
| C | 0.96581000  | -11.48803700 | -0.28308200 | C | 7.19133500  | -6.20939600  | -7.24642300 |
| C | 1.96759400  | -10.43988300 | -0.53719800 | H | 5.26502900  | -6.93067400  | -7.23599500 |
| C | 1.87184200  | -9.08981900  | -0.39854200 | O | -1.75026600 | -9.46169900  | 5.42873000  |
| C | 0.65979700  | -8.41791300  | 0.08922200  | C | -3.97678300 | -8.57797500  | 5.35788000  |
| C | 0.52120700  | -7.20995500  | 0.68975800  | O | 8.26054400  | -6.07461900  | -6.67003200 |
| C | 1.64906900  | -6.26706600  | 0.81398500  | O | 6.99469400  | -5.91940600  | -8.54231000 |
| C | 1.60848600  | -4.93768100  | 0.55568100  | N | -5.19071500 | -9.33918500  | 5.11209800  |
| C | 0.33418300  | -4.25260000  | 0.29055100  | H | -4.10791300 | -7.56456600  | 4.96474100  |
| C | -0.03367800 | -2.97366000  | 0.56069600  | H | -3.81461700 | -8.51063300  | 6.43358700  |
| C | 0.90421600  | -1.97900800  | 1.06845400  | C | 8.16988500  | -5.53477800  | -9.25833900 |
| C | 0.82210200  | -0.63020700  | 1.25877500  | C | -5.96069200 | -9.14270000  | 4.03106700  |
| C | -0.41045300 | 0.13596800   | 1.10641500  | H | -5.43798500 | -10.09341100 | 5.73746500  |
| C | -0.68267600 | 1.47503500   | 1.03735500  | O | -5.68973200 | -8.37697300  | 3.10900300  |
| C | 0.33646700  | 2.50615700   | 1.19174300  | O | -7.07701200 | -9.89505400  | 4.07210200  |
| C | 0.30405100  | 3.86347000   | 1.05508700  | C | -7.75793100 | -10.04155300 | 2.82185600  |
| C | -0.89164500 | 4.57093500   | 0.59952300  | H | 2.91123800  | -10.78938400 | -0.93503900 |
| C | -1.32395100 | 5.82194900   | 0.90108200  | C | 3.07480800  | -8.31311600  | -0.81609200 |
| C | -0.48298600 | 6.72216600   | 1.71026700  | C | 4.35003900  | -8.69815600  | -0.38873700 |
| C | -0.23752400 | 8.02901900   | 1.46758000  | C | 2.96598900  | -7.21192500  | -1.67520700 |
| C | -0.97025500 | 8.74411700   | 0.40845600  | H | -0.24839800 | -9.00475100  | 0.02898200  |
| C | -1.54079000 | 9.94525900   | 0.57608200  | C | 5.48517600  | -8.00357600  | -0.78932300 |
| H | 2.41227300  | -14.84928200 | -3.16002300 | H | 4.44844900  | -9.54263200  | 0.28746600  |
| C | 2.70501800  | -12.21103000 | -2.75441300 | C | 4.09441800  | -6.50974400  | -2.08040300 |
| C | 4.08775700  | -12.26285600 | -2.56614400 | H | 1.98304400  | -6.90072000  | -2.01948200 |
| C | 2.17567200  | -11.16420900 | -3.51411400 | C | -0.82729000 | -6.83314100  | 1.20325000  |
| H | 0.19016900  | -13.39091500 | -0.61917200 | C | 5.35582000  | -6.89931000  | -1.62836900 |
| C | 4.90863200  | -11.25417300 | -3.06004300 | H | 6.46974000  | -8.30356300  | -0.44812700 |
| H | 4.51525200  | -13.06940000 | -1.97679100 | H | 4.00801800  | -5.65803000  | -2.75029500 |
| C | 2.98524500  | -10.16122600 | -4.03073500 | C | -1.97774400 | -6.97795400  | 0.41876200  |
| H | 1.10038700  | -11.10874900 | -3.66171700 | C | -0.97414300 | -6.28835700  | 2.48346700  |
| C | -0.05418200 | -11.20061800 | 0.76395600  | H | 2.63085000  | -6.70516700  | 0.96445600  |
| C | 4.36031400  | -10.18582900 | -3.77313300 | N | 6.50319200  | -6.16848500  | -2.04078200 |
| H | 5.98000100  | -11.27897100 | -2.87877900 | C | -3.21318600 | -6.53608700  | 0.87312500  |
| H | 2.56178600  | -9.34756900  | -4.60495100 | H | -1.89181700 | -7.39611500  | -0.58068700 |
| C | -1.41990500 | -11.18269800 | 0.46841200  | C | -2.20951900 | -5.86359700  | 2.96225900  |
| C | 0.35510800  | -10.74221400 | 2.02018800  | H | -0.09449100 | -6.17122100  | 3.11098200  |
| N | 5.22076100  | -9.13853900  | -4.16736500 | C | 2.89400100  | -4.20852000  | 0.37842800  |
| C | -2.32980800 | -10.63792800 | 1.36745700  | C | 7.56925500  | -6.75615100  | -2.62425300 |
| H | -1.76014100 | -11.52611600 | -0.50484000 | H | 6.50473800  | -5.15064000  | -1.94051400 |
| C | -0.54077500 | -10.20936000 | 2.93458600  | C | -3.33753000 | -5.95213900  | 2.13779000  |
| H | 1.41510300  | -10.74256500 | 2.25934200  | H | -4.09058700 | -6.61795100  | 0.23688500  |
| C | 5.04212000  | -8.31645300  | -5.23407600 | H | -2.30040400 | -5.43420500  | 3.95159800  |
| H | 6.04249200  | -8.96837200  | -3.58450800 | C | 3.90012600  | -4.18131400  | 1.34468600  |
| C | -1.89465200 | -10.11520800 | 2.58976600  | C | 3.10125800  | -3.53065100  | -0.83208800 |
| H | -3.38541600 | -10.58390300 | 1.11156500  | H | -0.45761000 | -4.88631700  | -0.09254600 |
| H | -0.20299000 | -9.83222500  | 3.88921200  | O | 7.69144200  | -7.97224500  | -2.78535400 |
| O | 4.13536300  | -8.39100000  | -6.04799100 | C | 8.60842300  | -5.80250500  | -3.19179700 |
| C | 6.10261200  | -7.22614800  | -5.33986800 | N | -4.59801100 | -5.42914700  | 2.49497800  |
| N | -2.84700300 | -9.48485300  | 3.41151400  | C | 5.07538300  | -3.46206600  | 1.12570200  |
| N | 6.05006700  | -6.64174600  | -6.65871000 | H | 3.74723500  | -4.69789400  | 2.28790200  |
| H | 7.10148200  | -7.62811100  | -5.14715500 | C | 4.27173800  | -2.82716500  | -1.06024200 |
| H | 5.88780400  | -6.47693900  | -4.56389600 | H | 2.32197500  | -3.54973200  | -1.59008600 |
| C | -2.72917200 | -9.21991300  | 4.74927100  | C | -1.48292000 | -2.66906000  | 0.35950300  |

|   |             |             |             |   |              |             |             |
|---|-------------|-------------|-------------|---|--------------|-------------|-------------|
| N | 9.92445000  | -6.37753300 | -3.05627700 | H | 5.01074300   | 0.70833600  | -0.20652500 |
| H | 8.58857600  | -4.82933100 | -2.70207500 | C | -2.70464400  | 1.28039300  | -0.40906000 |
| H | 8.35420700  | -5.65939400 | -4.25351900 | C | -2.90371200  | 2.61846600  | 1.57045800  |
| C | -5.08671400 | -5.27678300 | 3.75652700  | H | 1.30684800   | 2.11934600  | 1.46461700  |
| H | -5.20985200 | -5.13821100 | 1.73341300  | C | -10.01845100 | -6.28111800 | 0.83481800  |
| C | 5.25401200  | -2.77567900 | -0.06982200 | C | 10.63533100  | -1.31991300 | -0.56224400 |
| H | 5.85065200  | -3.42215800 | 1.88468000  | H | 9.91863200   | -2.89292600 | -1.66066800 |
| H | 4.43116100  | -2.29655900 | -1.99450300 | O | -6.51977100  | -3.55461500 | 0.96284100  |
| C | -2.00321000 | -2.30016600 | -0.88059300 | C | -7.93396200  | -1.71087900 | 0.31488200  |
| C | -2.34671900 | -2.78249000 | 1.45306100  | N | 5.86977400   | 1.94496200  | 2.01758700  |
| H | 1.89080400  | -2.38069200 | 1.26015900  | C | -4.02732000  | 1.55571400  | -0.74932400 |
| C | 10.91951700 | -5.72337400 | -2.42838600 | H | -2.10528700  | 0.65827300  | -1.06714100 |
| H | 10.01833600 | -7.37481900 | -3.20291200 | C | -4.21971000  | 2.90922500  | 1.23769000  |
| O | -4.44438000 | -5.44053700 | 4.78134100  | H | -2.47154500  | 3.04541100  | 2.47110800  |
| C | -6.56826800 | -4.91400400 | 3.79886000  | C | 1.56493300   | 4.58243500  | 1.39671300  |
| N | 6.42361000  | -1.99153700 | -0.30192400 | O | 10.49135000  | -0.21236000 | -0.05464500 |
| C | -3.35999800 | -2.02101100 | -1.01988100 | O | 11.76042400  | -2.04157700 | -0.41562600 |
| H | -1.33967000 | -2.22176400 | -1.73759500 | N | -9.02479800  | -2.64372600 | 0.33203500  |
| C | -3.69823300 | -2.49637900 | 1.32434900  | H | -7.96142600  | -1.12884600 | -0.60664500 |
| H | -1.94372800 | -3.07797600 | 2.41728100  | H | -7.99421900  | -0.99360000 | 1.14891300  |
| C | 2.15202400  | 0.01005100  | 1.52362200  | C | 7.06878700   | 1.57218900  | 1.51859000  |
| O | 10.88308200 | -4.55038700 | -2.07311400 | H | 5.82334900   | 2.85053500  | 2.49011100  |
| O | 11.97502500 | -6.52959100 | -2.23322200 | C | -4.79354800  | 2.37593700  | 0.07697600  |
| N | -7.32750600 | -5.92885700 | 3.08485100  | H | -4.45730600  | 1.15405200  | -1.65910900 |
| H | -6.74804200 | -3.95206200 | 3.30855100  | H | -4.81759000  | 3.55082500  | 1.87941100  |
| H | -6.85664400 | -4.84216000 | 4.85035900  | C | 2.29225000   | 4.22123800  | 2.53678500  |
| C | 7.31090400  | -2.33053100 | -1.25477000 | C | 2.06857600   | 5.62002700  | 0.60079900  |
| H | 6.58331900  | -1.14683900 | 0.25256500  | H | -1.55951000  | 3.96153300  | 0.00881900  |
| C | -4.20503700 | -2.10562400 | 0.08505700  | C | 12.79987500  | -1.36493400 | 0.29848300  |
| H | -3.77133800 | -1.72973800 | -1.98286600 | C | -10.21252400 | -2.29988900 | -0.19248700 |
| H | -4.36353700 | -2.56342500 | 2.17862900  | H | -8.96253100  | -3.44062800 | 0.96511000  |
| C | 2.51917300  | 0.55587800  | 2.75676000  | O | 7.29310100   | 0.51614300  | 0.93167400  |
| C | 3.07899100  | 0.04522200  | 0.47822600  | C | 8.16087100   | 2.60783300  | 1.73001600  |
| H | -1.29034000 | -0.48697000 | 1.01135400  | N | -6.14404000  | 2.69296800  | -0.22199300 |
| C | 13.11582400 | -5.93908500 | -1.61412100 | C | 3.49519400   | 4.83678100  | 2.86047400  |
| C | -8.45236800 | -5.59861500 | 2.42997900  | H | 1.89496600   | 3.45433800  | 3.19497700  |
| H | -6.89133500 | -6.83330200 | 2.90458600  | C | 3.26899100   | 6.24328600  | 0.91334500  |
| O | 7.24493700  | -3.37403800 | -1.90836000 | H | 1.51034900   | 5.93345000  | -0.27729800 |
| C | 8.42417400  | -1.33694200 | -1.53175400 | C | -2.68623500  | 6.22671400  | 0.46046100  |
| N | -5.56555200 | -1.73514000 | -0.05083400 | O | -10.45441900 | -1.25152100 | -0.78205000 |
| C | 3.76160100  | 1.15980900  | 2.92031400  | O | -11.12178800 | -3.28021000 | -0.01022000 |
| H | 1.81724600  | 0.52696800  | 3.58637400  | N | 9.45132600   | 2.05278100  | 1.42335200  |
| C | 4.31904800  | 0.65414100  | 0.62756300  | H | 8.12579500   | 2.98262900  | 2.75784000  |
| H | 2.80528200  | -0.38947700 | -0.47822300 | H | 7.93837600   | 3.47024500  | 1.08462800  |
| C | -2.11636300 | 1.80196600  | 0.74576000  | C | -7.05049900  | 1.81039200  | -0.70890300 |
| O | -8.99534000 | -4.50374000 | 2.48936800  | H | -6.45967800  | 3.65049500  | -0.05951400 |
| O | -8.93380400 | -6.62911500 | 1.70441200  | C | 3.99881700   | 5.84315500  | 2.03720400  |
| N | 9.71520600  | -1.95514600 | -1.31061400 | H | 4.03867300   | 4.55142000  | 3.75331900  |
| H | 8.35567000  | -0.45589200 | -0.89257100 | H | 3.65694500   | 7.03524400  | 0.27862100  |
| H | 8.31517200  | -1.02465000 | -2.57813900 | C | -3.30722100  | 5.63539700  | -0.65006300 |
| C | -6.60605700 | -2.44693400 | 0.43724500  | C | -3.41760100  | 7.17622300  | 1.18733800  |
| H | -5.77518500 | -0.84493300 | -0.50727400 | C | -12.40647900 | -3.04429000 | -0.58788700 |
| C | 4.65689500  | 1.23065400  | 1.85055300  | C | 10.53463900  | 2.81797100  | 1.63418300  |
| H | 4.04520500  | 1.58995700  | 3.87734800  | H | 9.53574000   | 1.12084700  | 1.01576700  |

|   |              |            |             |   |             |              |              |
|---|--------------|------------|-------------|---|-------------|--------------|--------------|
| O | -6.77094800  | 0.68333700 | -1.10929100 | H | 1.64297700  | 9.63658700   | 0.44874400   |
| C | -8.50114100  | 2.27539400 | -0.61680500 | C | -2.59145400 | 10.41997800  | -0.34089600  |
| N | 5.24148000   | 6.46736300 | 2.31417300  | C | 3.20594400  | 9.57649000   | 3.45569100   |
| C | -4.60166500  | 5.96963600 | -1.01469700 | H | 2.41251100  | 8.70275500   | 5.24983600   |
| H | -2.76744600  | 4.91687700 | -1.25900200 | H | 3.73663600  | 10.40203400  | 1.54450000   |
| C | -4.71045900  | 7.52965200 | 0.81883400  | C | -2.49261800 | 10.27772000  | -1.72869700  |
| H | -2.96121900  | 7.64405500 | 2.05421400  | C | -3.80368000 | 10.86568400  | 0.20075500   |
| O | 10.49550900  | 3.95774600 | 2.09183300  | N | 4.39803800  | 9.98191200   | 4.10124800   |
| O | 11.67418500  | 2.20618100 | 1.28017500  | C | -3.59016700 | 10.51579900  | -2.54490500  |
| N | -9.36756900  | 1.55470500 | -1.50988200 | H | -1.55017300 | 9.96117400   | -2.16642400  |
| H | -8.57893400  | 3.34277600 | -0.83125600 | C | -4.91235800 | 11.08816100  | -0.60475100  |
| H | -8.80892300  | 2.12507600 | 0.42824800  | H | -3.88926100 | 10.99382700  | 1.27727900   |
| C | 6.34643300   | 5.80163000 | 2.73002100  | C | 5.64165500  | 9.77364600   | 3.60129300   |
| H | 5.33437400   | 7.46273100 | 2.09929800  | H | 4.35298000  | 10.18859700  | 5.10001100   |
| C | -5.30761900  | 6.92674300 | -0.28462200 | C | -4.81051900 | 10.89097600  | -1.98252000  |
| H | -5.06716600  | 5.50395600 | -1.87703300 | H | -3.51713000 | 10.38819300  | -3.62174900  |
| H | -5.26350500  | 8.27130700 | 1.38774400  | H | -5.85865000 | 11.40009200  | -0.17773500  |
| C | 12.85771200  | 2.98686800 | 1.45910500  | O | 5.87826500  | 9.32500000   | 2.48237300   |
| C | -10.18738400 | 2.20648900 | -2.35831500 | C | 6.75974100  | 10.07608200  | 4.59929000   |
| H | -9.49832000  | 0.55011600 | -1.40454200 | N | -5.92896200 | 11.07473900  | -2.83194200  |
| O | 6.36809700   | 4.61586300 | 3.04508800  | N | 6.85169700  | 9.02385300   | 5.58928500   |
| C | 7.62961100   | 6.63948300 | 2.72132800  | H | 6.58455300  | 11.03017200  | 5.10649300   |
| N | -6.61160000  | 7.31292600 | -0.69774400 | H | 7.70243600  | 10.12380400  | 4.05179000   |
| O | -10.25842000 | 3.42463900 | -2.49266200 | C | -7.14831200 | 10.52632400  | -2.61139100  |
| O | -10.93558400 | 1.34763100 | -3.06343200 | H | -5.77532100 | 11.47424300  | -3.75926600  |
| N | 8.76001000   | 5.93619000 | 3.25712100  | C | 6.02668900  | 9.00521400   | 6.65896800   |
| H | 7.47326500   | 7.56564800 | 3.27762900  | H | 7.48221000  | 8.23495000   | 5.43421500   |
| H | 7.83527500   | 6.93686300 | 1.68649300  | O | -7.46528200 | 9.93003900   | -1.58411300  |
| C | -7.58037100  | 6.41518700 | -0.96636300 | C | -8.12774300 | 10.69009800  | -3.77378200  |
| H | -6.79658600  | 8.30441300 | -0.86826600 | O | 5.13279400  | 9.81138600   | 6.87527700   |
| C | -11.81619100 | 1.95713500 | -4.00479100 | O | 6.32464500  | 7.97954100   | 7.47655300   |
| C | 9.22011700   | 6.17325700 | 4.50071700  | N | -7.70849400 | 9.96735300   | -4.95637600  |
| H | 9.19365500   | 5.17011600 | 2.73839400  | H | -8.23829300 | 11.74987600  | -4.02541200  |
| O | -7.46582200  | 5.20339200 | -0.78629300 | H | -9.08855800 | 10.29017500  | -3.44887500  |
| C | -8.88249400  | 6.97726100 | -1.52810600 | C | 5.55956000  | 7.93468300   | 8.68018200   |
| O | 8.75509100   | 6.98070500 | 5.29857900  | C | -6.78981800 | 10.47877600  | -5.80280400  |
| O | 10.30195100  | 5.42741000 | 4.77084600  | H | -8.03869700 | 9.01452400   | -5.07463100  |
| N | -9.33243300  | 6.13964900 | -2.61594700 | O | -6.22078300 | 11.55254100  | -5.64912100  |
| H | -8.76168700  | 8.00041700 | -1.88855600 | O | -6.56204600 | 9.65856500   | -6.84037800  |
| H | -9.62716900  | 6.97665900 | -0.72281000 | C | -5.60632900 | 10.14460200  | -7.78090400  |
| C | 10.93685500  | 5.72150400 | 6.01691700  | H | 1.15435000  | -15.16984700 | -1.83274100  |
| C | -9.45138800  | 6.60869200 | -3.86677400 | H | -1.38163300 | 10.49579800  | 1.50361100   |
| H | -9.46634000  | 5.13939500 | -2.45854000 | H | 8.93771800  | -6.30602000  | -9.16975100  |
| O | -9.24268900  | 7.76899400 | -4.21825600 | H | 8.56218900  | -4.58870000  | -8.87970300  |
| O | -9.85877400  | 5.64673700 | -4.71291600 | H | 7.85363000  | -5.42500400  | -10.29421800 |
| C | -10.01279700 | 6.05594600 | -6.07178900 | H | 13.66391600 | -6.76028800  | -1.15327600  |
| H | 0.11131200   | 6.24439400 | 2.48245500  | H | 12.81099400 | -5.20856000  | -0.86142600  |
| C | 0.85698100   | 8.69333600 | 2.21372700  | H | 13.74099600 | -5.45570400  | -2.36909000  |
| C | 1.07447200   | 8.45922000 | 3.57585400  | H | 13.58188100 | -2.10801400  | 0.44580000   |
| C | 1.81158300   | 9.43157500 | 1.50222800  | H | 12.42554200 | -0.99109800  | 1.25284100   |
| H | -1.23028900  | 8.17178100 | -0.47988700 | H | 13.17744400 | -0.52745800  | -0.29671700  |
| C | 2.23630200   | 8.89934600 | 4.19541900  | H | 13.67753500 | 2.34656500   | 1.13624400   |
| H | 0.33109600   | 7.91211700 | 4.14842000  | H | 12.97366300 | 3.26485900   | 2.50928600   |
| C | 2.98462900   | 9.86123700 | 2.10734800  | H | 12.81706700 | 3.88895100   | 0.84239700   |



|   |             |              |             |   |             |             |             |
|---|-------------|--------------|-------------|---|-------------|-------------|-------------|
| C | -7.61467200 | 3.05800300   | 0.36759000  | H | 8.14037500  | -4.76091200 | 0.84923700  |
| C | -8.94126900 | 2.87826100   | 0.35528800  | C | 9.26973800  | 0.64139600  | -0.89560500 |
| H | 15.22794100 | -5.01428400  | -0.76778600 | H | 10.33584500 | -0.53367200 | 0.54778100  |
| C | 12.84209300 | -3.84066800  | -1.22709100 | C | 7.76984000  | -0.56480400 | -2.36019200 |
| C | 13.35619300 | -2.54418800  | -1.29666300 | H | 7.68617100  | -2.67967900 | -2.04409300 |
| C | 11.80628000 | -4.18804200  | -2.09765900 | C | 5.75089800  | -4.05170700 | 1.51476900  |
| H | 12.50920600 | -5.93150000  | 1.54865600  | C | 8.29269200  | 0.64988200  | -1.89884900 |
| C | 12.77219200 | -1.59579400  | -2.12840800 | H | 9.70573500  | 1.58416100  | -0.57320400 |
| H | 14.16596400 | -2.25595700  | -0.63203500 | H | 7.04909800  | -0.56714200 | -3.16747000 |
| C | 11.22092600 | -3.25814200  | -2.94674200 | C | 5.31283200  | -5.21913200 | 0.88146900  |
| H | 11.39400100 | -5.19260000  | -2.05100600 | C | 5.04250400  | -3.60916000 | 2.63632900  |
| C | 10.11315700 | -5.14477900  | 2.17837800  | H | 7.26773000  | -1.04692900 | 0.73983300  |
| C | 11.66857200 | -1.93125000  | -2.91995800 | N | 7.89387000  | 1.90577400  | -2.37737800 |
| H | 13.13941300 | -0.57230500  | -2.13382200 | C | 4.13096200  | -5.83793200 | 1.27602700  |
| H | 10.38641600 | -3.53022400  | -3.57748600 | H | 5.85183400  | -5.58832300 | 0.01283300  |
| C | 9.72164500  | -6.48228900  | 2.07032700  | C | 3.86695400  | -4.21986500 | 3.04924900  |
| C | 9.47256400  | -4.34994300  | 3.13473000  | H | 5.38361100  | -2.71951100 | 3.15790300  |
| N | 11.02258300 | -0.88800800  | -3.60947900 | C | 5.16633000  | 0.18556100  | -0.07697200 |
| C | 8.64647700  | -6.96711400  | 2.80298900  | C | 7.13788900  | 2.20548100  | -3.47422500 |
| H | 10.20494300 | -7.12158500  | 1.33628500  | H | 8.30490700  | 2.70817300  | -1.90214600 |
| C | 8.40732400  | -4.82099300  | 3.88910600  | C | 3.37027200  | -5.30978300 | 2.32571700  |
| H | 9.76883400  | -3.30899900  | 3.23470300  | H | 3.75940200  | -6.70502000 | 0.73512600  |
| C | 10.05692300 | -0.99496600  | -4.57063200 | H | 3.31375000  | -3.83223800 | 3.89415800  |
| H | 11.22391000 | 0.05696900   | -3.28917200 | C | 5.31295700  | 1.22599200  | 0.84250600  |
| C | 7.94242600  | -6.12517200  | 3.67195200  | C | 4.75235300  | 0.50348100  | -1.37476900 |
| H | 8.30615200  | -7.98975600  | 2.65888800  | H | 4.16790500  | -3.12770600 | 0.16870100  |
| H | 7.89184900  | -4.17780900  | 4.58836100  | O | 6.61268000  | 1.38818400  | -4.21311000 |
| O | 9.66278800  | -2.04290800  | -5.05644100 | C | 7.08219800  | 3.71349100  | -3.74162800 |
| C | 9.53982300  | 0.36160900   | -5.05204100 | N | 2.09648900  | -5.86915600 | 2.57151600  |
| N | 6.75524700  | -6.62566900  | 4.22708100  | C | 4.92695300  | 2.52253900  | 0.50786600  |
| N | 10.54056600 | 1.09061700   | -5.80594600 | H | 5.64621100  | 1.00375100  | 1.85282400  |
| H | 9.25459300  | 0.98188700   | -4.20054800 | C | 4.38018000  | 1.79176400  | -1.72780300 |
| H | 8.65646700  | 0.18519200   | -5.66914600 | H | 4.64679400  | -0.29373200 | -2.10537400 |
| C | 5.82435100  | -5.95765900  | 4.97000300  | C | 1.69434600  | -2.73691400 | 0.40122900  |
| H | 6.51688600  | -7.58828400  | 4.00197400  | N | 8.37791100  | 4.22732400  | -4.16153400 |
| C | 11.40287500 | 1.90699100   | -5.16733600 | H | 6.74262300  | 4.23994000  | -2.84301500 |
| H | 10.72715900 | 0.83200100   | -6.77947400 | H | 6.35423000  | 3.88549700  | -4.53447000 |
| O | 5.97762300  | -4.84804700  | 5.45501600  | C | 1.35126900  | -5.74628200 | 3.70489600  |
| C | 4.53076800  | -6.75242600  | 5.17233300  | H | 1.63119700  | -6.31031500 | 1.77907600  |
| O | 11.39784100 | 2.15063100   | -3.96836300 | C | 4.40957200  | 2.80272200  | -0.75987500 |
| O | 12.29066600 | 2.43850200   | -6.03834200 | H | 4.98296000  | 3.31827700  | 1.24658500  |
| N | 4.64859100  | -7.70629400  | 6.25766200  | H | 4.02660700  | 2.00476600  | -2.72756100 |
| H | 4.25356700  | -7.27443500  | 4.24894600  | C | 1.57631300  | -3.75996300 | -0.54272800 |
| H | 3.74115300  | -6.03853900  | 5.41441900  | C | 0.75422500  | -2.68448100 | 1.43660100  |
| C | 13.13699600 | 3.44891100   | -5.49862600 | H | 3.01776400  | 0.46281600  | 0.59415800  |
| C | 5.24839400  | -8.89583600  | 6.05824000  | C | 9.33870100  | 4.53500900  | -3.26933400 |
| H | 4.16223700  | -7.49483000  | 7.12787000  | H | 8.52110300  | 4.41625200  | -5.15346300 |
| O | 5.74969800  | -9.26525400  | 5.00641200  | O | 1.72832700  | -5.20465900 | 4.73628100  |
| O | 5.22356600  | -9.65334800  | 7.17617200  | C | -0.02489900 | -6.40374500 | 3.60879400  |
| C | 5.81212100  | -10.94227100 | 7.03049400  | N | 3.86767200  | 4.08642000  | -1.00384400 |
| H | 11.25380900 | -2.68807800  | 0.04141500  | C | 0.49126900  | -4.62712500 | -0.51285300 |
| C | 9.03224900  | -1.75604700  | -0.64922000 | H | 2.30903200  | -3.83686500 | -1.34191200 |
| C | 9.63307800  | -0.54814600  | -0.28120500 | C | -0.33768600 | -3.54153100 | 1.48328000  |
| C | 8.14619200  | -1.74586700  | -1.73137600 | H | 0.84695100  | -1.90454600 | 2.18796300  |

|   |             |              |             |   |             |             |             |
|---|-------------|--------------|-------------|---|-------------|-------------|-------------|
| C | 0.94123700  | 1.72843400   | -0.02779500 | C | -0.30545500 | 6.72744300  | -0.46895700 |
| O | 9.24442100  | 4.39512700   | -2.05669700 | H | -0.49175700 | 5.97228000  | 1.41067100  |
| O | 10.43107800 | 5.05685600   | -3.86943000 | C | -4.74912700 | -2.82968600 | -0.91717800 |
| N | 0.06660900  | -7.84359200  | 3.48315700  | H | -4.21969400 | -2.64743100 | -2.99197900 |
| H | -0.57981000 | -5.99903700  | 2.75782600  | H | -4.96698100 | -2.92470900 | 1.22429700  |
| H | -0.56824000 | -6.15832400  | 4.52354700  | C | -2.59606100 | 3.15945500  | 2.48301900  |
| C | 3.76324000  | 4.69086400   | -2.22171200 | C | -3.62652800 | 3.95588400  | 0.46844200  |
| H | 3.41762000  | 4.55638900   | -0.22031700 | H | -3.99086300 | 0.39441400  | -0.98873500 |
| C | -0.50479300 | -4.48550000  | 0.46202700  | C | 4.18137100  | 8.43130600  | 1.80446100  |
| H | 0.37544000  | -5.39346700  | -1.27565000 | C | -2.46969200 | -8.10247300 | -0.67841800 |
| H | -1.08741300 | -3.45129500  | 2.25856300  | H | -3.21443100 | -8.48598600 | 1.19856800  |
| C | 1.34007600  | 2.47052300   | 1.09023900  | O | -0.03193400 | 6.59270300  | -1.65508400 |
| C | 0.28549900  | 2.39905700   | -1.06594000 | C | -0.73331200 | 8.06826300  | 0.11649600  |
| H | 0.10647600  | -1.50024000  | -0.96588600 | N | -5.98318400 | -3.44810700 | -1.22222600 |
| C | 11.52463700 | 5.28343800   | -2.97965400 | C | -2.78812600 | 4.40613800  | 3.06737400  |
| C | 0.19404700  | -8.43627200  | 2.27977300  | H | -2.13752300 | 2.35833800  | 3.05716200  |
| H | 0.16389500  | -8.40333100  | 4.33534900  | C | -3.81432800 | 5.20893200  | 1.03301800  |
| O | 4.19478900  | 4.21920000   | -3.26482300 | H | -3.97877400 | 3.76991500  | -0.54298100 |
| C | 3.08697200  | 6.05853500   | -2.18075100 | C | -6.51295600 | 0.47978200  | -0.44536300 |
| N | -1.64892100 | -5.28096000  | 0.31450700  | O | -2.24375800 | -7.32940600 | -1.60030900 |
| C | 0.99175700  | 3.81027700   | 1.21487100  | O | -2.07559800 | -9.39689200 | -0.69792700 |
| H | 1.85868000  | 1.96972200   | 1.90354100  | N | 0.21243400  | 8.57258400  | 1.09171000  |
| C | -0.06211200 | 3.73826000   | -0.95803400 | H | -1.71686500 | 7.96440000  | 0.58783600  |
| H | -0.02355600 | 1.83663000   | -1.94260900 | H | -0.80864400 | 8.77846600  | -0.71058400 |
| C | -2.43628300 | -1.32108600  | -0.41125500 | C | -6.64087900 | -4.34575100 | -0.43563500 |
| O | 0.20377200  | -7.86694400  | 1.19721200  | H | -6.46543600 | -3.13803900 | -2.06394900 |
| O | 0.31910700  | -9.77643700  | 2.42476000  | C | -3.42807600 | 5.42652300  | 2.35922700  |
| N | 3.83592100  | 7.01791600   | -1.39730900 | H | -2.47301500 | 4.59157900  | 4.09124700  |
| H | 2.07476600  | 5.97042700   | -1.77102600 | H | -4.29147100 | 6.00597400  | 0.47748800  |
| H | 3.01277300  | 6.41082100   | -3.21262000 | C | -6.58993500 | 0.55005900  | -1.83934900 |
| C | -2.65858500 | -5.49738000  | 1.20211500  | C | -7.49780300 | -0.24320200 | 0.23562200  |
| H | -1.72227800 | -5.78697200  | -0.56652600 | C | -1.21574700 | -9.72171000 | -1.78799600 |
| C | 0.24284100  | 4.43499500   | 0.21468500  | C | 0.12832500  | 8.22339400  | 2.39033200  |
| H | 1.25810800  | 4.37521300   | 2.10419500  | H | 1.10902100  | 8.90785800  | 0.74388000  |
| H | -0.61284300 | 4.23687300   | -1.74564300 | O | -6.21886000 | -4.77157500 | 0.63067400  |
| C | -2.77423200 | -1.68149600  | -1.71746700 | C | -7.96418100 | -4.82617000 | -1.02701900 |
| C | -3.22092200 | -1.81560500  | 0.63608800  | N | -3.72940200 | 6.61802300  | 3.04151400  |
| H | -0.99038500 | 1.40572500   | 1.16336400  | C | -7.64157400 | -0.04189100 | -2.52401300 |
| C | 0.41191200  | -10.51161900 | 1.20761800  | H | -5.83804100 | 1.11389500  | -2.38556500 |
| C | 3.57225800  | 7.21551200   | -0.08928200 | C | -8.55266900 | -0.84919300 | -0.43490700 |
| H | 4.67970300  | 7.41730300   | -1.80744500 | H | -7.45113500 | -0.30205800 | 1.31991400  |
| O | -2.72860600 | -5.00954100  | 2.32070700  | O | -0.76560100 | 7.55848100  | 2.89586700  |
| C | -3.70707300 | -6.48240800  | 0.67023600  | O | 1.17398700  | 8.71653200  | 3.09127700  |
| N | -0.25249700 | 5.73095700   | 0.45139500  | N | -7.78448600 | -5.52088300 | -2.28532400 |
| C | -3.92909100 | -2.41660000  | -1.97037900 | H | -8.64014000 | -3.97743200 | -1.17716800 |
| H | -2.17238700 | -1.31572500  | -2.54527800 | H | -8.41604100 | -5.50568900 | -0.30081200 |
| C | -4.35991100 | -2.57132000  | 0.40166500  | C | -3.79680000 | 7.86349700  | 2.50706500  |
| H | -2.96418900 | -1.54955800  | 1.65796000  | H | -3.82324100 | 6.55456700  | 4.05291600  |
| C | -3.04770700 | 2.90232900   | 1.18626600  | C | -8.64118900 | -0.72381700 | -1.82589700 |
| O | 2.67393200  | 6.67707200   | 0.54169000  | H | -7.71897100 | 0.04564200  | -3.60508600 |
| O | 4.45739400  | 8.07912900   | 0.45393400  | H | -9.32163900 | -1.38831700 | 0.10343700  |
| N | -3.15792100 | -7.80864400  | 0.43761700  | C | 1.11486100  | 8.47432100  | 4.49179300  |
| H | -4.13501300 | -6.09392200  | -0.26025300 | C | -7.79408000 | -4.85561700 | -3.45740200 |
| H | -4.50533400 | -6.55188900  | 1.41004300  | H | -7.46990800 | -6.49117600 | -2.26110000 |

|   |              |             |             |   |              |              |             |
|---|--------------|-------------|-------------|---|--------------|--------------|-------------|
| O | -3.70285200  | 8.12668100  | 1.31471000  | N | -5.41417300  | 8.01525000   | 8.25237500  |
| C | -4.01164000  | 8.95095700  | 3.55555600  | H | -7.47469800  | 7.82941400   | 8.15055400  |
| N | -9.73667400  | -1.19199200 | -2.56800400 | H | -6.81256500  | 9.35180500   | 7.51096400  |
| O | -8.00993000  | -3.65827300 | -3.58976900 | C | -12.76384600 | 0.95856300   | -4.74667800 |
| O | -7.50372100  | -5.68368200 | -4.48399000 | H | -11.52570300 | 2.47012100   | -5.24148600 |
| N | -2.90630000  | 9.05567500  | 4.48722500  | C | -5.14935900  | 6.78863100   | 8.74463200  |
| H | -4.93171000  | 8.74157100  | 4.11207000  | H | -4.62883900  | 8.63383600   | 8.05519300  |
| H | -4.12171900  | 9.90021100  | 3.02613500  | O | -13.22422500 | 0.14394100   | -3.95761700 |
| C | -10.54112200 | -2.24387000 | -2.28010400 | C | -13.25699400 | 1.01883900   | -6.19944100 |
| H | -9.88550200  | -0.75245300 | -3.47438000 | O | -5.92313700  | 5.83981600   | 8.74931500  |
| C | -7.57549900  | -5.07803600 | -5.76953400 | O | -3.91645900  | 6.73100100   | 9.28571900  |
| C | -2.82024500  | 8.24062600  | 5.55665400  | N | -12.27030200 | 0.64705400   | -7.19111300 |
| H | -2.04101000  | 9.46507100  | 4.13904300  | H | -13.60338300 | 2.03318500   | -6.42311800 |
| O | -10.51094600 | -2.89717600 | -1.24382800 | H | -14.10063800 | 0.33114400   | -6.27447900 |
| C | -11.52024000 | -2.55803400 | -3.40901400 | C | -3.54226500  | 5.44356600   | 9.76515400  |
| O | -3.67505500  | 7.44206000  | 5.91951600  | C | -11.30415700 | 1.51694800   | -7.54661100 |
| O | -1.64896400  | 8.41770300  | 6.20368200  | H | -12.10991600 | -0.34638600  | -7.35142700 |
| N | -10.85263900 | -2.98314800 | -4.62451700 | O | -11.21068300 | 2.67427700   | -7.15817500 |
| H | -12.12233000 | -1.66839500 | -3.62299900 | O | -10.44966600 | 0.96915400   | -8.43296300 |
| H | -12.17417900 | -3.36255000 | -3.06513600 | C | -9.37036900  | 1.81659800   | -8.81414900 |
| C | -1.49356700  | 7.63609900  | 7.38202200  | H | 14.77039400  | -5.88408600  | 0.80710900  |
| C | -10.33313300 | -2.08677800 | -5.48664900 | H | -9.45900700  | 2.69065200   | 1.29628000  |
| H | -10.46475800 | -3.92536900 | -4.63329100 | H | 13.58861300  | 3.11508700   | -4.56238600 |
| O | -10.45193500 | -0.86933000 | -5.41203600 | H | 12.55704300  | 4.35887900   | -5.32047900 |
| O | -9.65710000  | -2.70408300 | -6.47674800 | H | 13.90163700  | 3.62900000   | -6.25345700 |
| C | -9.12267100  | -1.83233500 | -7.46608500 | H | 12.25887600  | 5.85075200   | -3.55205400 |
| H | -5.07381000  | 1.89455800  | 2.33974900  | H | 11.93965400  | 4.32423800   | -2.66109400 |
| C | -6.86577200  | 3.76786100  | 2.73768800  | H | 11.19744900  | 5.85506000   | -2.11000100 |
| C | -6.52513200  | 3.33076200  | 4.02469600  | H | 5.02906500   | 9.03600300   | 2.12838900  |
| C | -7.18629400  | 5.12107700  | 2.57370700  | H | 4.08553100   | 7.53834200   | 2.42659100  |
| H | -7.09225100  | 3.14735200  | -0.58430400 | H | 3.25087400   | 9.00187900   | 1.86942800  |
| C | -6.48246800  | 4.21399300  | 5.09027700  | H | 2.07485900   | 8.80844000   | 4.88743300  |
| H | -6.29963500  | 2.28135500  | 4.19105800  | H | 0.96283000   | 7.41185300   | 4.69477600  |
| C | -7.13716000  | 6.02422400  | 3.63116100  | H | 0.29343000   | 9.03667300   | 4.94404100  |
| H | -7.46011500  | 5.47896500  | 1.58509200  | H | -0.46402400  | 7.79602500   | 7.70523400  |
| C | -9.73054100  | 2.70757900  | -0.87564300 | H | -1.66948700  | 6.57896300   | 7.16948200  |
| C | -6.77872000  | 5.57068300  | 4.90515600  | H | -2.19598800  | 7.96042200   | 8.15346500  |
| H | -6.22034000  | 3.86031000  | 6.08486300  | H | -3.54758700  | 4.71496000   | 8.95074600  |
| H | -7.37237600  | 7.06916400  | 3.47850200  | H | -4.22821200  | 5.10911300   | 10.54591500 |
| C | -9.34810000  | 3.26033400  | -2.10495300 | H | -2.53553400  | 5.56096100   | 10.16586800 |
| C | -10.85453900 | 1.87362400  | -0.86074300 | H | 5.71355200   | -11.42040400 | 8.00423100  |
| N | -6.74849100  | 6.38610600  | 6.05064500  | H | 6.86391200   | -10.85476400 | 6.74989100  |
| C | -10.04627600 | 2.96822700  | -3.26522300 | H | 5.28688600   | -11.51962600 | 6.26549100  |
| H | -8.49536700  | 3.93176400  | -2.15090000 | H | 0.65508200   | -11.53331200 | 1.49908900  |
| C | -11.56561700 | 1.56632500  | -2.01558900 | H | -0.54295800  | -10.47678800 | 0.67935900  |
| H | -11.16739500 | 1.42863100  | 0.08079600  | H | 1.19689700   | -10.09894600 | 0.56956000  |
| C | -6.72716000  | 7.74169800  | 6.12495200  | H | -1.02777700  | -10.79263900 | -1.70688700 |
| H | -6.62667900  | 5.90221300  | 6.93953100  | H | -0.28132800  | -9.16038400  | -1.70613600 |
| C | -11.15819500 | 2.11553000  | -3.23588600 | H | -1.69680600  | -9.48912600  | -2.73941500 |
| H | -9.73852900  | 3.40487600  | -4.21268500 | H | -7.18653100  | -5.82135400  | -6.46609200 |
| H | -12.42412900 | 0.90952500  | -1.98124100 | H | -6.97388700  | -4.16683500  | -5.80218300 |
| O | -6.79207400  | 8.50606200  | 5.17076400  | H | -8.60949700  | -4.82090500  | -6.01530400 |
| C | -6.66231400  | 8.27253200  | 7.56509700  | H | -8.52005800  | -2.46533200  | -8.11867100 |
| N | -11.83429200 | 1.90478800  | -4.45134600 | H | -8.50406500  | -1.05856300  | -7.00494800 |



|   |             |             |             |   |             |              |             |
|---|-------------|-------------|-------------|---|-------------|--------------|-------------|
| H | -9.92651500 | -1.35072300 | -8.02775500 | H | 4.82448600  | 9.69554200   | -1.61529500 |
| H | -8.77039700 | 1.23138400  | -9.51068200 | H | 4.53836400  | 11.30940100  | -2.29160200 |
| H | -8.77721400 | 2.09838900  | -7.94114200 | O | -1.00564900 | 10.72943900  | 3.09268300  |
| H | -9.74419200 | 2.72169200  | -9.29704100 | C | -1.62140200 | 11.03064400  | 1.83786300  |
| O | 11.11622600 | -0.11493900 | -8.31863300 | C | 0.04947500  | 11.66083700  | 3.27396300  |
| C | 10.35925800 | -1.33597700 | -8.21389600 | C | -0.51620700 | 11.63452000  | 0.94207900  |
| C | 12.49867400 | -0.39673000 | -8.08232900 | H | -2.42765400 | 11.76028100  | 2.00239200  |
| C | 11.33787400 | -2.43100000 | -7.77264000 | H | -2.06115100 | 10.10458800  | 1.45609800  |
| H | 9.88795800  | -1.54202200 | -9.17924900 | C | 0.68795400  | 11.78753100  | 1.89242000  |
| H | 9.57724300  | -1.18990800 | -7.46153300 | H | 0.72109700  | 11.26380300  | 4.03925900  |
| C | 12.49546900 | -1.62284100 | -7.17857800 | H | -0.35871300 | 12.62436700  | 3.61825000  |
| H | 12.94362300 | 0.49606300  | -7.63330400 | H | -0.26618500 | 10.98137200  | 0.10279600  |
| H | 12.99993300 | -0.60554900 | -9.03769300 | H | -0.83566800 | 12.59956100  | 0.53963200  |
| H | 10.88107700 | -3.10717800 | -7.04839600 | H | 1.39415100  | 10.96650900  | 1.74219700  |
| H | 11.68517900 | -3.00910600 | -8.63482200 | H | 1.21755900  | 12.73469700  | 1.76134700  |
| H | 12.26862200 | -1.32922900 | -6.14730400 | O | -3.69269700 | 10.20274600  | 7.34558400  |
| H | 13.44591400 | -2.16091900 | -7.18411200 | C | -4.51491300 | 10.94068300  | 6.43955500  |
| O | 8.34917100  | 4.25399100  | -7.01496200 | C | -2.59295800 | 11.03431200  | 7.68023000  |
| C | 7.87306100  | 2.90734800  | -7.07453300 | C | -3.57124400 | 11.88899900  | 5.66577800  |
| C | 9.73871600  | 4.19843700  | -7.33072600 | H | -5.25470700 | 11.51584700  | 7.01524700  |
| C | 8.60821100  | 2.26262400  | -8.25607800 | H | -5.04627100 | 10.21745700  | 5.81410500  |
| H | 6.78791500  | 2.94596500  | -7.18429700 | C | -2.20874300 | 11.70286200  | 6.36259900  |
| H | 8.10623900  | 2.39236300  | -6.13285200 | H | -1.80982100 | 10.40171200  | 8.10424700  |
| C | 9.87929900  | 3.12656000  | -8.42047600 | H | -2.90041700 | 11.77854400  | 8.43148500  |
| H | 10.30878700 | 3.92365000  | -6.43131100 | H | -3.50476500 | 11.62583600  | 4.60774600  |
| H | 10.04273200 | 5.19973200  | -7.64377400 | H | -3.92206200 | 12.92188000  | 5.73928800  |
| H | 8.84461000  | 1.21330800  | -8.05968900 | H | -1.57776900 | 11.02505200  | 5.78162300  |
| H | 7.99566200  | 2.29959900  | -9.15950200 | H | -1.67271200 | 12.64380800  | 6.51083900  |
| H | 10.79718800 | 2.54648900  | -8.29729500 | O | 3.11399400  | -6.56223500  | 8.38423500  |
| H | 9.90409400  | 3.58687000  | -9.41139900 | C | 2.54583100  | -5.31203700  | 7.97686800  |
| O | 5.97148500  | 7.79793600  | -3.18266200 | C | 4.16717200  | -6.23371400  | 9.28634900  |
| C | 5.65370400  | 7.15024800  | -4.41871500 | C | 3.72075200  | -4.31905200  | 7.88986300  |
| C | 7.33257900  | 7.48001100  | -2.91446300 | H | 1.81759900  | -4.99779600  | 8.73769600  |
| C | 6.93927200  | 7.20314900  | -5.27116400 | H | 2.02732800  | -5.46676500  | 7.02793500  |
| H | 4.81338400  | 7.69140800  | -4.86220300 | C | 4.86639900  | -5.03535700  | 8.64115200  |
| H | 5.34164100  | 6.11608300  | -4.21948800 | H | 4.79844600  | -7.12071800  | 9.39584900  |
| C | 8.02846700  | 7.64203200  | -4.26671800 | H | 3.74103700  | -5.97603900  | 10.26727700 |
| H | 7.41854400  | 6.44707900  | -2.54331100 | H | 4.01491900  | -4.12599700  | 6.85517600  |
| H | 7.68733600  | 8.16308300  | -2.13951500 | H | 3.45658800  | -3.36511800  | 8.35267400  |
| H | 7.15813700  | 6.22873500  | -5.71579500 | H | 5.61842400  | -5.37269700  | 7.92259300  |
| H | 6.84708800  | 7.92263700  | -6.08774900 | H | 5.36017700  | -4.39832900  | 9.37846800  |
| H | 8.94204300  | 7.04737800  | -4.34136800 | O | 0.31197100  | -9.13482600  | 6.00120200  |
| H | 8.28765100  | 8.69308400  | -4.42119700 | C | 1.20323500  | -8.40956600  | 6.86684700  |
| O | 2.25384800  | 9.72258300  | -0.56631800 | C | 0.76217500  | -10.49152400 | 5.85855900  |
| C | 1.80225200  | 9.50683800  | -1.90601900 | C | 2.00243500  | -9.48066600  | 7.59574400  |
| C | 3.22616400  | 10.75462500 | -0.62615000 | H | 0.60457300  | -7.77555800  | 7.52587700  |
| C | 3.01103900  | 9.80139600  | -2.81937000 | H | 1.85432000  | -7.76474700  | 6.25707300  |
| H | 0.97674900  | 10.20261900 | -2.11919400 | C | 2.14619100  | -10.53831800 | 6.50034200  |
| H | 1.42250500  | 8.48309900  | -1.96910200 | H | 0.75687800  | -10.74496500 | 4.79412500  |
| C | 4.05323400  | 10.42680200 | -1.86826300 | H | 0.05718700  | -11.14862800 | 6.38386500  |
| H | 3.79523600  | 10.73730000 | 0.30644700  | H | 2.95300000  | -9.11700300  | 7.98170900  |
| H | 2.72436200  | 11.73094600 | -0.72287100 | H | 1.41585600  | -9.88008800  | 8.43128500  |
| H | 3.40235800  | 8.88907700  | -3.27544300 | H | 2.91206100  | -10.23301500 | 5.77664800  |
| H | 2.73020100  | 10.48723800 | -3.62274600 | H | 2.40134200  | -11.53212100 | 6.87912900  |

|   |              |              |             |
|---|--------------|--------------|-------------|
| O | -3.79373900  | -8.97785200  | 2.90453200  |
| C | -3.35374000  | -7.95107600  | 3.81510900  |
| C | -3.56282700  | -10.27004100 | 3.46552400  |
| C | -2.86998600  | -8.67655300  | 5.07184900  |
| H | -4.18452300  | -7.26388500  | 3.99918500  |
| H | -2.54903600  | -7.38894400  | 3.32911400  |
| C | -2.49112800  | -10.05689900 | 4.52957500  |
| H | -3.25795500  | -10.94044300 | 2.65497200  |
| H | -4.49645000  | -10.65029200 | 3.90465000  |
| H | -2.02650400  | -8.17501800  | 5.55257400  |
| H | -3.68283400  | -8.76497800  | 5.80120800  |
| H | -1.50331900  | -10.02255500 | 4.05809500  |
| H | -2.49051700  | -10.83740200 | 5.29508900  |
| O | -7.03903400  | -8.18531100  | -1.51347400 |
| C | -7.05945600  | -8.10462000  | -0.08523700 |
| C | -5.75990500  | -8.71030100  | -1.85253900 |
| C | -6.25260100  | -9.31730900  | 0.42223300  |
| H | -8.10747600  | -8.11275900  | 0.22473400  |
| H | -6.60468300  | -7.15788200  | 0.23587800  |
| C | -5.54030000  | -9.84027800  | -0.84571400 |
| H | -4.99072400  | -7.92929700  | -1.75110200 |
| H | -5.79998200  | -9.03375000  | -2.89469200 |
| H | -5.54265000  | -9.01609500  | 1.19650800  |
| H | -6.90680200  | -10.08160400 | 0.84805900  |
| H | -4.48103300  | -10.05153300 | -0.68300600 |
| H | -6.02445200  | -10.75122000 | -1.20847100 |
| O | -10.42129900 | -5.77096300  | -4.11547600 |
| C | -10.92157500 | -6.00716000  | -2.79578900 |
| C | -10.31248300 | -7.03811000  | -4.74670300 |
| C | -10.39734300 | -7.39718300  | -2.37579500 |
| H | -12.02125100 | -6.00003800  | -2.82660800 |
| H | -10.58581100 | -5.18201100  | -2.16100200 |
| C | -9.75559200  | -7.95703400  | -3.66158200 |
| H | -9.65756100  | -6.92636300  | -5.61447600 |
| H | -11.30635900 | -7.37107200  | -5.08624000 |
| H | -9.66038600  | -7.32931200  | -1.57209700 |
| H | -11.21901200 | -8.02831400  | -2.02715800 |
| H | -8.66881000  | -7.85611000  | -3.61805900 |
| H | -9.99973800  | -9.00763300  | -3.83608400 |
| O | -12.45593900 | -2.27713500  | -7.28293100 |
| C | -13.48198500 | -2.60427100  | -6.34497900 |
| C | -12.25619700 | -3.42283700  | -8.09569100 |
| C | -13.38149100 | -4.12664500  | -6.09857600 |
| H | -14.45933200 | -2.34605500  | -6.77844400 |
| H | -13.32173500 | -1.98726300  | -5.45584000 |
| C | -12.32857100 | -4.59736600  | -7.12203300 |
| H | -11.28996900 | -3.31644300  | -8.59428700 |
| H | -13.04963900 | -3.48602500  | -8.85663800 |
| H | -13.06330800 | -4.35539400  | -5.07923100 |
| H | -14.34897100 | -4.60637900  | -6.26906800 |
| H | -11.35829000 | -4.72649000  | -6.63539700 |
| H | -12.60190900 | -5.53360900  | -7.61510100 |

### 1b-8-mer<sub>RH</sub>-1b-8-mer<sub>LH</sub>

|   |             |             |             |
|---|-------------|-------------|-------------|
| C | 13.53795100 | 1.46286200  | -1.91203400 |
| C | 12.24961400 | 1.14658200  | -1.71055300 |
| C | 11.87141600 | 0.21686400  | -0.62760300 |
| C | 10.66411000 | 0.08976100  | -0.02182300 |
| C | 9.53193900  | 0.98300800  | -0.32756700 |
| C | 8.21274600  | 0.67249400  | -0.36325600 |
| C | 7.71340400  | -0.67861400 | -0.05959600 |
| C | 6.55563500  | -0.98794100 | 0.57073100  |
| C | 5.60043400  | 0.06675300  | 0.95878400  |
| C | 4.26279500  | 0.01817400  | 0.75959600  |
| C | 3.65268700  | -1.21341400 | 0.23335900  |
| C | 2.50587800  | -1.79133700 | 0.65298600  |
| H | 13.83474000 | 2.12492200  | -2.71951900 |
| C | 11.17559200 | 1.72120900  | -2.57206400 |
| C | 10.94385500 | 3.09795300  | -2.62051300 |
| C | 10.27820000 | 0.87936800  | -3.23287200 |
| H | 12.67810900 | -0.42082800 | -0.26745100 |
| C | 9.80628900  | 3.60414300  | -3.23875300 |
| H | 11.62693100 | 3.77093800  | -2.10879100 |
| C | 9.14904600  | 1.36895600  | -3.87409500 |
| H | 10.43797000 | -0.19496300 | -3.19270500 |
| C | 10.43515700 | -0.97658500 | 0.99144000  |
| C | 8.88424600  | 2.74362300  | -3.84307500 |
| H | 9.61238000  | 4.67402500  | -3.23175300 |
| H | 8.45290200  | 0.69909900  | -4.35808300 |
| C | 10.73737700 | -2.31549700 | 0.72394900  |
| C | 9.75957600  | -0.68434800 | 2.18080900  |
| H | 9.79247800  | 1.99263200  | -0.62235400 |
| N | 7.70296000  | 3.30748800  | -4.36686300 |
| C | 10.31993500 | -3.32442000 | 1.58336000  |
| H | 11.24695600 | -2.57179000 | -0.20118100 |
| C | 9.34959700  | -1.67670600 | 3.05824200  |
| H | 9.50283100  | 0.34899300  | 2.39831200  |
| C | 7.25815200  | 1.73928100  | -0.76988300 |
| C | 6.81272300  | 2.70558500  | -5.21244600 |
| H | 7.42150700  | 4.20369300  | -3.97837400 |
| C | 9.59983900  | -3.01848800 | 2.74328400  |
| H | 10.52782700 | -4.36441800 | 1.34336300  |
| H | 8.81155200  | -1.42938000 | 3.96169700  |
| C | 7.38726000  | 3.04471600  | -0.28515200 |
| C | 6.18665000  | 1.46421900  | -1.62949000 |
| H | 8.38922500  | -1.49984000 | -0.27581500 |
| O | 6.91862400  | 1.57936000  | -5.65932600 |
| C | 5.61276200  | 3.58085600  | -5.58387100 |
| N | 9.13526100  | -4.08872900 | 3.53079800  |
| C | 6.46746400  | 4.02503200  | -0.62442300 |
| H | 8.19828500  | 3.28346000  | 0.39815900  |
| C | 5.25157500  | 2.43266900  | -1.97569000 |
| H | 6.06512800  | 0.45400300  | -2.01273900 |
| C | 6.27047500  | -2.41145200 | 0.89190300  |
| N | 5.97263700  | 4.88655200  | -6.11139000 |
| H | 4.96463000  | 3.71670100  | -4.71144400 |
| H | 5.05182600  | 3.03513100  | -6.34300200 |

|   |             |             |             |   |             |              |             |
|---|-------------|-------------|-------------|---|-------------|--------------|-------------|
| C | 8.64764200  | -4.02358100 | 4.80797900  | C | 10.60907500 | -9.01244000  | 3.37051300  |
| H | 9.06933600  | -4.99287600 | 3.07100700  | C | 3.64973300  | 8.32418700   | -1.84128100 |
| C | 5.38243400  | 3.72699600  | -1.45689800 | H | 4.87064300  | 7.20801500   | -3.04632600 |
| H | 6.57274500  | 5.02880900  | -0.21775700 | O | 5.52492300  | -6.53863800  | 4.06040200  |
| H | 4.41075700  | 2.19051200  | -2.61292300 | C | 5.58142200  | -8.61765600  | 2.84839200  |
| C | 6.47936000  | -3.42563900 | -0.04888400 | N | 1.55408600  | 5.01252300   | 1.22511700  |
| C | 5.77586200  | -2.77266300 | 2.14947600  | C | 2.39374500  | -4.94554400  | -1.44378700 |
| H | 6.02675200  | 1.01247900  | 1.28006700  | H | 2.52036900  | -2.84753300  | -1.88475300 |
| C | 6.12431500  | 5.97079900  | -5.33298200 | C | 2.09171600  | -5.53080700  | 0.88233300  |
| H | 6.15617000  | 4.99604300  | -7.09847600 | H | 1.97151200  | -3.87461500  | 2.23692700  |
| O | 8.53430500  | -3.00649500 | 5.46534800  | O | 2.55902800  | 8.55388000   | -1.34342800 |
| C | 8.23154500  | -5.38115500 | 5.37788600  | O | 4.73753700  | 9.09911200   | -1.65527300 |
| N | 4.48093300  | 4.77123800  | -1.72576000 | N | 6.80964900  | -9.01709500  | 2.17598400  |
| C | 6.20470200  | -4.74991200 | 0.25882000  | H | 4.72938000  | -8.99605000  | 2.27695700  |
| H | 6.83223400  | -3.16545500 | -1.04326600 | H | 5.56898700  | -9.03082800  | 3.85765800  |
| C | 5.50768800  | -4.09651900 | 2.47731700  | C | 0.90049800  | 5.74458900   | 0.28125700  |
| H | 5.58862700  | -1.99508000 | 2.88534500  | H | 1.62851800  | 5.44127100   | 2.14533000  |
| C | 3.47594200  | 1.26354300  | 0.93960900  | C | 2.26889800  | -5.91996900  | -0.44894600 |
| O | 6.02802300  | 5.96848700  | -4.10985400 | H | 2.50471500  | -5.25409200  | -2.48079800 |
| O | 6.40032100  | 7.06626900  | -6.05681400 | H | 1.98775300  | -6.28074900  | 1.65423100  |
| N | 9.27694500  | -6.39025100 | 5.31848300  | C | 4.54111300  | 10.19946200  | -0.76437300 |
| H | 7.35510300  | -5.75503400 | 4.83695800  | C | 6.83409600  | -9.14922700  | 0.83376100  |
| H | 7.95649400  | -5.21518100 | 6.41957800  | H | 7.68048300  | -8.69056300  | 2.59115900  |
| C | 3.54137700  | 4.83654100  | -2.70822400 | O | 0.70512000  | 5.39159100   | -0.87156200 |
| H | 4.73392900  | 5.66208900  | -1.32190300 | C | 0.40689000  | 7.10242100   | 0.79724600  |
| C | 5.72111300  | -5.09833200 | 1.52333700  | N | 2.32437500  | -7.27164800  | -0.85009000 |
| H | 6.35930500  | -5.52794900 | -0.48531300 | O | 5.85131700  | -9.11281100  | 0.10111900  |
| H | 5.12271700  | -4.35934400 | 3.45351700  | O | 8.08495900  | -9.34158000  | 0.37860400  |
| C | 3.69457800  | 2.12729100  | 2.01770500  | N | 1.48328300  | 7.98855000   | 1.20168100  |
| C | 2.57265900  | 1.66441000  | -0.05292800 | H | -0.26892800 | 6.96214900   | 1.64832000  |
| H | 4.27225700  | -1.79273800 | -0.44379200 | H | -0.13946800 | 7.57652900   | -0.02047600 |
| C | 6.60194700  | 8.26186700  | -5.30576800 | C | 2.73366500  | -8.32770900  | -0.09256600 |
| C | 9.41214700  | -7.21840700 | 4.26857600  | H | 2.18404100  | -7.46067300  | -1.84101600 |
| H | 9.95262200  | -6.46634400 | 6.06531600  | C | 8.19046800  | -9.48718200  | -1.03558800 |
| O | 3.15064300  | 3.88967600  | -3.36416000 | C | 2.05793700  | 7.88659700   | 2.41640800  |
| C | 2.98822200  | 6.23984100  | -2.96481900 | H | 1.97889000  | 8.48559600   | 0.46067900  |
| N | 5.46744200  | -6.46039700 | 1.76967700  | O | 2.95640800  | -8.28124600  | 1.10733300  |
| C | 3.04894700  | 3.35377600  | 2.08749300  | C | 2.91776500  | -9.61855400  | -0.89685100 |
| H | 4.36934200  | 1.82694200  | 2.81447700  | O | 1.71577800  | 7.11083800   | 3.30406000  |
| C | 1.93639900  | 2.90013200  | -0.01115300 | O | 3.08129600  | 8.75680700   | 2.54961400  |
| H | 2.37841000  | 0.99697000  | -0.88839100 | N | 3.95766100  | -9.52039900  | -1.90178500 |
| C | 2.27166000  | -3.19472700 | 0.22243700  | H | 1.98183000  | -9.88621300  | -1.39660700 |
| O | 8.73441900  | -7.16015000 | 3.24570500  | H | 3.18966200  | -10.40030900 | -0.18750500 |
| O | 10.39229400 | -8.11536100 | 4.45971200  | C | 3.74213500  | 8.70186800   | 3.81437500  |
| N | 3.94063800  | 7.28004500  | -2.63980100 | C | 3.71612400  | -8.94020900  | -3.09787200 |
| H | 2.08564300  | 6.38094100  | -2.36208200 | H | 4.91466500  | -9.55143000  | -1.56534300 |
| H | 2.70715900  | 6.26538400  | -4.02115400 | O | 2.62778600  | -8.53460200  | -3.48011000 |
| C | 5.49801500  | -7.09589300 | 2.97474700  | O | 4.83875300  | -8.86617200  | -3.83761600 |
| H | 5.33962400  | -7.05741700 | 0.95750700  | C | 4.66501000  | -8.25269000  | -5.11342900 |
| C | 2.17645600  | 3.75618000  | 1.07074000  | H | 11.51330200 | -9.56400900  | 3.62293400  |
| H | 3.21928500  | 4.01267000  | 2.93631600  | H | 10.73646500 | -8.46239500  | 2.43585200  |
| H | 1.26744300  | 3.20217700  | -0.80557600 | H | 9.76666200  | -9.70231100  | 3.26688700  |
| C | 2.40201700  | -3.59877700 | -1.10919400 | H | 9.25691600  | -9.55616500  | -1.24487600 |
| C | 2.08473700  | -4.17838800 | 1.19970100  | H | 7.75480600  | -8.62567900  | -1.54707800 |

|   |             |              |             |   |              |             |             |
|---|-------------|--------------|-------------|---|--------------|-------------|-------------|
| H | 7.68096500  | -10.39550500 | -1.36714400 | C | -3.03527700  | 4.31405900  | 0.53746200  |
| H | 5.64814800  | -8.26806100  | -5.58217700 | H | -1.96716200  | 2.77279700  | -0.48959000 |
| H | 4.30975500  | -7.22572900  | -5.00128000 | C | -4.93795800  | 3.62045400  | 1.85356800  |
| H | 3.94535800  | -8.81372800  | -5.71332300 | H | -5.32294900  | 1.51531700  | 1.86433300  |
| H | 6.92725400  | 9.00884000   | -6.02915800 | N | -4.96021100  | -4.35906600 | -3.48553600 |
| H | 5.66914900  | 8.58071800   | -4.83192300 | O | -4.25356400  | 1.85019600  | 5.61275800  |
| H | 7.36557900  | 8.11028100   | -4.53989700 | C | -4.24840400  | 4.25003600  | 5.63450200  |
| H | 5.48108500  | 10.74952800  | -0.76599800 | C | -7.04622300  | 1.92764500  | -0.90952100 |
| H | 4.31774000  | 9.83925300   | 0.24262500  | H | -5.02686700  | 1.82485400  | -1.45608600 |
| H | 3.72300600  | 10.83625900  | -1.11110400 | C | -7.03520800  | -2.06673800 | 0.12753300  |
| H | 4.56560400  | 9.41437100   | 3.74515300  | C | -7.06405100  | -1.40211400 | -2.17481900 |
| H | 4.12027700  | 7.69375700   | 4.01053800  | C | -4.11136400  | 4.64102900  | 1.36973700  |
| H | 3.05407300  | 8.98682400   | 4.61568300  | H | -2.39526400  | 5.10094300  | 0.14237700  |
| H | 14.32392700 | 1.06417700   | -1.27656900 | H | -5.78260500  | 3.86772000  | 2.48224900  |
| C | 1.63386600  | -1.13486800  | 1.63910800  | C | -5.24311000  | -4.18315500 | -4.81125600 |
| C | 0.28214900  | -1.06520400  | 1.60853600  | H | -5.46815900  | -5.10018500 | -3.01043600 |
| H | 2.14058500  | -0.54213900  | 2.39815500  | N | -3.23802600  | 5.13094500  | 6.20057300  |
| C | -0.53308300 | -1.77847300  | 0.60367300  | H | -4.70340800  | 4.74522800  | 4.76913500  |
| C | -0.40095000 | -0.11454600  | 2.53196400  | H | -5.02449000  | 4.08201000  | 6.38129700  |
| C | -1.62770100 | -1.28104000  | -0.02527100 | C | -8.18003700  | 1.19599400  | -0.29483300 |
| H | -0.19370700 | -2.76905000  | 0.31121100  | C | -7.09427100  | 3.38776500  | -1.13620600 |
| C | 0.08162600  | 1.19532700   | 2.64165200  | C | -7.89530500  | -3.11698700 | -0.16723400 |
| C | -1.60872400 | -0.42257500  | 3.16307800  | H | -6.71047500  | -1.90646800 | 1.15258300  |
| C | -2.07946100 | 0.10372100   | 0.20601900  | C | -7.90829500  | -2.45912600 | -2.49050300 |
| C | -2.39332700 | -2.12319500  | -0.98358900 | H | -6.75140300  | -0.71966000 | -2.96120700 |
| C | -0.65747600 | 2.17372500   | 3.28566400  | N | -4.28716500  | 5.99950400  | 1.68642900  |
| H | 1.00809900  | 1.46543900   | 2.14577800  | O | -4.81368100  | -3.28415400 | -5.50957100 |
| C | -2.34853600 | 0.54034700   | 3.84028000  | C | -6.18197300  | -5.24785200 | -5.38766600 |
| H | -2.00948800 | -1.42919000  | 3.07361900  | C | -2.45375600  | 5.92508000  | 5.44957500  |
| C | -3.35804100 | 0.54219700   | 0.28673800  | H | -3.03989900  | 5.09407900  | 7.19077300  |
| H | -1.29579000 | 0.82187500   | 0.42482500  | C | -9.33169100  | 0.93800600  | -0.92362800 |
| C | -2.77536000 | -3.43001600  | -0.66391700 | H | -7.96172300  | 0.66218000  | 0.63027200  |
| C | -2.84967700 | -1.58593700  | -2.19245000 | C | -6.40461300  | 3.99781000  | -2.19037400 |
| C | -1.89097100 | 1.86340400   | 3.86534600  | C | -7.67565500  | 4.21020800  | -0.16412400 |
| H | -0.29557400 | 3.19980100   | 3.30972000  | C | -8.32273100  | -3.33489600 | -1.47918500 |
| H | -3.29168500 | 0.29154900   | 4.30624000  | H | -8.23387000  | -3.78436200 | 0.62237800  |
| C | -4.49215000 | -0.37949600  | 0.07969300  | H | -8.25060500  | -2.61061500 | -3.50490800 |
| C | -3.60674300 | 1.96177400   | 0.65383800  | C | -5.02297600  | 6.53377700  | 2.70015700  |
| C | -3.61234300 | -4.15347500  | -1.50430700 | H | -3.59243800  | 6.61946100  | 1.29390100  |
| H | -2.45188700 | -3.86315200  | 0.27891600  | N | -5.70452900  | -6.61123900 | -5.21115600 |
| C | -3.67156300 | -2.30077800  | -3.05125300 | H | -7.17041300  | -5.15949400 | -4.92381300 |
| H | -2.58216200 | -0.56365500  | -2.44627100 | H | -6.27149800  | -5.04260000 | -6.45443300 |
| N | -2.62402800 | 2.93360400   | 4.41066200  | O | -2.48072300  | 5.96951300  | 4.21936000  |
| C | -5.62878700 | -0.10029700  | -0.59640500 | O | -1.62441200  | 6.65989400  | 6.20216400  |
| H | -4.34239200 | -1.40757400  | 0.39654200  | C | -10.25076000 | -0.12559900 | -0.48804100 |
| C | -2.79015000 | 2.99602500   | 0.18372100  | H | -9.51538800  | 1.38247900  | -1.90173300 |
| C | -4.67249200 | 2.30433400   | 1.49519300  | C | -6.26097000  | 5.37553400  | -2.23923500 |
| C | -4.07794800 | -3.59331000  | -2.69761200 | H | -5.96826500  | 3.38156700  | -2.97146900 |
| H | -3.92329700 | -5.15861700  | -1.22984100 | C | -7.52147900  | 5.59066200  | -0.18637100 |
| H | -4.01765900 | -1.86593600  | -3.97819900 | H | -8.22386900  | 3.75165900  | 0.65457500  |
| C | -3.71732500 | 2.87170800   | 5.22487400  | N | -9.15574000  | -4.44565200 | -1.71732800 |
| H | -2.37435000 | 3.85666200   | 4.06545700  | O | -5.87839200  | 5.94120500  | 3.33292700  |
| C | -5.88500900 | 1.26575900   | -1.09343600 | C | -4.68044700  | 7.98736600  | 3.03013500  |
| C | -6.59495000 | -1.19691300  | -0.87322500 | C | -5.99234200  | -7.33229100 | -4.11478400 |

|   |              |              |             |
|---|--------------|--------------|-------------|
| H | -5.08711900  | -7.02519500  | -5.89470600 |
| C | -0.69496400  | 7.46861400   | 5.47569000  |
| C | -10.44210200 | -0.45991900  | 0.85800000  |
| C | -10.83851400 | -0.94370700  | -1.45794300 |
| C | -6.79313200  | 6.17851400   | -1.22515200 |
| H | -5.71589000  | 5.84269700   | -3.05649400 |
| H | -7.93410400  | 6.20488500   | 0.60238200  |
| C | -9.35442600  | -5.08972300  | -2.90088600 |
| H | -9.59421400  | -4.86985900  | -0.90455900 |
| N | -3.28610100  | 8.29521600   | 2.79020500  |
| H | -5.30163800  | 8.64386500   | 2.41490600  |
| H | -4.94631200  | 8.13052500   | 4.08113700  |
| O | -6.61806300  | -6.90548800  | -3.14789700 |
| O | -5.50437400  | -8.57996100  | -4.18941500 |
| H | -0.01509500  | 7.87129300   | 6.22510500  |
| H | -1.21430700  | 8.28730100   | 4.96876600  |
| H | -0.14403800  | 6.87634300   | 4.74417100  |
| C | -11.14354500 | -1.60222000  | 1.21082200  |
| H | -10.02720000 | 0.17777800   | 1.63354800  |
| C | -11.53589900 | -2.09736600  | -1.12250200 |
| H | -10.70275800 | -0.69829000  | -2.50816900 |
| N | -6.58157800  | 7.56860000   | -1.32469900 |
| O | -9.01522700  | -4.66548600  | -3.99454300 |
| C | -10.00312500 | -6.46645000  | -2.74268800 |
| C | -2.87782300  | 9.32933700   | 2.02724500  |
| H | -2.59516700  | 7.68315600   | 3.21758900  |
| C | -5.73692500  | -9.38661600  | -3.03523800 |
| C | -11.67082900 | -2.44386200  | 0.22469900  |
| H | -11.27613000 | -1.86256400  | 2.25854300  |
| H | -11.94689000 | -2.73938100  | -1.88914200 |
| C | -6.57381900  | 8.47097800   | -0.30498800 |
| H | -6.24299600  | 7.91352300   | -2.22185500 |
| N | -9.17236900  | -7.36294200  | -1.95441100 |
| H | -10.97581600 | -6.36771900  | -2.25320400 |
| H | -10.12991200 | -6.88010400  | -3.74377500 |
| O | -3.60299600  | 10.13794500  | 1.47466300  |
| O | -1.53029400  | 9.34735800   | 1.92620900  |
| H | -5.19635800  | -10.31441200 | -3.21489200 |
| H | -5.36577700  | -8.88948400  | -2.13685100 |
| H | -6.80458000  | -9.58933000  | -2.91651200 |
| N | -12.33213100 | -3.61239300  | 0.65611700  |
| O | -6.86564200  | 8.22462600   | 0.85521200  |
| C | -6.13187400  | 9.87299900   | -0.74153500 |
| C | -9.30721400  | -7.41890200  | -0.61587300 |
| H | -8.24669000  | -7.57386400  | -2.32201700 |
| C | -1.01584000  | 10.36146800  | 1.06159900  |
| C | -12.53226500 | -4.75414800  | -0.06006900 |
| H | -12.59695600 | -3.65039100  | 1.63882200  |
| N | -4.72902400  | 9.92985400   | -1.10007200 |
| H | -6.72821400  | 10.20778200  | -1.59582700 |
| H | -6.29529900  | 10.53964600  | 0.10443800  |
| O | -10.18427600 | -6.85430700  | 0.03091000  |
| O | -8.35770700  | -8.18747800  | -0.05342800 |
| H | 0.06790500   | 10.26117400  | 1.11724100  |

|   |              |             |             |
|---|--------------|-------------|-------------|
| H | -1.36271400  | 10.20284100 | 0.03444400  |
| H | -1.33634900  | 11.35000100 | 1.40106600  |
| O | -12.28833300 | -4.88494200 | -1.24943100 |
| C | -13.09735600 | -5.90682100 | 0.77668900  |
| C | -4.29550800  | 9.52938700  | -2.30956500 |
| H | -4.06113500  | 10.13275800 | -0.36221300 |
| C | -8.43499200  | -8.29048000 | 1.36612600  |
| N | -12.21823200 | -6.32782500 | 1.84955800  |
| H | -14.05682400 | -5.61508500 | 1.21475500  |
| H | -13.24884800 | -6.74554500 | 0.09692600  |
| O | -5.00556500  | 9.12033300  | -3.21753000 |
| O | -2.95378800  | 9.63724000  | -2.40865800 |
| H | -7.55814400  | -8.86197000 | 1.66643600  |
| H | -8.42406800  | -7.30067600 | 1.82832000  |
| H | -9.34682100  | -8.81457300 | 1.66413100  |
| C | -12.17965800 | -5.65284500 | 3.01996800  |
| H | -11.38872900 | -6.84348200 | 1.57284000  |
| C | -2.42199600  | 9.22222500  | -3.66515100 |
| O | -12.90970500 | -4.72025800 | 3.32408100  |
| O | -11.22697800 | -6.14677400 | 3.83367700  |
| H | -1.34116000  | 9.31565100  | -3.57104100 |
| H | -2.70027100  | 8.18811900  | -3.87789700 |
| H | -2.79481000  | 9.86302900  | -4.46729100 |
| C | -11.11874300 | -5.47496900 | 5.08673200  |
| H | -10.31359400 | -5.97799100 | 5.62017000  |
| H | -10.87918200 | -4.41983200 | 4.93664500  |
| H | -12.05492400 | -5.55031000 | 5.64344500  |

### 1b-8-mer<sub>RH</sub>-1b-8-mer<sub>LH</sub>/16CHCl<sub>3</sub>

|   |             |             |             |
|---|-------------|-------------|-------------|
| C | -4.46361100 | 12.76077400 | -1.15648800 |
| C | -4.01322400 | 11.54351700 | -1.49397200 |
| C | -2.57815100 | 11.23474500 | -1.34356700 |
| C | -1.92599200 | 10.05010000 | -1.19882500 |
| C | -2.61162700 | 8.74785400  | -1.17943200 |
| C | -2.28530500 | 7.56153600  | -0.59122400 |
| C | -1.03527300 | 7.31535100  | 0.11655600  |
| C | -0.62842300 | 6.26949100  | 0.88743900  |
| C | -1.52938300 | 5.18746100  | 1.29733500  |
| C | -1.23289500 | 3.87595000  | 1.46795000  |
| C | 0.15862100  | 3.39767800  | 1.38780100  |
| C | 0.77014300  | 2.54939000  | 2.24331500  |
| H | -5.51209300 | 13.02025900 | -1.26438300 |
| C | -4.94626100 | 10.51323100 | -2.03141700 |
| C | -5.91460900 | 9.92224800  | -1.21990400 |
| C | -4.78776400 | 10.04019700 | -3.33833700 |
| H | -1.94968900 | 12.12369600 | -1.29290300 |
| C | -6.64459300 | 8.82701600  | -1.67262700 |
| H | -6.05612800 | 10.28985100 | -0.20708400 |
| C | -5.50979500 | 8.94991800  | -3.80118100 |
| H | -4.04336200 | 10.50089300 | -3.98223000 |
| C | -0.44351200 | 10.11867100 | -1.00953300 |
| C | -6.41348300 | 8.30788300  | -2.94672200 |
| H | -7.37506100 | 8.34548800  | -1.02704200 |
| H | -5.36554900 | 8.57533800  | -4.80637800 |

|   |              |             |             |   |              |             |             |
|---|--------------|-------------|-------------|---|--------------|-------------|-------------|
| C | 0.42942600   | 9.42146200  | -1.85410100 | H | 3.76294700   | 6.53373000  | -0.54957000 |
| C | 0.10732300   | 10.83834100 | 0.05304100  | H | 3.16171200   | 5.91085500  | 3.64959500  |
| H | -3.56908200  | 8.73336500  | -1.68216000 | C | -3.50046000  | 3.18710600  | 2.35658800  |
| N | -7.06120000  | 7.11102900  | -3.32438300 | C | -2.37069200  | 1.76289000  | 0.78302900  |
| C | 1.79778800   | 9.41965600  | -1.61833700 | H | 0.79214200   | 3.88154500  | 0.65151800  |
| H | 0.02435000   | 8.85098400  | -2.68614500 | C | -12.82273700 | 6.03423500  | -4.50185700 |
| C | 1.47618800   | 10.83745400 | 0.30606200  | C | 7.96212300   | 11.78285400 | 1.16473500  |
| H | -0.55614500  | 11.37416500 | 0.72616200  | H | 6.15813100   | 12.70645900 | 0.81114300  |
| C | -3.30841900  | 6.47579900  | -0.71449600 | O | -7.99309600  | 4.80395000  | -1.57746200 |
| C | -7.47659600  | 6.82594800  | -4.58804800 | C | -8.51151700  | 2.53380600  | -1.04083600 |
| H | -7.26314300  | 6.42987200  | -2.59171500 | N | 5.01340000   | 6.25978100  | 1.81093500  |
| C | 2.33051600   | 10.11231200 | -0.52571300 | C | -4.60688000  | 2.34087900  | 2.33281600  |
| H | 2.46620800   | 8.87307500  | -2.27912900 | H | -3.51257100  | 4.06616000  | 2.99432100  |
| H | 1.87793600   | 11.38392200 | 1.14896000  | C | -3.47969100  | 0.92784800  | 0.73636600  |
| C | -4.59750800  | 6.69713900  | -0.22531000 | H | -1.49197900  | 1.52917600  | 0.18794500  |
| C | -3.02014000  | 5.22362600  | -1.27145400 | C | 2.24788800   | 2.42475700  | 2.13020500  |
| H | -0.27903200  | 8.07219200  | -0.02828300 | O | 8.61978800   | 10.74972700 | 1.23685400  |
| O | -7.39607600  | 7.57996600  | -5.54342100 | O | 8.44544300   | 12.99502500 | 1.45945900  |
| C | -8.11263800  | 5.44990800  | -4.76560300 | N | -9.74119300  | 2.82191900  | -1.73814700 |
| N | 3.72680900   | 10.02837200 | -0.29645900 | H | -8.69452200  | 2.41388300  | 0.03755000  |
| C | -5.57454600  | 5.71141600  | -0.28544800 | H | -8.05168000  | 1.60622100  | -1.39812200 |
| H | -4.82752900  | 7.65458400  | 0.23179300  | C | 5.88081000   | 7.09512900  | 1.18286600  |
| C | -3.99105400  | 4.23028000  | -1.34328800 | H | 5.38744400   | 5.65936000  | 2.54512200  |
| H | -2.01779900  | 5.02295800  | -1.64035600 | C | -4.60439700  | 1.21204100  | 1.51552900  |
| C | 0.83298300   | 6.25203000  | 1.18529900  | H | -5.47925500  | 2.55878000  | 2.94228000  |
| N | -9.41868900  | 5.61619300  | -5.37847600 | H | -3.48815100  | 0.05142600  | 0.09536400  |
| H | -8.23634600  | 4.92348700  | -3.81815200 | C | 2.87929800   | 1.94481300  | 0.98229800  |
| H | -7.46581600  | 4.85981300  | -5.42396600 | C | 3.03585700   | 2.84594600  | 3.20554500  |
| C | 4.48291700   | 10.98520600 | 0.28965300  | C | 9.80465700   | 13.01527400 | 1.89737600  |
| H | 4.18556900   | 9.13620100  | -0.47883000 | C | -10.83195000 | 2.07723600  | -1.49264000 |
| C | -5.27686600  | 4.47371500  | -0.85502400 | H | -9.86234500  | 3.74690400  | -2.15764600 |
| H | -6.56539200  | 5.89561100  | 0.11465000  | O | 5.60510900   | 7.76615700  | 0.19384100  |
| H | -3.75900400  | 3.26228000  | -1.77943500 | C | 7.23722000   | 7.22510100  | 1.88048000  |
| C | 1.71943100   | 6.44270900  | 0.11890000  | N | -5.72855000  | 0.33724300  | 1.47909300  |
| C | 1.37233300   | 6.03631200  | 2.45805100  | C | 4.26654800   | 1.90361500  | 0.89771000  |
| H | -2.57871100  | 5.45641800  | 1.34620300  | H | 2.27656800   | 1.58080700  | 0.15489200  |
| C | -10.53500500 | 5.52356000  | -4.60675700 | C | 4.42039400   | 2.82632300  | 3.13074500  |
| H | -9.45485300  | 6.27952900  | -6.14540000 | H | 2.54826600   | 3.19241000  | 4.11372700  |
| O | 4.06288300   | 12.06307600 | 0.69763900  | O | -10.85539300 | 1.06875100  | -0.78882800 |
| C | 5.96192400   | 10.63533600 | 0.43382200  | O | -11.92056200 | 2.57306900  | -2.11337400 |
| N | -6.26746900  | 3.45779100  | -0.91232000 | N | 8.21150100   | 7.89919800  | 1.06870600  |
| C | 3.09538400   | 6.42714600  | 0.29521500  | H | 7.60386600   | 6.24179100  | 2.18455800  |
| H | 1.31419000   | 6.56938800  | -0.88049100 | H | 7.07397300   | 7.81175300  | 2.79252600  |
| C | 2.74847100   | 6.04937900  | 2.65384000  | C | -6.38457900  | 0.03225000  | 0.33077100  |
| H | 0.70707100   | 5.86284400  | 3.29990400  | H | -6.15347800  | 0.01108000  | 2.34786600  |
| C | -2.36879100  | 2.92040400  | 1.57755800  | C | 5.03766700   | 2.36947300  | 1.96213900  |
| O | -10.59913300 | 4.92200500  | -3.54587700 | H | 4.75296500   | 1.50282400  | 0.01084900  |
| O | -11.57541000 | 6.13213100  | -5.18982900 | H | 5.02706000   | 3.15947500  | 3.96338500  |
| N | 6.67617300   | 11.83666500 | 0.77569500  | C | -13.17869700 | 2.07848400  | -1.65595900 |
| H | 6.34970700   | 10.17087200 | -0.47944700 | C | 8.82848800   | 7.22089700  | 0.07612900  |
| H | 6.06523000   | 9.88487800  | 1.22673700  | H | 8.18278500   | 8.91643900  | 0.99588900  |
| C | -7.56078300  | 3.70889900  | -1.22253900 | O | -6.08765000  | 0.50891200  | -0.76588000 |
| H | -5.97808400  | 2.48198600  | -0.80035100 | C | -7.56538700  | -0.92024800 | 0.50973700  |
| C | 3.61936900   | 6.24151700  | 1.57477100  | N | 6.44588100   | 2.35729800  | 1.83882800  |

|   |              |             |             |   |             |             |             |
|---|--------------|-------------|-------------|---|-------------|-------------|-------------|
| O | 8.79093500   | 6.00941700  | -0.07458500 | H | -2.36261100 | 0.79794700  | 3.25503800  |
| O | 9.52533700   | 8.05183300  | -0.71637400 | C | -1.51882400 | -2.32789300 | 5.37404300  |
| N | -8.74552000  | -0.20486500 | 0.95176900  | H | 0.49356900  | -1.59831300 | 5.38239100  |
| H | -7.31421900  | -1.67565300 | 1.26267400  | C | 0.18670800  | -3.08220100 | 1.45242800  |
| H | -7.77601000  | -1.40368500 | -0.44453000 | H | -0.52112700 | -1.33697500 | 2.30110700  |
| C | 7.26392100   | 3.33649500  | 2.29608200  | C | 4.06847500  | -1.73998200 | 2.42496800  |
| H | 6.86399100   | 1.65439700  | 1.22955700  | C | 2.97565500  | -1.42030700 | 0.30764000  |
| C | 10.27785200  | 7.41466600  | -1.74617100 | C | -2.81492900 | -2.13501400 | 4.88325700  |
| C | -8.91286100  | 0.05286500  | 2.26799900  | H | -4.11638400 | -0.83294300 | 3.77091100  |
| H | -9.43234200  | 0.14873200  | 0.28387200  | H | -1.29135100 | -3.21257000 | 5.95318600  |
| O | 6.90152400   | 4.28005800  | 2.99332200  | C | 1.33447300  | -3.88912300 | 1.02875500  |
| C | 8.72416200   | 3.18810700  | 1.86621300  | C | -1.22284800 | -3.55907100 | 1.41026600  |
| O | -8.12572000  | -0.26910900 | 3.14855100  | C | 5.26355200  | -2.00603200 | 1.75881800  |
| O | -10.06222400 | 0.71429000  | 2.48784900  | H | 4.03195200  | -1.77605200 | 3.51039800  |
| N | 8.90674600   | 3.24948100  | 0.43155800  | C | 4.15897200  | -1.67736300 | -0.36398600 |
| H | 9.12640100   | 2.23597200  | 2.22807600  | H | 2.06967100  | -1.21438700 | -0.25709500 |
| H | 9.28182200   | 4.00885900  | 2.31881700  | N | -3.86233500 | -3.05770200 | 5.04440800  |
| C | -10.40341600 | 0.88786200  | 3.85979300  | C | 1.44089800  | -4.75611600 | -0.00753400 |
| C | 8.76263800   | 2.15993700  | -0.34362500 | H | 2.25107400  | -3.64809800 | 1.54699200  |
| H | 8.97340500   | 4.17195000  | 0.00234500  | C | -2.26866300 | -2.64719900 | 1.21748700  |
| O | 8.39078100   | 1.05986400  | 0.06332900  | C | -1.55474500 | -4.89607900 | 1.66269200  |
| O | 9.10439600   | 2.41912400  | -1.61250400 | C | 5.31301900  | -1.97876100 | 0.36603000  |
| C | 8.98469200   | 1.32422400  | -2.52935900 | H | 6.16577000  | -2.23732400 | 2.31833400  |
| H | 10.05345500  | 14.06849200 | 2.02063900  | H | 4.20253700  | -1.65640500 | -1.44572200 |
| H | 10.45578100  | 12.55079800 | 1.15287900  | C | -3.99534400 | -3.96914300 | 6.04901200  |
| H | 9.90647100   | 12.48418200 | 2.84619400  | H | -4.63978500 | -2.95505500 | 4.38830000  |
| H | 10.77523800  | 8.22122900  | -2.28170000 | C | 0.23240700  | -5.09896000 | -0.77456800 |
| H | 9.61443100   | 6.85667400  | -2.41052800 | C | 2.79865400  | -5.24022900 | -0.38097100 |
| H | 11.01715400  | 6.73625900  | -1.31295100 | C | -3.59369200 | -3.03291500 | 1.32373000  |
| H | 9.11515200   | 1.76155300  | -3.51809700 | H | -2.04083000 | -1.61150700 | 0.98470800  |
| H | 8.00578800   | 0.84787200  | -2.43619300 | C | -2.88198900 | -5.29817900 | 1.75469600  |
| H | 9.77895300   | 0.59669000  | -2.33316200 | H | -0.76078200 | -5.62384100 | 1.80351700  |
| H | -12.91525200 | 6.86659000  | -3.79813400 | N | 6.53117100  | -2.28106300 | -0.28669700 |
| H | -13.59638400 | 6.09669300  | -5.26805200 | O | -3.14406800 | -4.24139000 | 6.87626500  |
| H | -12.88821300 | 5.08709900  | -3.96335600 | C | -5.40974600 | -4.54761900 | 6.14629500  |
| H | -13.91683300 | 2.81246300  | -1.97574500 | C | -0.14160700 | -6.31466300 | -1.23247300 |
| H | -13.18163300 | 1.97869200  | -0.56951700 | H | -0.50967500 | -4.30937200 | -0.83559600 |
| H | -13.41022200 | 1.11417300  | -2.11647100 | C | 3.83536600  | -5.31647200 | 0.56081800  |
| H | -11.25019300 | 1.57321000  | 3.86933700  | C | 3.10946300  | -5.54402400 | -1.71367000 |
| H | -9.56300000  | 1.30474000  | 4.41851700  | C | -3.90429400 | -4.36325200 | 1.60286500  |
| H | -10.69206100 | -0.07450100 | 4.29522500  | H | -4.38886000 | -2.30608000 | 1.18828600  |
| H | -3.79591000  | 13.52346200 | -0.76500600 | H | -3.13156800 | -6.33522800 | 1.95987800  |
| C | 0.03098800   | 1.82111300  | 3.28183500  | C | 7.00791000  | -1.59240700 | -1.35643600 |
| C | 0.28582800   | 0.55108500  | 3.68049900  | H | 7.06468300  | -3.08738000 | 0.03689900  |
| H | -0.90198400  | 2.27349600  | 3.60788600  | N | -6.24728700 | -3.55572400 | 6.79782800  |
| C | 1.53934600   | -0.11410600 | 3.23101500  | H | -5.83501900 | -4.73887800 | 5.15760100  |
| C | -0.79502000  | -0.26209400 | 4.29960100  | H | -5.36829600 | -5.47787500 | 6.71778800  |
| C | 1.60388200   | -1.14739900 | 2.35814300  | C | 0.79672800  | -7.44588300 | -1.17855000 |
| H | 2.47404800   | 0.37434000  | 3.48669500  | C | -1.54310600 | -6.46752700 | -1.69585700 |
| C | -2.11942200  | -0.05319300 | 3.88121200  | C | 5.13314800  | -5.64073100 | 0.19224300  |
| C | -0.52760800  | -1.40072000 | 5.06718800  | H | 3.62771600  | -5.12859300 | 1.60980900  |
| C | 0.37681700   | -1.84927200 | 1.98895100  | C | 4.40057800  | -5.88951000 | -2.09148600 |
| C | 2.90796400   | -1.45055700 | 1.70799300  | H | 2.32697100  | -5.49604100 | -2.46538900 |
| C | -3.10977700  | -0.97627800 | 4.15857900  | N | -5.26059100 | -4.77564100 | 1.67584300  |

|   |             |              |             |   |              |              |             |
|---|-------------|--------------|-------------|---|--------------|--------------|-------------|
| O | 6.40908300  | -0.69578400  | -1.93030700 | C | 12.29549100  | -2.29075300  | 1.04719900  |
| C | 8.43024000  | -1.98688700  | -1.76112800 | C | 4.92409900   | -10.01533400 | -2.32828000 |
| C | -7.40150800 | -3.09809600  | 6.27753000  | H | 4.59775600   | -10.59024400 | -0.28503800 |
| H | -5.86667000 | -3.04272200  | 7.58280400  | H | 4.96227500   | -9.38877700  | -4.38117400 |
| C | 1.04844900  | -8.26431300  | -2.21035500 | C | -6.63444100  | -6.43714100  | -1.27662800 |
| H | 1.48199400  | -7.46263800  | -0.33415500 | H | -6.03069400  | -5.92645100  | -3.11816800 |
| C | -2.15121400 | -5.49880500  | -2.50176400 | N | 10.30305900  | -6.02106100  | -0.97164300 |
| C | -2.34286500 | -7.47876700  | -1.14855100 | H | 9.06323200   | -7.37967900  | -1.94395400 |
| C | 5.42289000  | -5.92572400  | -1.14321900 | H | 9.25197200   | -5.82638400  | -2.75536000 |
| H | 5.92116600  | -5.69126000  | 0.93496500  | O | -9.78037300  | -3.43016400  | 0.63349300  |
| H | 4.62502900  | -6.12356800  | -3.12857900 | O | -10.37482500 | -2.30732800  | 2.50697500  |
| C | -6.22249700 | -4.06356700  | 2.29506300  | H | 12.61393900  | -1.75849800  | 1.94231600  |
| H | -5.53820800 | -5.59899100  | 1.13498200  | H | 12.11504500  | -3.34447400  | 1.27516500  |
| N | 9.34495200  | -1.55620200  | -0.72235000 | H | 13.05644600  | -2.20079900  | 0.26813000  |
| H | 8.52599500  | -3.07056200  | -1.86928100 | N | 6.26668000   | -10.47094300 | -2.32232400 |
| H | 8.64259100  | -1.51202500  | -2.72294600 | O | -6.39364700  | -6.73239700  | -0.10923100 |
| O | -8.00781800 | -3.61250500  | 5.34002000  | C | -8.03367900  | -5.99975400  | -1.71452500 |
| O | -7.81858600 | -2.00379700  | 6.92094800  | C | 10.86249000  | -6.95079700  | -0.18380700 |
| C | 2.30108700  | -9.03655500  | -2.26944600 | H | 10.51405000  | -5.03961400  | -0.79214100 |
| H | 0.44424700  | -8.20059400  | -3.11536500 | C | -11.52683000 | -1.84375100  | 1.79549200  |
| C | -3.52395100 | -5.50037200  | -2.70078200 | C | 7.31922500   | -9.71349200  | -2.71492200 |
| H | -1.54038100 | -4.72319400  | -2.95471400 | H | 6.49313300   | -11.32100900 | -1.80458100 |
| C | -3.72189600 | -7.47956800  | -1.32543000 | N | -8.13785500  | -4.55260600  | -1.64935800 |
| H | -1.87820300 | -8.24703800  | -0.53618900 | H | -8.25867000  | -6.34131800  | -2.73000900 |
| N | 6.72555100  | -6.30305300  | -1.55490400 | H | -8.75149900  | -6.43287100  | -1.01979600 |
| O | -6.02493200 | -3.06674300  | 2.99347100  | O | 10.60207100  | -8.15174500  | -0.18708500 |
| C | -7.63735300 | -4.58491900  | 2.05917500  | O | 11.79319100  | -6.41636300  | 0.63048600  |
| C | 10.47050700 | -2.21589200  | -0.42022600 | H | -12.02055700 | -1.14147900  | 2.46644500  |
| H | 9.13826600  | -0.68786600  | -0.22718200 | H | -11.22365500 | -1.34229800  | 0.87167700  |
| C | -9.04699400 | -1.44904800  | 6.45209100  | H | -12.18923100 | -2.68500800  | 1.57036300  |
| C | 2.85867400  | -9.64838400  | -1.14143100 | O | 7.22306100   | -8.60008900  | -3.22723700 |
| C | 3.05919000  | -8.99008800  | -3.44681900 | C | 8.68216400   | -10.34516400 | -2.43473700 |
| C | -4.31448400 | -6.47163800  | -2.08581900 | C | -7.55619900  | -3.79484700  | -2.60891300 |
| H | -4.00058700 | -4.73266200  | -3.30543200 | H | -8.67826300  | -4.10522800  | -0.90884000 |
| H | -4.34333900 | -8.24030600  | -0.86643600 | C | 12.48918900  | -7.36418100  | 1.44444700  |
| C | 7.87587900  | -5.75311700  | -1.10755000 | N | 8.98873600   | -10.36787700 | -1.01828500 |
| H | 6.79048400  | -7.03577300  | -2.26557800 | H | 8.71469000   | -11.36991900 | -2.81733800 |
| N | -8.60905800 | -3.66176200  | 2.58493100  | H | 9.43416200   | -9.74776500  | -2.95270400 |
| H | -7.79963500 | -4.72147700  | 0.98724400  | O | -6.95840500  | -4.22900000  | -3.58149400 |
| H | -7.74285300 | -5.58130900  | 2.50978400  | O | -7.70518500  | -2.48427300  | -2.35158800 |
| O | 10.91331100 | -3.19933000  | -1.01922900 | H | 13.11964900  | -6.77159100  | 2.10400300  |
| O | 11.08515000 | -1.65913800  | 0.63571200  | H | 11.78029800  | -7.96477300  | 2.01605100  |
| H | -9.15541000 | -0.50034300  | 6.97633500  | H | 13.10741400  | -8.01513800  | 0.82043200  |
| H | -9.87741600 | -2.11073700  | 6.70664700  | C | 8.50258600   | -11.35594900 | -0.23398300 |
| H | -9.00072200 | -1.28412900  | 5.37176800  | H | 9.47118400   | -9.57796500  | -0.59224400 |
| C | 4.15820500  | -10.13622700 | -1.16908600 | C | -7.16409000  | -1.58143800  | -3.32192400 |
| H | 2.27372600  | -9.72053900  | -0.22901300 | O | 7.76147800   | -12.25120000 | -0.61882800 |
| C | 4.36472900  | -9.46099400  | -3.47922400 | O | 8.93556700   | -11.24223500 | 1.03084900  |
| H | 2.63347100  | -8.53109800  | -4.33570000 | H | -7.19307700  | -0.60099800  | -2.84738900 |
| N | -5.71667700 | -6.40464900  | -2.27513400 | H | -6.13713900  | -1.86014000  | -3.56237000 |
| O | 7.95626900  | -4.85516100  | -0.27184100 | H | -7.77484400  | -1.59465600  | -4.22725400 |
| C | 9.14222000  | -6.30350300  | -1.77274800 | C | 8.45213100   | -12.25211400 | 1.91507600  |
| C | -9.58680900 | -3.15445100  | 1.81406300  | H | 8.87834700   | -12.01580800 | 2.88890800  |
| H | -8.38808200 | -3.21440500  | 3.47409900  | H | 7.36089300   | -12.23351500 | 1.95892500  |



|    |              |              |             |
|----|--------------|--------------|-------------|
| H  | 8.77808800   | -13.23943400 | 1.58216300  |
| H  | -9.46816300  | 3.08214300   | -4.53075100 |
| C  | -8.94193800  | 2.20692500   | -4.91391100 |
| Cl | -7.36874100  | 2.09869600   | -4.08701700 |
| Cl | -8.70055700  | 2.38707700   | -6.65455800 |
| Cl | -9.93575600  | 0.78298300   | -4.54238200 |
| H  | -12.59810500 | 1.68569200   | -4.46987300 |
| C  | -13.11906100 | 2.00014300   | -5.37251800 |
| Cl | -12.11182100 | 3.21072800   | -6.17750100 |
| Cl | -14.68133600 | 2.69335300   | -4.88559700 |
| Cl | -13.35571600 | 0.58842700   | -6.41152400 |
| H  | -12.15658800 | -0.55055000  | -1.38563000 |
| C  | -12.12272400 | -1.44430100  | -2.00513700 |
| Cl | -13.11659800 | -2.70731800  | -1.25274100 |
| Cl | -10.43022400 | -1.92314300  | -2.11581100 |
| Cl | -12.76563400 | -1.03133100  | -3.61185100 |
| H  | -8.04045700  | -5.63930200  | 4.94682900  |
| C  | -8.03253300  | -6.71719100  | 5.10097000  |
| Cl | -6.55564600  | -7.37963400  | 4.35802000  |
| Cl | -9.47212800  | -7.40129800  | 4.33595000  |
| Cl | -8.02881200  | -6.98596100  | 6.85069400  |
| H  | -10.26866100 | -3.52520900  | 4.61240800  |
| C  | -11.24957800 | -3.86249000  | 4.93749300  |
| Cl | -12.25497800 | -2.41980500  | 5.23239600  |
| Cl | -11.02404200 | -4.79192300  | 6.42511400  |
| Cl | -11.96253700 | -4.84737700  | 3.65559300  |
| H  | -11.34202300 | -4.57417700  | -0.03824500 |
| C  | -11.68476900 | -5.60520100  | -0.09846000 |
| Cl | -13.34563200 | -5.68151100  | 0.52007300  |
| Cl | -10.59558600 | -6.57886400  | 0.91137000  |
| Cl | -11.61232600 | -6.11753700  | -1.79259900 |
| H  | 4.62966000   | 11.55478700  | 2.83665700  |
| C  | 4.72918000   | 10.82950600  | 3.64368900  |
| Cl | 3.98817100   | 9.30832100   | 3.09722300  |
| Cl | 3.89219100   | 11.46350600  | 5.06700300  |
| Cl | 6.46162400   | 10.60363300  | 3.97143200  |
| H  | 10.29310400  | 9.40025600   | 1.34776600  |
| C  | 11.37542200  | 9.33199000   | 1.37870200  |
| Cl | 11.93117400  | 10.17210600  | 2.83993900  |
| Cl | 12.00009800  | 10.12723900  | -0.07836600 |
| Cl | 11.84472000  | 7.62273300   | 1.42581800  |
| H  | 11.17855800  | 3.26675200   | -0.93629200 |
| C  | 12.03459500  | 2.93013900   | -0.35720000 |
| Cl | 12.15366400  | 3.94264300   | 1.09248500  |
| Cl | 13.48301100  | 3.09249200   | -1.36312600 |
| Cl | 11.74246600  | 1.23225700   | 0.07618800  |
| H  | 11.80086100  | -2.87010200  | -2.99588300 |
| C  | 11.77107100  | -3.34290000  | -3.97468000 |
| Cl | 11.96737400  | -5.08218100  | -3.70849100 |
| Cl | 13.07130300  | -2.68981600  | -4.98127100 |
| Cl | 10.18532500  | -2.99464800  | -4.69726900 |
| H  | 12.89495300  | -4.64203800  | -0.63130800 |
| C  | 13.97198700  | -4.76826600  | -0.73520300 |
| Cl | 14.56363100  | -3.48871100  | -1.81056300 |

|    |             |              |             |
|----|-------------|--------------|-------------|
| Cl | 14.29439600 | -6.37316900  | -1.39931500 |
| Cl | 14.71151600 | -4.61541100  | 0.87849600  |
| H  | 11.78964600 | -9.70002400  | -1.04677300 |
| C  | 12.37474900 | -9.88579500  | -1.94443300 |
| Cl | 14.09260700 | -9.82076000  | -1.50826100 |
| Cl | 11.96593700 | -8.60175200  | -3.10172700 |
| Cl | 11.95153800 | -11.48176800 | -2.58828700 |

### 1b-8-mer<sub>RH</sub>-1b-8-mer<sub>LH</sub>/16THF

|   |              |             |             |
|---|--------------|-------------|-------------|
| C | -13.89186400 | 3.74775100  | -0.40292800 |
| C | -12.56290000 | 3.61084500  | -0.52539100 |
| C | -11.65133000 | 4.49581600  | 0.22935900  |
| C | -10.35256800 | 4.28514900  | 0.56380300  |
| C | -9.64909600  | 3.02952500  | 0.26098200  |
| C | -8.32691000  | 2.80777400  | 0.04904600  |
| C | -7.26722200  | 3.82828200  | 0.15910200  |
| C | -6.01823900  | 3.62664000  | 0.64794100  |
| C | -5.56219500  | 2.29628000  | 1.09021000  |
| C | -4.31988900  | 1.76622800  | 0.96506900  |
| C | -3.20257100  | 2.55982300  | 0.42327900  |
| C | -1.92384300  | 2.59610300  | 0.86645500  |
| H | -14.57550500 | 3.12444100  | -0.97098000 |
| C | -11.97970300 | 2.57294100  | -1.42551300 |
| C | -12.20136700 | 1.21238100  | -1.19964500 |
| C | -11.06323100 | 2.93712200  | -2.41574100 |
| H | -12.09990800 | 5.42899400  | 0.56875400  |
| C | -11.45864800 | 0.25057200  | -1.87775700 |
| H | -12.90786600 | 0.90885900  | -0.43161900 |
| C | -10.32864200 | 1.98932200  | -3.11371400 |
| H | -10.87406100 | 3.99190400  | -2.59644000 |
| C | -9.54863100  | 5.36048600  | 1.20840700  |
| C | -10.49081200 | 0.63240400  | -2.81023700 |
| H | -11.59954400 | -0.80520600 | -1.66014400 |
| H | -9.60063400  | 2.28970200  | -3.85501600 |
| C | -9.35035500  | 6.58436200  | 0.56231800  |
| C | -8.78690200  | 5.09017000  | 2.34989700  |
| H | -10.28437100 | 2.16353500  | 0.12443200  |
| N | -9.66351300  | -0.36729800 | -3.36604400 |
| C | -8.34121700  | 7.44542000  | 0.97299300  |
| H | -9.93227300  | 6.81872100  | -0.32500800 |
| C | -7.78454200  | 5.94625200  | 2.78606200  |
| H | -8.92797600  | 4.14149500  | 2.86124800  |
| C | -7.91979000  | 1.43394200  | -0.35623800 |
| C | -8.99968300  | -0.29302700 | -4.55848900 |
| H | -9.46179700  | -1.17741300 | -2.78257400 |
| C | -7.51317800  | 7.10649900  | 2.05010800  |
| H | -8.15211500  | 8.36700200  | 0.42732000  |
| H | -7.16972400  | 5.69620500  | 3.63955500  |
| C | -8.38548000  | 0.29614000  | 0.31027300  |
| C | -6.99242200  | 1.25865500  | -1.38860800 |
| H | -7.52991100  | 4.85001400  | -0.09793900 |
| O | -9.09482300  | 0.63201800  | -5.34873400 |
| C | -8.14225400  | -1.52132700 | -4.85689300 |
| N | -6.40910500  | 7.93949700  | 2.29135600  |

|   |              |             |             |   |             |             |             |
|---|--------------|-------------|-------------|---|-------------|-------------|-------------|
| C | -7.88362200  | -0.96116500 | 0.00312500  | H | -4.82421000 | -4.61460300 | -3.06640100 |
| H | -9.10616800  | 0.40688400  | 1.11619500  | C | -1.22468000 | 8.07238200  | 1.90756900  |
| C | -6.48312900  | 0.00916400  | -1.71210600 | H | -1.61817100 | 7.85616000  | -0.06743500 |
| H | -6.62113800  | 2.13385500  | -1.91474200 | C | -3.98363500 | -2.47107200 | 1.69379700  |
| C | -5.08289400  | 4.77741200  | 0.75737500  | H | -5.16314000 | -2.09618000 | 3.45509300  |
| N | -8.93934900  | -2.72220500 | -5.00577000 | H | -2.79917900 | -2.51421100 | -0.10469300 |
| H | -7.40412500  | -1.67069500 | -4.06238700 | C | -0.91988200 | 3.77232500  | -1.11811800 |
| H | -7.60996100  | -1.32661700 | -5.79046400 | C | -0.25808100 | 4.45883200  | 1.08133600  |
| C | -5.49828700  | 7.87698800  | 3.30754300  | C | -6.92089300 | 12.88702600 | 2.35521100  |
| H | -6.23620600  | 8.66215400  | 1.59680800  | C | -7.06195500 | -5.42113700 | -0.80064400 |
| C | -6.90328700  | -1.10956600 | -0.98321000 | H | -7.08550500 | -5.34607400 | -2.83676700 |
| H | -8.21820500  | -1.83726200 | 0.55354200  | O | -1.43409500 | 7.81361200  | 3.08359700  |
| H | -5.73515800  | -0.10353000 | -2.48523800 | C | -0.07800900 | 8.98699800  | 1.48038000  |
| C | -4.82716700  | 5.62412000  | -0.32639200 | N | -3.90537900 | -3.83876400 | 2.02110800  |
| C | -4.35406700  | 4.97640200  | 1.93303700  | C | -0.07063300 | 4.72085300  | -1.66611000 |
| H | -6.33917500  | 1.62629100  | 1.44067100  | H | -1.49365300 | 3.12058500  | -1.77084600 |
| C | -9.23666000  | -3.50305100 | -3.95157600 | C | 0.61031400  | 5.40666700  | 0.54857800  |
| H | -9.39050200  | -2.90712200 | -5.90476900 | H | -0.32838700 | 4.35318200  | 2.16150100  |
| O | -5.55842400  | 7.11430400  | 4.25897600  | O | -6.59830600 | -5.04733900 | 0.27434200  |
| C | -4.39699200  | 8.93599000  | 3.18221600  | O | -8.18242300 | -6.16586600 | -0.89306600 |
| N | -6.34029600  | -2.38376300 | -1.15421900 | N | -0.51748800 | 10.12678100 | 0.70509800  |
| C | -3.81942500  | 6.57692100  | -0.25947300 | H | 0.64991900  | 8.40916500  | 0.90000700  |
| H | -5.38079900  | 5.48802600  | -1.25180800 | H | 0.40786800  | 9.33876600  | 2.39351900  |
| C | -3.34993700  | 5.93161800  | 2.02158700  | C | -3.49288600 | -4.87947600 | 1.24372700  |
| H | -4.54897700  | 4.33708800  | 2.78993500  | H | -4.26961400 | -4.09482700 | 2.93677600  |
| C | -4.15372000  | 0.31622400  | 1.26516900  | C | 0.71769600  | 5.53408500  | -0.84318300 |
| O | -8.84679900  | -3.33115000 | -2.80422900 | H | 0.01307400  | 4.81991900  | -2.74585500 |
| O | -10.06719200 | -4.50816500 | -4.31652800 | H | 1.21735400  | 6.02520900  | 1.19633700  |
| N | -4.89980000  | 10.25174800 | 3.54568100  | C | -8.84857800 | -6.40243600 | 0.34585500  |
| H | -4.01088800  | 8.97669800  | 2.15796600  | C | -0.63850700 | 10.06852400 | -0.63498600 |
| H | -3.57937400  | 8.65662600  | 3.84794700  | H | -0.79557400 | 10.97475500 | 1.20038200  |
| C | -5.71464000  | -2.86091800 | -2.26024400 | O | -3.03357900 | -4.77165200 | 0.11548600  |
| H | -6.46727200  | -3.04221200 | -0.38956400 | C | -3.66763100 | -6.24825500 | 1.91483300  |
| C | -3.04779700  | 6.71324700  | 0.89990100  | N | 1.60171500  | 6.41177900  | -1.49147400 |
| H | -3.59400000  | 7.19758400  | -1.12326400 | O | -0.41480400 | 9.07886100  | -1.32184800 |
| H | -2.78464600  | 6.05257400  | 2.93544900  | O | -1.08723000 | 11.24054400 | -1.12827000 |
| C | -4.77537300  | -0.28245800 | 2.36785100  | N | -5.06016800 | -6.57697400 | 2.18015300  |
| C | -3.44327400  | -0.51572200 | 0.38857000  | H | -3.10447500 | -6.28428600 | 2.85376000  |
| H | -3.46696900  | 3.28287400  | -0.34196700 | H | -3.26790800 | -6.99845600 | 1.23101900  |
| C | -10.35536800 | -5.43946500 | -3.27930100 | C | 2.41954900  | 7.35109200  | -0.95299600 |
| C | -5.64121000  | 10.95443800 | 2.66347900  | H | 1.59125100  | 6.38258600  | -2.51012800 |
| H | -4.95716000  | 10.48783700 | 4.54098900  | C | -1.20217900 | 11.28222500 | -2.54690000 |
| O | -5.45658700  | -2.20783800 | -3.26252800 | C | -5.71398000 | -6.04322900 | 3.23778900  |
| C | -5.35297800  | -4.33758200 | -2.15202300 | H | -5.64501700 | -6.73860900 | 1.36869200  |
| N | -1.97042200  | 7.61892700  | 0.85882000  | O | 2.55975700  | 7.56450600  | 0.24619500  |
| C | -4.69032700  | -1.65089300 | 2.58210300  | C | 3.19030100  | 8.15112100  | -2.00822300 |
| H | -5.31559500  | 0.33801400  | 3.07805800  | O | -5.20097200 | -5.39653500 | 4.14130400  |
| C | -3.35987300  | -1.89239700 | 0.58104200  | O | -7.02584600 | -6.33715000 | 3.20249700  |
| H | -2.94464100  | -0.07095800 | -0.46864500 | N | 2.34203300  | 9.03723800  | -2.78445500 |
| C | -1.01854300  | 3.61205400  | 0.26668400  | H | 3.70070700  | 7.45988600  | -2.68824000 |
| O | -5.78453300  | 10.68681900 | 1.47999500  | H | 3.92826000  | 8.75627400  | -1.47862200 |
| O | -6.20913700  | 12.03393000 | 3.24942300  | C | -7.79037500 | -5.76346100 | 4.25983100  |
| N | -6.51969100  | -5.18612200 | -2.00389800 | C | 1.58348900  | 8.55229500  | -3.78679900 |
| H | -4.68164600  | -4.48248200 | -1.29901200 | H | 2.04709200  | 9.91269700  | -2.35216700 |

|   |              |             |             |   |             |             |             |
|---|--------------|-------------|-------------|---|-------------|-------------|-------------|
| O | 1.59950000   | 7.39982600  | -4.20297400 | C | 3.10530700  | -4.05044600 | 1.85779000  |
| O | 0.81120800   | 9.51412300  | -4.32796500 | C | 4.98324800  | 1.79493400  | -1.90994200 |
| C | -0.13056600  | 9.04768700  | -5.28767000 | H | 5.47346600  | 3.06089700  | -0.24671000 |
| H | -7.35750700  | 13.66594400 | 2.97851000  | H | 4.24514400  | 0.45800900  | -3.41976700 |
| H | -7.69958700  | 12.33006600 | 1.83148400  | C | 1.75873100  | -4.57924700 | 4.81676700  |
| H | -6.23843300  | 13.32268600 | 1.62130400  | H | -0.07774900 | -4.61636200 | 3.97323300  |
| H | -1.64845400  | 12.25054900 | -2.77486400 | C | 4.56817700  | -3.42387200 | -0.75998300 |
| H | -1.84424500  | 10.47290200 | -2.90429600 | C | 6.18177300  | -1.48162300 | -0.35935100 |
| H | -0.21952700  | 11.18384000 | -3.01408300 | C | 1.19216000  | -5.42918700 | 0.40863400  |
| H | -0.67602000  | 9.93204500  | -5.61768500 | H | 0.57212400  | -3.51206000 | -0.32618600 |
| H | -0.81331800  | 8.32673800  | -4.83114600 | C | 3.05271600  | -5.43356400 | 1.94948500  |
| H | 0.37777800   | 8.57603900  | -6.13106200 | H | 3.86831600  | -3.51669000 | 2.41752600  |
| H | -11.08445000 | -6.13165000 | -3.70086600 | N | 6.11657800  | 2.22932300  | -2.63240000 |
| H | -9.44905700  | -5.97097600 | -2.97677300 | O | 2.77361900  | -3.99729700 | 5.16398500  |
| H | -10.76911600 | -4.93019500 | -2.40565400 | C | 1.58430700  | -6.09310500 | 4.97999300  |
| H | -9.76442600  | -6.93276100 | 0.08589900  | C | 5.42425400  | -4.45902200 | -0.90714300 |
| H | -9.07723500  | -5.45669300 | 0.84270900  | H | 3.53158000  | -3.59142600 | -1.02865100 |
| H | -8.23051300  | -7.00857800 | 1.01282500  | C | 7.01122900  | -1.03665900 | 0.67035400  |
| H | -8.82125000  | -6.06047000 | 4.07220700  | C | 6.60242800  | -1.29844300 | -1.68180700 |
| H | -7.69803600  | -4.67597000 | 4.25114500  | C | 2.12178900  | -6.13845300 | 1.17768600  |
| H | -7.45413000  | -6.14188900 | 5.22646600  | H | 0.44169700  | -5.97293300 | -0.16037500 |
| H | -14.32491800 | 4.48721900  | 0.26498200  | H | 3.75235200  | -5.96972000 | 2.57726300  |
| C | -1.45046200  | 1.70930300  | 1.94085100  | C | 6.10698000  | 2.59306000  | -3.94837000 |
| C | -0.24813100  | 1.08449200  | 2.01423200  | H | 6.92250100  | 2.53221100  | -2.09063100 |
| H | -2.20379900  | 1.41285300  | 2.66763100  | N | 0.46964300  | -6.43155000 | 5.85157100  |
| C | 0.86369100   | 1.36684400  | 1.08257800  | H | 1.42338800  | -6.55787500 | 4.00314900  |
| C | -0.07075900  | -0.06906800 | 2.94213600  | H | 2.50820700  | -6.49666200 | 5.39477400  |
| C | 1.67493000   | 0.46042200  | 0.48530300  | C | 6.83241200  | -4.30658600 | -0.47537700 |
| H | 1.03621700   | 2.40584500  | 0.82487900  | C | 4.91490400  | -5.75756600 | -1.40640600 |
| C | -1.09681100  | -1.01742400 | 3.05016000  | C | 8.23982500  | -0.44592800 | 0.38618700  |
| C | 1.16900400   | -0.38758700 | 3.50545500  | H | 6.70470100  | -1.18300200 | 1.70301100  |
| C | 1.51414400   | -0.99525700 | 0.66166100  | C | 7.81189800  | -0.69307500 | -1.97843000 |
| C | 2.78150000   | 0.96965700  | -0.37473200 | H | 5.96842200  | -1.65734200 | -2.48810400 |
| C | -0.84767300  | -2.27948300 | 3.56023200  | N | 2.12232800  | -7.54490000 | 1.09325400  |
| H | -2.07316800  | -0.79809900 | 2.63369600  | O | 5.22233000  | 2.31454200  | -4.74219500 |
| C | 1.43588700   | -1.64582100 | 4.03470000  | C | 7.25464200  | 3.53583200  | -4.30813400 |
| H | 1.97976200   | 0.33365500  | 3.43952300  | C | -0.79176900 | -6.47961400 | 5.37510900  |
| C | 2.52071500   | -1.89407000 | 0.75665100  | H | 0.57501000  | -6.28432800 | 6.85984100  |
| H | 0.50209100   | -1.35452400 | 0.83613800  | C | 7.88746000  | -4.45993600 | -1.28518000 |
| C | 3.67280100   | 1.93148300  | 0.11252300  | H | 6.98921100  | -3.85595000 | 0.50263800  |
| C | 3.00475600   | 0.44837700  | -1.65352900 | C | 3.84168100  | -5.82534300 | -2.30607200 |
| C | 0.43832700   | -2.62702400 | 3.99083300  | C | 5.41358500  | -6.96305900 | -0.89864300 |
| H | -1.63414800  | -3.03259900 | 3.55878400  | C | 8.64527100  | -0.27488900 | -0.93582900 |
| H | 2.42257300   | -1.89946100 | 4.39903900  | H | 8.89800700  | -0.12528200 | 1.18950800  |
| C | 3.93288000   | -1.48134000 | 0.61125500  | H | 8.12632500  | -0.54997400 | -3.00479500 |
| C | 2.25033600   | -3.33251800 | 1.01429000  | C | 2.66697900  | -8.41917900 | 1.98678500  |
| C | 4.77028800   | 2.33007900  | -0.63899900 | H | 1.69734100  | -7.95723000 | 0.26453400  |
| H | 3.52461000   | 2.33591100  | 1.11030200  | N | 6.96979400  | 4.85073800  | -3.74367700 |
| C | 4.08221500   | 0.86073400  | -2.42778400 | H | 8.20453000  | 3.16781000  | -3.91123000 |
| H | 2.33264800   | -0.31637000 | -2.03421900 | H | 7.31299800  | 3.61357600  | -5.39537900 |
| N | 0.64704300   | -3.98016600 | 4.29961900  | O | -1.11897200 | -6.31569500 | 4.20377000  |
| C | 4.86729500   | -2.13492800 | -0.11520900 | O | -1.67628200 | -6.75003300 | 6.35407500  |
| H | 4.20950400   | -0.51383500 | 1.01831900  | C | 9.23796200  | -3.97681700 | -0.95674700 |
| C | 1.25694700   | -4.04318800 | 0.33010100  | H | 7.72919700  | -4.81783900 | -2.30286900 |

|   |             |              |             |   |             |              |             |
|---|-------------|--------------|-------------|---|-------------|--------------|-------------|
| C | 3.28468600  | -7.03991800  | -2.66374100 | C | 13.87115000 | -1.58387800  | -0.77846300 |
| H | 3.44692500  | -4.91169700  | -2.74015400 | H | 13.31713800 | -2.52148700  | 0.91826500  |
| C | 4.86434100  | -8.19416200  | -1.24582000 | N | 1.09397000  | -11.62984100 | -2.70347000 |
| H | 6.24855200  | -6.93428500  | -0.20436800 | H | 2.72186400  | -11.60849000 | -3.99074900 |
| N | 9.92783800  | 0.25573600   | -1.19634700 | H | 2.86143200  | -12.70777000 | -2.59591400 |
| O | 3.17421200  | -8.10390700  | 3.05406600  | O | 12.37635500 | 0.83318200   | 0.41034600  |
| C | 2.53998500  | -9.88179000  | 1.56133500  | O | 12.55097400 | 3.06033600   | 0.82052300  |
| C | 7.33664000  | 5.11285100   | -2.46257600 | H | -1.88451400 | -9.20877200  | -0.33372200 |
| H | 6.08810500  | 5.29544000   | -4.02230200 | H | -1.91082300 | -10.92908100 | -0.79251500 |
| C | -3.04598200 | -6.67358300  | 5.95489800  | H | -2.91640800 | -10.34090200 | 0.57845700  |
| C | 9.72047600  | -3.91210200  | 0.35642100  | O | 13.67418700 | -1.20958800  | -1.92745800 |
| C | 10.04686700 | -3.45993500  | -1.97507900 | C | 15.18400800 | -1.26357000  | -0.04990200 |
| C | 3.78967500  | -8.23776900  | -2.14027900 | C | 0.37524800  | -10.64570300 | -3.28318500 |
| H | 2.45677400  | -7.07717700  | -3.36805700 | H | 0.71429600  | -12.04908400 | -1.85333200 |
| H | 5.26407500  | -9.11368800  | -0.83948900 | C | 12.92564800 | 2.73447600   | 2.15366100  |
| C | 10.25220200 | 1.05402600   | -2.24680200 | N | 15.04294800 | -0.38622100  | 1.09206000  |
| H | 10.67309200 | 0.04071800   | -0.53579600 | H | 15.64596600 | -2.19738400  | 0.28728900  |
| N | 1.16787500  | -10.34094900 | 1.63749000  | H | 15.84272200 | -0.78467800  | -0.77588300 |
| H | 2.91983300  | -10.02494400 | 0.54424800  | O | 0.80145500  | -9.82261300  | -4.08344400 |
| H | 3.14679600  | -10.47279000 | 2.25057600  | O | -0.91449000 | -10.70289600 | -2.90316600 |
| O | 8.08085900  | 4.42967200   | -1.77493000 | H | 12.92857000 | 3.67965900   | 2.69697000  |
| O | 6.78316500  | 6.26898200   | -2.03603000 | H | 12.21132900 | 2.03711200   | 2.59692600  |
| H | -3.62388100 | -6.86420800  | 6.85874900  | H | 13.91770500 | 2.27686900   | 2.17455400  |
| H | -3.26884300 | -7.42865000  | 5.19593900  | C | 14.58070900 | -0.86098200  | 2.26554400  |
| H | -3.28106700 | -5.68887700  | 5.54927700  | H | 14.97698600 | 0.61215200   | 0.90210100  |
| C | 10.95457400 | -3.34673300  | 0.63313700  | C | -1.68228400 | -9.56223200  | -3.25146800 |
| H | 9.12561400  | -4.32139800  | 1.16819200  | O | 14.31971800 | -2.03359500  | 2.50436300  |
| C | 11.28337600 | -2.88062900  | -1.71555200 | O | 14.47181200 | 0.11639400   | 3.18568500  |
| H | 9.68635900  | -3.49170000  | -3.00040400 | H | -2.64373600 | -9.69519500  | -2.75438900 |
| N | 3.20459100  | -9.42376800  | -2.61418500 | H | -1.19014600 | -8.65312200  | -2.89483200 |
| O | 9.45907000  | 1.45582700   | -3.08883700 | H | -1.81165200 | -9.49964200  | -4.33191300 |
| C | 11.73465000 | 1.42768500   | -2.27327100 | C | 13.93498500 | -0.30586400  | 4.43546600  |
| C | 0.29458200  | -10.10799100 | 0.63827700  | H | 13.89774200 | 0.58916000   | 5.05573100  |
| H | 0.80330800  | -10.65463400 | 2.54022500  | H | 12.93392800 | -0.72192700  | 4.30177200  |
| C | 7.00554400  | 6.56431400   | -0.66004200 | H | 14.57636700 | -1.06187800  | 4.89282300  |
| C | 11.74986100 | -2.82870900  | -0.39741300 | O | -5.12250800 | 10.54235900  | 6.37097400  |
| H | 11.32455300 | -3.31167200  | 1.65525300  | C | -5.34217100 | 9.18492200   | 6.79169000  |
| H | 11.88981400 | -2.48057900  | -2.51661200 | C | -6.35518000 | 11.24303800  | 6.51866700  |
| C | 3.33616900  | -10.68624700 | -2.13104600 | C | -6.85932500 | 8.92539000   | 6.68796100  |
| H | 2.50065300  | -9.31397500  | -3.34391000 | H | -4.97484200 | 9.07003500   | 7.81787800  |
| N | 12.07068400 | 2.38578200   | -1.23882100 | H | -4.76608500 | 8.53244000   | 6.13114000  |
| H | 12.34516800 | 0.52562200   | -2.14996300 | C | -7.40824200 | 10.22997500  | 6.08548300  |
| H | 11.94513800 | 1.87502000   | -3.24659800 | H | -6.30367100 | 12.13710900  | 5.89271700  |
| O | 0.56376700  | -9.58307600  | -0.43570000 | H | -6.49230300 | 11.53933700  | 7.56921600  |
| O | -0.94513400 | -10.50671700 | 0.99190300  | H | -7.06879200 | 8.05596800   | 6.06234500  |
| H | 6.47137000  | 7.49468300   | -0.46911300 | H | -7.28850000 | 8.75125400   | 7.67876600  |
| H | 6.61219300  | 5.76557500   | -0.02666700 | H | -7.43036600 | 10.17414300  | 4.99158300  |
| H | 8.07278200  | 6.68750000   | -0.45655000 | H | -8.41249900 | 10.47691900  | 6.43742000  |
| N | 13.01760200 | -2.33800900  | -0.03892400 | O | -1.22024300 | 12.13528700  | 2.59296200  |
| O | 4.02944400  | -11.00857100 | -1.17442800 | C | -1.37936000 | 11.34709000  | 3.77349000  |
| C | 2.52259600  | -11.72194600 | -2.91982200 | C | -2.51177000 | 12.67892000  | 2.33182700  |
| C | 12.34106500 | 1.99421300   | 0.02020800  | C | -2.29291600 | 12.17521800  | 4.69047600  |
| H | 12.01295800 | 3.38161500   | -1.45526300 | H | -0.38342900 | 11.16137500  | 4.18347200  |
| C | -1.97458900 | -10.22983600 | 0.04421100  | H | -1.83910400 | 10.38153000  | 3.51391400  |

|   |             |             |             |   |              |              |             |
|---|-------------|-------------|-------------|---|--------------|--------------|-------------|
| C | -3.03472200 | 13.11468500 | 3.70732000  | H | 16.22886200  | 1.55237700   | -1.88664700 |
| H | -3.15391200 | 11.90354700 | 1.88371900  | H | 13.90455800  | 4.55303400   | -0.94033600 |
| H | -2.38907200 | 13.49339600 | 1.61455500  | H | 15.47363000  | 5.20581600   | -1.44505700 |
| H | -2.97621800 | 11.54266800 | 5.26178800  | H | 13.98919800  | 3.26158100   | -2.88278700 |
| H | -1.69904800 | 12.75469100 | 5.40135400  | H | 15.73147500  | 3.48090200   | -3.08030300 |
| H | -4.12002800 | 13.02039500 | 3.77828200  | O | -10.21607800 | -2.80403400  | -7.54716100 |
| H | -2.76774600 | 14.15718700 | 3.89807800  | C | -10.45601500 | -1.39751200  | -7.68647300 |
| O | 1.85358700  | 11.30861500 | -1.03445500 | C | -11.49450600 | -3.40364400  | -7.34656000 |
| C | 2.52200000  | 11.00507800 | 0.19098700  | C | -11.68742100 | -1.07299100  | -6.81077800 |
| C | 1.66857500  | 12.71600800 | -1.05729900 | H | -10.64696000 | -1.17780900  | -8.74581000 |
| C | 2.02740400  | 12.04369000 | 1.22066500  | H | -9.55370300  | -0.86536100  | -7.37069100 |
| H | 3.60727900  | 11.10033900 | 0.03808400  | C | -12.20809800 | -2.45999900  | -6.37974000 |
| H | 2.29905900  | 9.96502300  | 0.44199200  | H | -11.33469900 | -4.40974100  | -6.95010100 |
| C | 1.24903000  | 13.06821700 | 0.36876400  | H | -12.02123400 | -3.47236000  | -8.31082800 |
| H | 0.91405400  | 12.94375300 | -1.81330200 | H | -11.41565500 | -0.45259200  | -5.95440400 |
| H | 2.61328700  | 13.21155100 | -1.33041300 | H | -12.43725500 | -0.52780000  | -7.39096000 |
| H | 1.37738200  | 11.59843200 | 1.97790700  | H | -11.89657100 | -2.69008600  | -5.35462700 |
| H | 2.87260400  | 12.50628000 | 1.73664800  | H | -13.29825100 | -2.54559500  | -6.43421900 |
| H | 0.17250200  | 12.92043000 | 0.48373300  | O | -7.27837400  | -5.47158200  | -4.72333000 |
| H | 1.48447700  | 14.10283900 | 0.62911800  | C | -6.40912900  | -4.65185000  | -5.51252400 |
| O | 4.41484600  | 6.06261800  | -4.32350200 | C | -7.86802100  | -6.41313600  | -5.60899800 |
| C | 4.83392400  | 7.13669800  | -5.15618300 | C | -7.04344100  | -4.57842400  | -6.91768700 |
| C | 3.67854200  | 5.18590900  | -5.18387700 | H | -5.41847300  | -5.12744800  | -5.55762500 |
| C | 5.30699500  | 6.46447000  | -6.45450800 | H | -6.31059100  | -3.68865200  | -5.00522500 |
| H | 5.61532000  | 7.68394200  | -4.62137300 | C | -8.19888900  | -5.59759200  | -6.85640200 |
| H | 3.97855300  | 7.80267500  | -5.33731200 | H | -8.74040000  | -6.84399000  | -5.11189600 |
| C | 4.49403000  | 5.14468200  | -6.48626900 | H | -7.14767600  | -7.21644500  | -5.82916600 |
| H | 2.68090000  | 5.61300400  | -5.33707700 | H | -7.41868000  | -3.57892200  | -7.14979500 |
| H | 3.60436300  | 4.21631500  | -4.68857500 | H | -6.31113500  | -4.84660600  | -7.68336500 |
| H | 5.12656400  | 7.09671100  | -7.32650900 | H | -9.14995700  | -5.08079600  | -6.70876300 |
| H | 6.38172900  | 6.26141700  | -6.40773200 | H | -8.27313700  | -6.21328700  | -7.75562300 |
| H | 3.84564800  | 5.07657100  | -7.36201300 | O | -4.44820500  | -8.58659800  | -0.82022400 |
| H | 5.14515600  | 4.26710000  | -6.48354400 | C | -4.13210400  | -7.49019500  | -1.67054700 |
| O | 11.83252300 | 4.97727000  | -2.41732000 | C | -5.84876600  | -8.76041700  | -0.95384400 |
| C | 11.04066200 | 5.87432700  | -1.63916900 | C | -4.92424800  | -7.76118800  | -2.95698000 |
| C | 10.99714400 | 4.59737500  | -3.51333200 | H | -3.04653400  | -7.45756600  | -1.79690100 |
| C | 10.29840500 | 6.74946900  | -2.66434500 | H | -4.44735100  | -6.55438200  | -1.18848100 |
| H | 11.71968700 | 6.42759800  | -0.98609100 | C | -6.17335000  | -8.51276000  | -2.44109100 |
| H | 10.32781900 | 5.29999200  | -1.03243900 | H | -6.38011600  | -8.02247500  | -0.32693200 |
| C | 10.32571100 | 5.90055200  | -3.95861300 | H | -6.10163900  | -9.76130800  | -0.59549500 |
| H | 10.25711700 | 3.85895500  | -3.17361300 | H | -5.18789900  | -6.84804300  | -3.49583800 |
| H | 11.63831600 | 4.14604100  | -4.27522300 | H | -4.34243000  | -8.39798100  | -3.63039600 |
| H | 9.27840400  | 6.97194300  | -2.34216400 | H | -7.08315200  | -7.91552500  | -2.54665200 |
| H | 10.81477500 | 7.70060600  | -2.81416700 | H | -6.31930500  | -9.45449200  | -2.97596800 |
| H | 9.32770200  | 5.72569300  | -4.36766400 | O | 0.60124000   | -12.84436200 | -0.17519000 |
| H | 10.92786600 | 6.39444300  | -4.72540800 | C | -0.39083700  | -13.61039900 | 0.48938100  |
| O | 15.14100200 | 2.17652100  | -0.24362100 | C | 1.85627700   | -13.20959700 | 0.39979200  |
| C | 15.57224000 | 3.51582700  | -0.05190500 | C | 0.02944800   | -13.57474400 | 1.95732600  |
| C | 15.21892200 | 1.91637800  | -1.64648500 | H | -0.39609500  | -14.63851200 | 0.09483400  |
| C | 14.93165900 | 4.28869100  | -1.20204600 | H | -1.35912800  | -13.14446600 | 0.29340900  |
| H | 16.67144000 | 3.56403800  | -0.09905400 | C | 1.57014000   | -13.52729400 | 1.88245300  |
| H | 15.24308100 | 3.83737600  | 0.93904200  | H | 2.55174500   | -12.38304100 | 0.23192700  |
| C | 14.94470900 | 3.26223600  | -2.35341000 | H | 2.24128200   | -14.09981800 | -0.11948500 |
| H | 14.50148300 | 1.12324200  | -1.87448600 | H | -0.34997300  | -12.66011900 | 2.41584700  |

|   |             |              |            |
|---|-------------|--------------|------------|
| H | -0.34585600 | -14.43022200 | 2.52410200 |
| H | 1.96144200  | -12.75613200 | 2.54962100 |
| H | 2.02208000  | -14.48063200 | 2.16781000 |
| O | 0.31387700  | -11.12292300 | 4.25040500 |
| C | -1.11094500 | -11.00442900 | 4.37666900 |
| C | 0.96547900  | -10.24275800 | 5.18351800 |
| C | -1.34486300 | -9.76711700  | 5.23608800 |
| H | -1.49566400 | -11.91098500 | 4.86179500 |
| H | -1.53862500 | -10.92639000 | 3.37283600 |
| C | -0.12358300 | -9.80693900  | 6.15724300 |
| H | 1.38761800  | -9.38658900  | 4.63797000 |
| H | 1.78418900  | -10.79377200 | 5.65374400 |
| H | -1.32227300 | -8.86964800  | 4.60736400 |
| H | -2.29730000 | -9.79580800  | 5.77157600 |
| H | 0.09217600  | -8.85003800  | 6.63359800 |
| H | -0.26394800 | -10.56674500 | 6.93365000 |
| O | 0.68434800  | -5.29419900  | 8.48615600 |
| C | -0.59159500 | -4.68491400  | 8.65525600 |
| C | 1.63231700  | -4.23872000  | 8.27354800 |
| C | -0.60123800 | -3.54874400  | 7.63845500 |
| H | -0.68498000 | -4.29551900  | 9.68072000 |
| H | -1.34902000 | -5.45327000  | 8.48983100 |
| C | 0.84021700  | -3.02261700  | 7.74447500 |
| H | 2.37935800  | -4.59610000  | 7.56020300 |
| H | 2.13254100  | -4.01404200  | 9.22343400 |
| H | -0.79128300 | -3.94603200  | 6.63482900 |
| H | -1.35259800 | -2.78517700  | 7.85252300 |
| H | 1.23096300  | -2.66906000  | 6.78752400 |
| H | 0.89331100  | -2.19331300  | 8.45556100 |
